# Supplementary material for: Impact of COVID-19 on the mental health of public university hospital workers in Brazil: A cohort-based analysis of 32,691 workers
Source: PubMed Central journal article supplement (PMC9202958; doi:10.1371/journal.pone.0269318), 2022-06-16
Supplement: pone.0269318.s001.pdf [file pone.0269318.s001.pdf]

Supporting Information. Data Analysis. Part 1.

```
GET
  FILE='C:\Users\User\Documents\Pesquisa\Force II\BDForceII_AbsperInd_Horiz.sav'.
DATASET NAME DataSet2 WINDOW=FRONT.
DATASET ACTIVATE DataSet2.
DATASET CLOSE DataSet1.
EXAMINE VARIABLES=Age
  /PLOT HISTOGRAM NPLOT
  /PERCENTILES(5,10,25,50,75,90,95) HAVERAGE
  /STATISTICS DESCRIPTIVES
  /CINTERVAL 95
  /MISSING LISTWISE
  /NOTOTAL.
```

## General Features of the Sample

### Explore

#### Case Processing Summary

|             | Valid |         | Cases Missing |         | Total |         |
|-------------|-------|---------|---------------|---------|-------|---------|
|             | N     | Percent | N             | Percent | N     | Percent |
| Age (years) | 32691 | 100,0%  | 0             | 0,0%    | 32691 | 100,0%  |

### Descriptives

|             |                                  | Statistic   | Std. Error |  |
|-------------|----------------------------------|-------------|------------|--|
| Age (years) | Mean                             | 39,27       | ,042       |  |
|             | 95% Confidence Interval for Mean | Lower Bound | 39,19      |  |
|             |                                  | Upper Bound | 39,35      |  |
|             | 5% Trimmed Mean                  | 38,85       |            |  |
|             | Median                           | 38,00       |            |  |
|             | Variance                         | 56,617      |            |  |
|             | Std. Deviation                   | 7,524       |            |  |
|             | Minimum                          | 20          |            |  |
|             | Maximum                          | 80          |            |  |
|             | Range                            | 60          |            |  |
|             | Interquartile Range              | 9           |            |  |
|             | Skewness                         | ,914        | ,014       |  |
|             | Kurtosis                         | 1,017       | ,027       |  |

### Percentiles

|                                |             | Percentiles |       |       |       |       |       |       |
|--------------------------------|-------------|-------------|-------|-------|-------|-------|-------|-------|
|                                |             | 5           | 10    | 25    | 50    | 75    | 90    | 95    |
| Weighted Average(Definition 1) | Age (years) | 29,00       | 31,00 | 34,00 | 38,00 | 43,00 | 50,00 | 54,00 |
| Tukey's Hinges                 | Age (years) |             |       | 34,00 | 38,00 | 43,00 |       |       |

**Tests of Normality**

|             | Kolmogorov-Smirnov <sup>a</sup> |       |      |
|-------------|---------------------------------|-------|------|
|             | Statistic                       | df    | Sig. |
| Age (years) | ,107                            | 32691 | ,000 |

a. Lilliefors Significance Correction

**Age (years)**

Supporting Information. Data Analysis. Part 1.

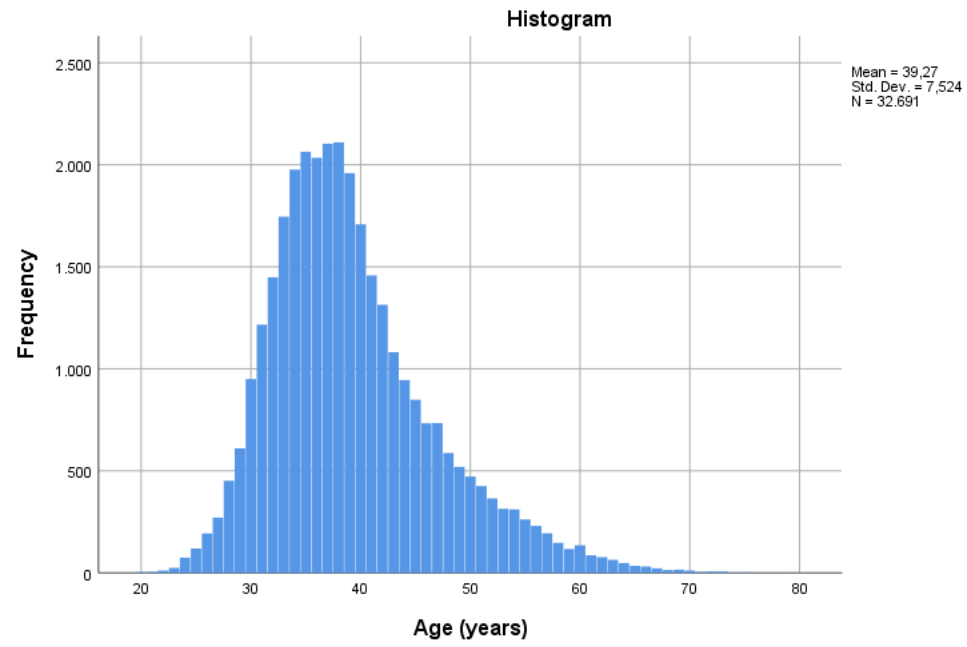

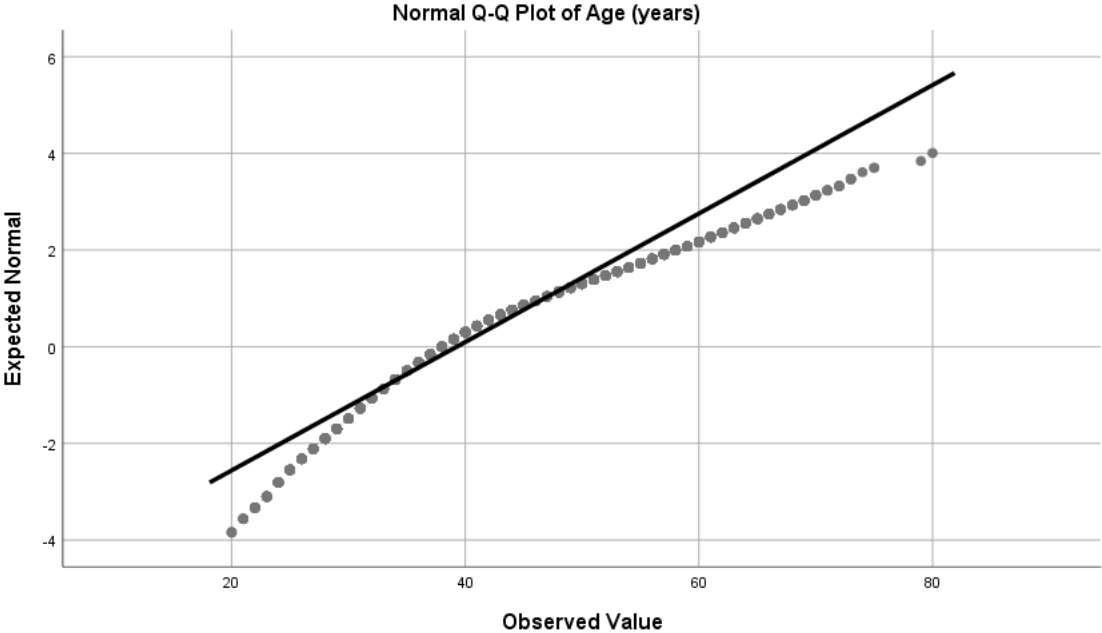

```
FREQUENCIES VARIABLES=Sex ProfCateg HCPcateg Profession Institution Region FedState City  
/FORMAT=DFREQ  
/ORDER=ANALYSIS.
```

**Frequencies**

|   |         | <b>Statistics</b> |                                    |                              |                         |                         |                |               |       |
|---|---------|-------------------|------------------------------------|------------------------------|-------------------------|-------------------------|----------------|---------------|-------|
|   |         | Gender            | Main type of professional activity | Healthcare provider category | Professional categories | Institution (workplace) | Country Region | Federal State | City  |
| N | Valid   | 32691             | 31434                              | 26956                        | 32691                   | 32691                   | 32691          | 32691         | 32691 |
|   | Missing | 0                 | 1257                               | 5735                         | 0                       | 0                       | 0              | 0             | 0     |

## Frequency Table

|       |        | <b>Gender</b> |         |               |                    |
|-------|--------|---------------|---------|---------------|--------------------|
|       |        | Frequency     | Percent | Valid Percent | Cumulative Percent |
| Valid | Female | 22982         | 70,3    | 70,3          | 70,3               |
|       | Male   | 9709          | 29,7    | 29,7          | 100,0              |
|       | Total  | 32691         | 100,0   | 100,0         |                    |

|  |  | <b>Main type of professional activity</b> |         |               |                    |
|--|--|-------------------------------------------|---------|---------------|--------------------|
|  |  | Frequency                                 | Percent | Valid Percent | Cumulative Percent |

Supporting Information. Data Analysis. Part 1.

|         |                                                  |       |       |       |       |
|---------|--------------------------------------------------|-------|-------|-------|-------|
| Valid   | Healthcare provider (direct care for patients)   | 26956 | 82,5  | 85,8  | 85,8  |
|         | Support activities (no direct care for patients) | 4478  | 13,7  | 14,2  | 100,0 |
|         | Total                                            | 31434 | 96,2  | 100,0 |       |
| Missing | 999                                              | 1257  | 3,8   |       |       |
| Total   |                                                  | 32691 | 100,0 |       |       |

#### Healthcare provider category

|         |                  | Frequency | Percent | Valid Percent | Cumulative Percent |
|---------|------------------|-----------|---------|---------------|--------------------|
| Valid   | Nurse assistants | 10266     | 31,4    | 38,1          | 38,1               |
|         | Physicians       | 6871      | 21,0    | 25,5          | 63,6               |
|         | Nurses           | 5570      | 17,0    | 20,7          | 84,2               |
|         | Other HCP        | 3230      | 9,9     | 12,0          | 96,2               |
|         | Physiotherapists | 1019      | 3,1     | 3,8           | 100,0              |
|         | Total            | 26956     | 82,5    | 100,0         |                    |
| Missing | 999              | 5735      | 17,5    |               |                    |
| Total   |                  | 32691     | 100,0   |               |                    |

#### Professional categories

|       |                       | Frequency | Percent | Valid Percent | Cumulative Percent |
|-------|-----------------------|-----------|---------|---------------|--------------------|
| Valid | TECNICO EM ENFERMAGEM | 10266     | 31,40   | 31,40         | 31,40              |

## Supporting Information. Data Analysis. Part 1.

|                                     |      |       |       |       |
|-------------------------------------|------|-------|-------|-------|
| MEDICO                              | 6871 | 21,02 | 21,02 | 52,42 |
| ENFERMEIRO                          | 5570 | 17,04 | 17,04 | 69,46 |
| ASSISTENTE ADMINISTRATIVO           | 2440 | 7,46  | 7,46  | 76,92 |
| 999                                 | 1257 | 3,85  | 3,85  | 80,77 |
| TECNICO EM SAUDE                    | 1104 | 3,38  | 3,38  | 84,15 |
| FISIOTERAPEUTA                      | 1019 | 3,12  | 3,12  | 87,26 |
| FARMACEUTICO                        | 604  | 1,85  | 1,85  | 89,11 |
| TECNICO EM RADIOLOGIA               | 548  | 1,68  | 1,68  | 90,79 |
| ANALISTA ADMINISTRATIVO             | 512  | 1,57  | 1,57  | 92,35 |
| TECNICO ADMINISTRATIVO              | 387  | 1,18  | 1,18  | 93,54 |
| PSICOLOGO                           | 264  | ,81   | ,81   | 94,34 |
| ASSISTENTE SOCIAL                   | 263  | ,80   | ,80   | 95,15 |
| NUTRICIONISTA                       | 258  | ,79   | ,79   | 95,94 |
| ANALISTA DE TECNOL DA<br>INFORMACAO | 204  | ,62   | ,62   | 96,56 |
| ENGENHEIRO                          | 202  | ,62   | ,62   | 97,18 |
| FONOAUDIOLOGO                       | 190  | ,58   | ,58   | 97,76 |
| TERAPEUTA OCUPACIONAL               | 136  | ,42   | ,42   | 98,18 |
| CIRURGIAO DENTISTA                  | 126  | ,39   | ,39   | 98,56 |
| BIOMEDICO                           | 107  | ,33   | ,33   | 98,89 |
| ADVOGADO                            | 86   | ,26   | ,26   | 99,15 |
| BIOLOGO                             | 66   | ,20   | ,20   | 99,35 |
| TECNOLOGO                           | 50   | ,15   | ,15   | 99,51 |
| FISICO                              | 49   | ,15   | ,15   | 99,66 |
| EDUCADOR FISICO                     | 45   | ,14   | ,14   | 99,80 |



Supporting Information. Data Analysis. Part 1.

|            |       |       |       |        |
|------------|-------|-------|-------|--------|
| PEDAGOGO   | 40    | ,12   | ,12   | 99,92  |
| JORNALISTA | 14    | ,04   | ,04   | 99,96  |
| ARQUITETO  | 13    | ,04   | ,04   | 100,00 |
| Total      | 32691 | 100,0 | 100,0 |        |

### Institution (workplace)

|       |                                                 | Frequency | Percent | Valid Percent | Cumulative Percent |
|-------|-------------------------------------------------|-----------|---------|---------------|--------------------|
| Valid | HU da Universidade Federal do Maranhão - MA     | 1975      | 6,0     | 6,0           | 6,0                |
|       | CH da Universidade Federal do Ceará - CE        | 1953      | 6,0     | 6,0           | 12,0               |
|       | HC da Universidade Federal de Minas Gerais - MG | 1715      | 5,2     | 5,2           | 17,3               |
|       | CHC da Universidade Federal do Paraná - PR      | 1658      | 5,1     | 5,1           | 22,3               |
|       | HU Professor Edgard Santos - UFBA - BA          | 1563      | 4,8     | 4,8           | 27,1               |
|       | HU de Brasília - UNB - DF                       | 1440      | 4,4     | 4,4           | 31,5               |
|       | HU Onofre Lopes - UFRN - RN                     | 1269      | 3,9     | 3,9           | 35,4               |
|       | HU da Universidade Federal do Piauí - PI        | 1258      | 3,8     | 3,8           | 39,2               |
|       | HU da Universidade Federal de Sergipe - SE      | 1230      | 3,8     | 3,8           | 43,0               |
|       | HU Lauro Wanderley - UFPB - PB                  | 1217      | 3,7     | 3,7           | 46,7               |

|                                                      |      |     |     |      |
|------------------------------------------------------|------|-----|-----|------|
| HU da Universidade Federal de Juiz de Fora - MG      | 1063 | 3,3 | 3,3 | 50,0 |
| HC da Universidade Federal de Pernambuco - PE        | 1061 | 3,2 | 3,2 | 53,2 |
| HU Cassiano Antonio de Moraes - UFES - ES            | 1049 | 3,2 | 3,2 | 56,4 |
| HC da Universidade Federal do Triângulo Mineiro - MG | 1023 | 3,1 | 3,1 | 59,6 |
| HU Maria Aparecida Pedrossian - UFMS - MS            | 948  | 2,9 | 2,9 | 62,5 |
| HU da Universidade Federal de Santa Maria - RS       | 892  | 2,7 | 2,7 | 65,2 |
| HE da Universidade Federal de Pelotas - RS           | 855  | 2,6 | 2,6 | 67,8 |
| HU Professor Alberto Antunes - UFAL - AL             | 840  | 2,6 | 2,6 | 70,4 |
| CHU da Universidade Federal do Pará - UFPA - PA      | 785  | 2,4 | 2,4 | 72,8 |
| HU da Universidade Federal de Grande Dourados - MS   | 726  | 2,2 | 2,2 | 75,0 |
| HE Doutor Washigton Antônio de Barros - UNIVASF - PE | 708  | 2,2 | 2,2 | 77,2 |
| HU Doutor Miguel Riet Corrêa Junior - FURG - RS      | 688  | 2,1 | 2,1 | 79,3 |

|                                                          |       |       |       |       |
|----------------------------------------------------------|-------|-------|-------|-------|
| HC da Universidade Federal de Goiás - GO                 | 634   | 1,9   | 1,9   | 81,2  |
| HU de Lagarto - UFS - SE                                 | 617   | 1,9   | 1,9   | 83,1  |
| Maternidade Climério de Oliveira - UFBA - BA             | 594   | 1,8   | 1,8   | 84,9  |
| Maternidade Escola Januário Cicco - UFRN - RN            | 579   | 1,8   | 1,8   | 86,7  |
| HU da Universidade Federal de Santa Catarina - UFSC - SC | 530   | 1,6   | 1,6   | 88,3  |
| HU Gaffrée e Guinle - UNIRIO - RJ                        | 503   | 1,5   | 1,5   | 89,9  |
| HU Júlio Müller - UFMT - MT                              | 455   | 1,4   | 1,4   | 91,2  |
| HU Antônio Pedro - UFF - RJ                              | 439   | 1,3   | 1,3   | 92,6  |
| HU Getúlio Vargas - UFAM - AM                            | 433   | 1,3   | 1,3   | 93,9  |
| HU Alcides Carneiro - UFCG - PB                          | 425   | 1,3   | 1,3   | 95,2  |
| HU Ana Bezerra - UFRN - RN                               | 385   | 1,2   | 1,2   | 96,4  |
| HU da Universidade Federal de São Carlos - SP            | 338   | 1,0   | 1,0   | 97,4  |
| Sede - DF                                                | 303   | ,9    | ,9    | 98,3  |
| Hospital de Doenças Tropicais - UFT - TO                 | 271   | ,8    | ,8    | 99,2  |
| HU Júlio Bandeira - UFCG - PB                            | 269   | ,8    | ,8    | 100,0 |
| Total                                                    | 32691 | 100,0 | 100,0 |       |

**Country Region**

Supporting Information. Data Analysis. Part 1.

|       |             | Frequency | Percent | Valid Percent | Cumulative Percent |
|-------|-------------|-----------|---------|---------------|--------------------|
| Valid | Northeast   | 15942     | 48,8    | 48,8          | 48,8               |
|       | Southeast   | 6130      | 18,8    | 18,8          | 67,5               |
|       | South       | 4626      | 14,2    | 14,2          | 81,7               |
|       | Center-West | 4504      | 13,8    | 13,8          | 95,4               |
|       | North       | 1489      | 4,6     | 4,6           | 100,0              |
|       | Total       | 32691     | 100,0   | 100,0         |                    |

### Federal State

|       |    | Frequency | Percent | Valid Percent | Cumulative Percent |
|-------|----|-----------|---------|---------------|--------------------|
| Valid | MG | 3801      | 11,6    | 11,6          | 11,6               |
|       | RS | 2436      | 7,5     | 7,5           | 19,1               |
|       | RN | 2232      | 6,8     | 6,8           | 25,9               |
|       | BA | 2157      | 6,6     | 6,6           | 32,5               |
|       | MA | 1974      | 6,0     | 6,0           | 38,5               |
|       | CE | 1954      | 6,0     | 6,0           | 44,5               |
|       | PB | 1911      | 5,8     | 5,8           | 50,4               |
|       | SE | 1847      | 5,6     | 5,6           | 56,0               |
|       | PE | 1769      | 5,4     | 5,4           | 61,4               |
|       | DF | 1743      | 5,3     | 5,3           | 66,8               |
|       | MS | 1673      | 5,1     | 5,1           | 71,9               |
|       | PR | 1659      | 5,1     | 5,1           | 77,0               |
|       | PI | 1258      | 3,8     | 3,8           | 80,8               |

Supporting Information. Data Analysis. Part 1.

|       |       |       |       |       |
|-------|-------|-------|-------|-------|
| ES    | 1049  | 3,2   | 3,2   | 84,0  |
| RJ    | 942   | 2,9   | 2,9   | 86,9  |
| AL    | 840   | 2,6   | 2,6   | 89,5  |
| PA    | 785   | 2,4   | 2,4   | 91,9  |
| GO    | 633   | 1,9   | 1,9   | 93,8  |
| SC    | 531   | 1,6   | 1,6   | 95,4  |
| MT    | 455   | 1,4   | 1,4   | 96,8  |
| AM    | 433   | 1,3   | 1,3   | 98,1  |
| SP    | 338   | 1,0   | 1,0   | 99,2  |
| TO    | 271   | ,8    | ,8    | 100,0 |
| Total | 32691 | 100,0 | 100,0 |       |

|       |                | City      |         |               |                    |
|-------|----------------|-----------|---------|---------------|--------------------|
|       |                | Frequency | Percent | Valid Percent | Cumulative Percent |
| Valid | Salvador       | 2157      | 6,6     | 6,6           | 6,6                |
|       | Sao Luis       | 1974      | 6,0     | 6,0           | 12,6               |
|       | Fortaleza      | 1954      | 6,0     | 6,0           | 18,6               |
|       | Natal          | 1847      | 5,6     | 5,6           | 24,3               |
|       | Brasilia       | 1743      | 5,3     | 5,3           | 29,6               |
|       | Belo Horizonte | 1715      | 5,2     | 5,2           | 34,8               |
|       | Curitiba       | 1659      | 5,1     | 5,1           | 39,9               |
|       | Teresina       | 1258      | 3,8     | 3,8           | 43,8               |
|       | Aracaju        | 1230      | 3,8     | 3,8           | 47,5               |

## Supporting Information. Data Analysis. Part 1.

|                |      |     |     |      |
|----------------|------|-----|-----|------|
| Joao Pessoa    | 1217 | 3,7 | 3,7 | 51,2 |
| Juiz de Fora   | 1063 | 3,3 | 3,3 | 54,5 |
| Recife         | 1061 | 3,2 | 3,2 | 57,7 |
| Vitoria        | 1049 | 3,2 | 3,2 | 61,0 |
| Uberaba        | 1023 | 3,1 | 3,1 | 64,1 |
| Campo Grande   | 948  | 2,9 | 2,9 | 67,0 |
| Santa Maria    | 892  | 2,7 | 2,7 | 69,7 |
| Pelotas        | 855  | 2,6 | 2,6 | 72,3 |
| Maceio         | 840  | 2,6 | 2,6 | 74,9 |
| Belem          | 785  | 2,4 | 2,4 | 77,3 |
| Dourados       | 725  | 2,2 | 2,2 | 79,5 |
| Petrolina      | 708  | 2,2 | 2,2 | 81,7 |
| Rio Grande     | 689  | 2,1 | 2,1 | 83,8 |
| Goiania        | 633  | 1,9 | 1,9 | 85,7 |
| Lagarto        | 617  | 1,9 | 1,9 | 87,6 |
| Florianopolis  | 531  | 1,6 | 1,6 | 89,2 |
| Rio de Janeiro | 503  | 1,5 | 1,5 | 90,8 |
| Cuiaba         | 455  | 1,4 | 1,4 | 92,2 |
| Niteroi        | 439  | 1,3 | 1,3 | 93,5 |
| Manaus         | 433  | 1,3 | 1,3 | 94,8 |
| Campina Grande | 425  | 1,3 | 1,3 | 96,1 |
| Santa Cruz     | 385  | 1,2 | 1,2 | 97,3 |
| Sao Carlos     | 338  | 1,0 | 1,0 | 98,3 |
| Araguaina      | 271  | ,8  | ,8  | 99,2 |

Supporting Information. Data Analysis. Part 1.

|            |       |       |       |       |
|------------|-------|-------|-------|-------|
| Cajazeiras | 269   | ,8    | ,8    | 100,0 |
| Total      | 32691 | 100,0 | 100,0 |       |

\* Custom Tables.

CTABLES

```

/VLABELS VARIABLES=City CityCovCases100k CityCovDeath100k DISPLAY=DEFAULT
/TABLE City BY CityCovCases100k [MEAN] + CityCovDeath100k [MEAN]
/CATEGORIES VARIABLES=City ORDER=A KEY=VALUE EMPTY=EXCLUDE
/CRITERIA CILEVEL=95.

```

## Custom Tables

| City           |  | COVID cases / 100K | Deaths by COVID / |
|----------------|--|--------------------|-------------------|
|                |  | inhab in the city  | 100K inhab in the |
|                |  | Mean               | city              |
|                |  | Mean               | Mean              |
| Aracaju        |  | 4318,79            | 81,73             |
| Araguaina      |  | 3970,19            | 53,75             |
| Belem          |  | 1701,23            | 135,99            |
| Belo Horizonte |  | 807,14             | 21,02             |
| Brasilia       |  | 3107,15            | 44,21             |

## Supporting Information. Data Analysis. Part 1.

|                |         |        |
|----------------|---------|--------|
| Cajazeiras     | 1998,61 | 46,78  |
| Campina Grande | 2598,05 | 55,16  |
| Campo Grande   | 1145,34 | 15,07  |
| Cuiaba         | 1878,55 | 88,81  |
| Curitiba       | 921,11  | 28,71  |
| Dourados       | 1939,91 | 24,67  |
| Florianopolis  | 654,73  | 10,38  |
| Fortaleza      | 1571,70 | 138,24 |
| Goiania        | 1140,09 | 32,06  |
| Joao Pessoa    | 2636,54 | 78,00  |
| Juiz de Fora   | 601,89  | 18,98  |
| Lagarto        | 1580,34 | 43,10  |
| Maceio         | 2198,25 | 70,96  |
| Manaus         | 1630,59 | 92,22  |
| Natal          | 2224,35 | 93,77  |
| Niteroi        | 1767,77 | 60,17  |
| Pelotas        | 264,89  | 4,96   |
| Petrolina      | 679,09  | 15,75  |
| Recife         | 1622,69 | 129,24 |
| Rio de Janeiro | 1061,51 | 123,68 |
| Rio Grande     | 408,52  | 29,38  |
| Salvador       | 1974,73 | 61,10  |
| Santa Cruz     | 821,70  | 17,64  |
| Santa Maria    | 393,80  | 9,22   |



|            |         |        |
|------------|---------|--------|
| Sao Carlos | 520,67  | 8,33   |
| Sao Luis   | 1466,58 | 103,73 |
| Teresina   | 2026,03 | 81,98  |
| Uberaba    | 503,02  | 16,48  |
| Vitoria    | 3107,45 | 97,21  |

\* Custom Tables.

CTABLES

```

/VLABELS VARIABLES=CoVAb CoVAb_N CoVAb_Day DISPLAY=DEFAULT
/TABLE BY CoVAb [C][COUNT F40.0, ROWPCT.COUNT PCT40.1] + CoVAb_N [S][SUM] + CoVAb_Day [S][SUM]
/CATEGORIES VARIABLES=CoVAb [1, 0, OTHERNM] EMPTY=INCLUDE TOTAL=YES POSITION=BEFORE
/CRITERIA CILEVEL=95.
    
```

**Custom Tables: absences due to suspected or confirmed COVID**

| Any work absence due to suspected or confirmed COVID in the period |         |       |         |       |         | Events of work absence due to suspected or confirmed COVID | Duration (days) of work absence due to suspected or confirmed COVID |
|--------------------------------------------------------------------|---------|-------|---------|-------|---------|------------------------------------------------------------|---------------------------------------------------------------------|
| Total                                                              |         | Yes   |         | No    |         |                                                            |                                                                     |
| Count                                                              | Row N % | Count | Row N % | Count | Row N % | Sum                                                        | Sum                                                                 |
| 32691                                                              | 100,0%  | 10994 | 33,6%   | 21697 | 66,4%   | 21295                                                      | 127551                                                              |

\* Custom Tables.

CTABLES

```

/VLABELS VARIABLES=ExtWork ExtWrk_Day DISPLAY=DEFAULT
/TABLE BY ExtWork [C][COUNT F40.0, ROWPCT.COUNT PCT40.1] + ExtWrk_Day [S][SUM]
/CATEGORIES VARIABLES=ExtWork ORDER=A KEY=COUNT EMPTY=INCLUDE TOTAL=YES POSITION=BEFORE
/CRITERIA CILEVEL=95.
    
```

**Custom Tables: assignments to external (remote) work**

| Any assignment to external (remote) work during pandemia |         |       |         |       |         | Duration (days) of external (remote) work during pandemia |
|----------------------------------------------------------|---------|-------|---------|-------|---------|-----------------------------------------------------------|
| Total                                                    |         | Yes   |         | No    |         |                                                           |
| Count                                                    | Row N % | Count | Row N % | Count | Row N % | Sum                                                       |
| 32691                                                    | 100,0%  | 6504  | 19,9%   | 26187 | 80,1%   | 349016                                                    |

```

FREQUENCIES VARIABLES=ExtWrk_5p
/ORDER=ANALYSIS.
    
```

**Frequencies**

### Statistics

Proportion of time assigned to external  
(remote) work during pandemia

|   |         |       |
|---|---------|-------|
| N | Valid   | 32691 |
|   | Missing | 0     |

### Proportion of time assigned to external (remote) work during pandemia

|       |                | Frequency | Percent | Valid Percent | Cumulative Percent |
|-------|----------------|-----------|---------|---------------|--------------------|
| Valid | No time at all | 26187     | 80,1    | 80,1          | 80,1               |
|       | >0% and <=25%  | 3032      | 9,3     | 9,3           | 89,4               |
|       | >25% and <=50% | 1394      | 4,3     | 4,3           | 93,6               |
|       | >50% and <=75% | 1124      | 3,4     | 3,4           | 97,1               |
|       | >75%           | 954       | 2,9     | 2,9           | 100,0              |
|       | Total          | 32691     | 100,0   | 100,0         |                    |

\* Custom Tables.

CTABLES

```
/VLABELS VARIABLES=AbsType AsgnGrp DISPLAY=DEFAULT
```

```
/TABLE AbsType [C][COUNT F40.0, COLPCT.COUNT PCT40.1] BY AsgnGrp [C]
```

```
/CATEGORIES VARIABLES=AbsType [2, 1, 4, 3, 10, 8, 5] EMPTY=INCLUDE TOTAL=YES POSITION=AFTER
```

```
/CATEGORIES VARIABLES=AsgnGrp ORDER=A KEY=VALUE EMPTY=INCLUDE
```

```
/CRITERIA CILEVEL=95.
```

Comparisons between exposed and non-exposed individuals as to types (or causes) of work absence in the general sample

### Custom Tables: events of work absence (non-COVID)

|                                       |                                                             | Exposure to the pandemia environment |            |                |            |
|---------------------------------------|-------------------------------------------------------------|--------------------------------------|------------|----------------|------------|
|                                       |                                                             | Non-Exposed (2019)                   |            | Exposed (2020) |            |
|                                       |                                                             | Count                                | Column N % | Count          | Column N % |
| Absence type (general classification) | Health-Related                                              | 29301                                | 70,7%      | 20473          | 70,1%      |
|                                       | Administrative                                              | 8335                                 | 20,1%      | 5552           | 19,0%      |
|                                       | Wedding, maternity, paternity or adoption leaves            | 1819                                 | 4,4%       | 1636           | 5,6%       |
|                                       | Family member illness or death                              | 934                                  | 2,3%       | 812            | 2,8%       |
|                                       | Blood donation                                              | 742                                  | 1,8%       | 522            | 1,8%       |
|                                       | Abortion (complete, failed or threat) and its complications | 197                                  | 0,5%       | 147            | 0,5%       |
|                                       | Occupational accidents                                      | 141                                  | 0,3%       | 75             | 0,3%       |
|                                       | Total                                                       | 41469                                | 100,0%     | 29217          | 100,0%     |

SET TLook=None Small=0.0001 SUMMARY=None THREADS=AUTO TFit=Both DIGITGROUPING=No LEADZERO=No TABLERENDER=light.  
CROSSTABS

Supporting Information. Data Analysis. Part 1.

```

/TABLES=AsgnGrp BY AbAC AbADM AbHRel AbMnt AbFam AbAbor AbBLD AbAcid AbWMPA
/FORMAT=AVALUE TABLES
/STATISTICS=RISK
/CELLS=COUNT ROW TOTAL
/COUNT ROUND CELL.

```

## Crosstabs

[DataSet4] C:\Users\trabalho\Documents\COVID-19\Centro Pesquisa HUB COVID19\BDForceII\_AbsperInd\_Vertic.sav

### Case Processing Summary

|                                                                                                  | Valid |         | Cases Missing |         | Total |         |
|--------------------------------------------------------------------------------------------------|-------|---------|---------------|---------|-------|---------|
|                                                                                                  | N     | Percent | N             | Percent | N     | Percent |
| Exposure to the pandemia environment * Any work absence due to ALL CAUSES occurred in the period | 65382 | 100,0%  | 0             | 0,0%    | 65382 | 100,0%  |

## Supporting Information. Data Analysis. Part 1.

|                                                                                                                      |       |        |   |      |       |        |
|----------------------------------------------------------------------------------------------------------------------|-------|--------|---|------|-------|--------|
| Exposure to the pandemia environment * Any work absence due to ADMINISTRATIVE CAUSES occurred in the period          | 65382 | 100,0% | 0 | 0,0% | 65382 | 100,0% |
| Exposure to the pandemia environment * Any work absence due to HEALTH-RELATED CAUSES occurred in the period          | 65382 | 100,0% | 0 | 0,0% | 65382 | 100,0% |
| Exposure to the pandemia environment * Any work absence due to MENTAL DISEASE occurred in the period                 | 65382 | 100,0% | 0 | 0,0% | 65382 | 100,0% |
| Exposure to the pandemia environment * Any work absence due to FAMILY member's illness or death in the period        | 65382 | 100,0% | 0 | 0,0% | 65382 | 100,0% |
| Exposure to the pandemia environment * Any work absence due to ABORTION and its complications occurred in the period | 65382 | 100,0% | 0 | 0,0% | 65382 | 100,0% |
| Exposure to the pandemia environment * Any work absence due to BLOOD DONATION occurred in the period                 | 65382 | 100,0% | 0 | 0,0% | 65382 | 100,0% |

|                                                                                                                                    |       |        |   |      |       |        |
|------------------------------------------------------------------------------------------------------------------------------------|-------|--------|---|------|-------|--------|
| Exposure to the pandemia environment * Any work absence due to OCCUPATIONAL ACCIDENTS occurred in the period                       | 65382 | 100,0% | 0 | 0,0% | 65382 | 100,0% |
| Exposure to the pandemia environment * Any work absence due to wedding, maternity, paternity or adoption leaves in the period - T1 | 65382 | 100,0% | 0 | 0,0% | 65382 | 100,0% |

**Exposure to the pandemia environment \* Any work absence due to ALL CAUSES occurred in the period**

**Crosstab**

|                                      |                    | Any work absence due to ALL CAUSES occurred in the period |       | Total |        |
|--------------------------------------|--------------------|-----------------------------------------------------------|-------|-------|--------|
|                                      |                    | No                                                        | Yes   |       |        |
| Exposure to the pandemia environment | Non-Exposed (2019) | Count                                                     | 15917 | 16774 | 32691  |
|                                      |                    | % within Exposure to the pandemia environment             | 48,7% | 51,3% | 100,0% |
|                                      |                    | % of Total                                                | 24,3% | 25,7% | 50,0%  |
|                                      | Exposed (2020)     | Count                                                     | 18430 | 14261 | 32691  |

|       |                                               |       |       |        |
|-------|-----------------------------------------------|-------|-------|--------|
|       | % within Exposure to the pandemia environment | 56,4% | 43,6% | 100,0% |
|       | % of Total                                    | 28,2% | 21,8% | 50,0%  |
| Total | Count                                         | 34347 | 31035 | 65382  |
|       | % within Exposure to the pandemia environment | 52,5% | 47,5% | 100,0% |
|       | % of Total                                    | 52,5% | 47,5% | 100,0% |

**Risk Estimate**

|                                                                                           | Value | 95% Confidence Interval |       |
|-------------------------------------------------------------------------------------------|-------|-------------------------|-------|
|                                                                                           |       | Lower                   | Upper |
| Odds Ratio for Exposure to the pandemia environment (Non-Exposed (2019) / Exposed (2020)) | ,734  | ,712                    | ,757  |
| For cohort Any work absence due to ALL CAUSES occurred in the period = No                 | ,864  | ,851                    | ,876  |
| For cohort Any work absence due to ALL CAUSES occurred in the period = Yes                | 1,176 | 1,157                   | 1,195 |
| N of Valid Cases                                                                          | 65382 |                         |       |



**Exposure to the pandemia environment \* Any work absence due to ADMINISTRATIVE CAUSES occurred in the period**

**Crosstab**

|                                         |                                                  |                                                  | Any work absence due to<br>ADMINISTRATIVE CAUSES occurred in<br>the period |        | Total  |
|-----------------------------------------|--------------------------------------------------|--------------------------------------------------|----------------------------------------------------------------------------|--------|--------|
|                                         |                                                  |                                                  | No                                                                         | Yes    |        |
| Exposure to the pandemia<br>environment | Non-Exposed (2019)                               | Count                                            | 28351                                                                      | 4340   | 32691  |
|                                         |                                                  | % within Exposure to the pandemia<br>environment | 86,7%                                                                      | 13,3%  | 100,0% |
|                                         |                                                  | % of Total                                       | 43,4%                                                                      | 6,6%   | 50,0%  |
|                                         | Exposed (2020)                                   | Count                                            | 29833                                                                      | 2858   | 32691  |
|                                         |                                                  | % within Exposure to the pandemia<br>environment | 91,3%                                                                      | 8,7%   | 100,0% |
|                                         |                                                  | % of Total                                       | 45,6%                                                                      | 4,4%   | 50,0%  |
| Total                                   | Count                                            | 58184                                            | 7198                                                                       | 65382  |        |
|                                         | % within Exposure to the pandemia<br>environment | 89,0%                                            | 11,0%                                                                      | 100,0% |        |
|                                         | % of Total                                       | 89,0%                                            | 11,0%                                                                      | 100,0% |        |

|                                                                                           | Risk Estimate |                         |       |
|-------------------------------------------------------------------------------------------|---------------|-------------------------|-------|
|                                                                                           | Value         | 95% Confidence Interval |       |
|                                                                                           |               | Lower                   | Upper |
| Odds Ratio for Exposure to the pandemic environment (Non-Exposed (2019) / Exposed (2020)) | ,626          | ,595                    | ,658  |
| For cohort Any work absence due to ADMINISTRATIVE CAUSES occurred in the period = No      | ,950          | ,945                    | ,955  |
| For cohort Any work absence due to ADMINISTRATIVE CAUSES occurred in the period = Yes     | 1,519         | 1,452                   | 1,588 |
| N of Valid Cases                                                                          | 65382         |                         |       |

**Exposure to the pandemic environment \* Any work absence due to HEALTH-RELATED CAUSES occurred in the period**

**Crosstab**

| Any work absence due to HEALTH-RELATED CAUSES occurred in the period |     | Total |
|----------------------------------------------------------------------|-----|-------|
| No                                                                   | Yes |       |
|                                                                      |     |       |

Supporting Information. Data Analysis. Part 1.

|                                      |                                               |                                               |       |        |        |
|--------------------------------------|-----------------------------------------------|-----------------------------------------------|-------|--------|--------|
| Exposure to the pandemia environment | Non-Exposed (2019)                            | Count                                         | 19427 | 13264  | 32691  |
|                                      |                                               | % within Exposure to the pandemia environment | 59,4% | 40,6%  | 100,0% |
|                                      |                                               | % of Total                                    | 29,7% | 20,3%  | 50,0%  |
|                                      | Exposed (2020)                                | Count                                         | 21542 | 11149  | 32691  |
|                                      |                                               | % within Exposure to the pandemia environment | 65,9% | 34,1%  | 100,0% |
|                                      |                                               | % of Total                                    | 32,9% | 17,1%  | 50,0%  |
| Total                                | Count                                         | 40969                                         | 24413 | 65382  |        |
|                                      | % within Exposure to the pandemia environment | 62,7%                                         | 37,3% | 100,0% |        |
|                                      | % of Total                                    | 62,7%                                         | 37,3% | 100,0% |        |

**Risk Estimate**

|                                                                                           | Value | 95% Confidence Interval |       |
|-------------------------------------------------------------------------------------------|-------|-------------------------|-------|
|                                                                                           |       | Lower                   | Upper |
| Odds Ratio for Exposure to the pandemia environment (Non-Exposed (2019) / Exposed (2020)) | ,758  | ,734                    | ,783  |
| For cohort Any work absence due to HEALTH-RELATED CAUSES occurred in the period = No      | ,902  | ,891                    | ,913  |

|                                                                                       |       |       |       |
|---------------------------------------------------------------------------------------|-------|-------|-------|
| For cohort Any work absence due to HEALTH-RELATED CAUSES occurred in the period = Yes | 1,190 | 1,166 | 1,214 |
| N of Valid Cases                                                                      | 65382 |       |       |

**Exposure to the pandemia environment \* Any work absence due to FAMILY member's illness or death in the period**

**Crosstab**

|                                      |                    |                                               | Any work absence due to FAMILY member's illness or death in the period |      | Total  |
|--------------------------------------|--------------------|-----------------------------------------------|------------------------------------------------------------------------|------|--------|
|                                      |                    |                                               | No                                                                     | Yes  |        |
| Exposure to the pandemia environment | Non-Exposed (2019) | Count                                         | 31780                                                                  | 911  | 32691  |
|                                      |                    | % within Exposure to the pandemia environment | 97,2%                                                                  | 2,8% | 100,0% |
|                                      |                    | % of Total                                    | 48,6%                                                                  | 1,4% | 50,0%  |
|                                      | Exposed (2020)     | Count                                         | 31905                                                                  | 786  | 32691  |
|                                      |                    | % within Exposure to the pandemia environment | 97,6%                                                                  | 2,4% | 100,0% |
|                                      |                    | % of Total                                    | 48,8%                                                                  | 1,2% | 50,0%  |
| Total                                |                    | Count                                         | 63685                                                                  | 1697 | 65382  |

|  |                                               |       |      |        |
|--|-----------------------------------------------|-------|------|--------|
|  | % within Exposure to the pandemia environment | 97,4% | 2,6% | 100,0% |
|  | % of Total                                    | 97,4% | 2,6% | 100,0% |

**Risk Estimate**

|                                                                                           | Value | 95% Confidence Interval |       |
|-------------------------------------------------------------------------------------------|-------|-------------------------|-------|
|                                                                                           |       | Lower                   | Upper |
| Odds Ratio for Exposure to the pandemia environment (Non-Exposed (2019) / Exposed (2020)) | ,859  | ,780                    | ,947  |
| For cohort Any work absence due to FAMILY member's illness or death in the period = No    | ,996  | ,994                    | ,999  |
| For cohort Any work absence due to FAMILY member's illness or death in the period = Yes   | 1,159 | 1,055                   | 1,273 |
| N of Valid Cases                                                                          | 65382 |                         |       |

**Exposure to the pandemia environment \* Any work absence due to BLOOD DONATION occurred in the period**

**Crosstab**

|                                      |                                               |                                               | Any work absence due to BLOOD DONATION occurred in the period |        | Total  |
|--------------------------------------|-----------------------------------------------|-----------------------------------------------|---------------------------------------------------------------|--------|--------|
|                                      |                                               |                                               | No                                                            | Yes    |        |
| Exposure to the pandemia environment | Non-Exposed (2019)                            | Count                                         | 31953                                                         | 738    | 32691  |
|                                      |                                               | % within Exposure to the pandemia environment | 97,7%                                                         | 2,3%   | 100,0% |
|                                      |                                               | % of Total                                    | 48,9%                                                         | 1,1%   | 50,0%  |
|                                      | Exposed (2020)                                | Count                                         | 32176                                                         | 515    | 32691  |
|                                      |                                               | % within Exposure to the pandemia environment | 98,4%                                                         | 1,6%   | 100,0% |
|                                      |                                               | % of Total                                    | 49,2%                                                         | 0,8%   | 50,0%  |
| Total                                | Count                                         | 64129                                         | 1253                                                          | 65382  |        |
|                                      | % within Exposure to the pandemia environment | 98,1%                                         | 1,9%                                                          | 100,0% |        |
|                                      | % of Total                                    | 98,1%                                         | 1,9%                                                          | 100,0% |        |

**Risk Estimate**

|                                                                                           | Value | 95% Confidence Interval |       |
|-------------------------------------------------------------------------------------------|-------|-------------------------|-------|
|                                                                                           |       | Lower                   | Upper |
| Odds Ratio for Exposure to the pandemia environment (Non-Exposed (2019) / Exposed (2020)) | ,693  | ,619                    | ,776  |

Supporting Information. Data Analysis. Part 1.

|                                                                                |       |       |       |
|--------------------------------------------------------------------------------|-------|-------|-------|
| For cohort Any work absence due to BLOOD DONATION occurred in the period = No  | ,993  | ,991  | ,995  |
| For cohort Any work absence due to BLOOD DONATION occurred in the period = Yes | 1,433 | 1,282 | 1,602 |
| N of Valid Cases                                                               | 65382 |       |       |

### Exposure to the pandemia environment \* Any work absence due to OCCUPATIONAL ACCIDENTS occurred in the period

#### Crosstab

|                                      |                    | Any work absence due to OCCUPATIONAL ACCIDENTS occurred in the period |       |       |        |
|--------------------------------------|--------------------|-----------------------------------------------------------------------|-------|-------|--------|
|                                      |                    | No                                                                    | Yes   | Total |        |
| Exposure to the pandemia environment | Non-Exposed (2019) | Count                                                                 | 32603 | 88    | 32691  |
|                                      |                    | % within Exposure to the pandemia environment                         | 99,7% | 0,3%  | 100,0% |
|                                      | % of Total         | 49,9%                                                                 | 0,1%  | 50,0% |        |
|                                      | Exposed (2020)     | Count                                                                 | 32645 | 46    | 32691  |

|       |                                               |       |      |        |
|-------|-----------------------------------------------|-------|------|--------|
|       | % within Exposure to the pandemia environment | 99,9% | 0,1% | 100,0% |
|       | % of Total                                    | 49,9% | 0,1% | 50,0%  |
| Total | Count                                         | 65248 | 134  | 65382  |
|       | % within Exposure to the pandemia environment | 99,8% | 0,2% | 100,0% |
|       | % of Total                                    | 99,8% | 0,2% | 100,0% |

**Risk Estimate**

|                                                                                           | Value | 95% Confidence Interval |       |
|-------------------------------------------------------------------------------------------|-------|-------------------------|-------|
|                                                                                           |       | Lower                   | Upper |
| Odds Ratio for Exposure to the pandemia environment (Non-Exposed (2019) / Exposed (2020)) | ,522  | ,365                    | ,746  |
| For cohort Any work absence due to OCCUPATIONAL ACCIDENTS occurred in the period = No     | ,999  | ,998                    | ,999  |
| For cohort Any work absence due to OCCUPATIONAL ACCIDENTS occurred in the period = Yes    | 1,913 | 1,340                   | 2,732 |
| N of Valid Cases                                                                          | 65382 |                         |       |



**Exposure to the pandemia environment \* Any work absence due to wedding, maternity, paternity or adoption leaves in the period**

**Crosstab**

|                                      |                                               | Any work absence due to wedding,<br>maternity, paternity or adoption leaves in<br>the period |       |        |        |
|--------------------------------------|-----------------------------------------------|----------------------------------------------------------------------------------------------|-------|--------|--------|
|                                      |                                               | No                                                                                           | Yes   | Total  |        |
| Exposure to the pandemia environment | Non-Exposed (2019)                            | Count                                                                                        | 31218 | 1473   | 32691  |
|                                      |                                               | % within Exposure to the pandemia environment                                                | 95,5% | 4,5%   | 100,0% |
|                                      |                                               | % of Total                                                                                   | 47,7% | 2,3%   | 50,0%  |
|                                      | Exposed (2020)                                | Count                                                                                        | 31343 | 1348   | 32691  |
|                                      |                                               | % within Exposure to the pandemia environment                                                | 95,9% | 4,1%   | 100,0% |
|                                      |                                               | % of Total                                                                                   | 47,9% | 2,1%   | 50,0%  |
| Total                                | Count                                         | 62561                                                                                        | 2821  | 65382  |        |
|                                      | % within Exposure to the pandemia environment | 95,7%                                                                                        | 4,3%  | 100,0% |        |
|                                      | % of Total                                    | 95,7%                                                                                        | 4,3%  | 100,0% |        |

**Risk Estimate**

Supporting Information. Data Analysis. Part 1.

|                                                                                                               | Value | 95% Confidence Interval |       |
|---------------------------------------------------------------------------------------------------------------|-------|-------------------------|-------|
|                                                                                                               |       | Lower                   | Upper |
| Odds Ratio for Exposure to the<br>pandemia environment (Non-<br>Exposed (2019) / Exposed (2020))              | ,911  | ,845                    | ,983  |
| For cohort Any work absence due<br>to wedding, maternity, paternity or<br>adoption leaves in the period = No  | ,996  | ,993                    | ,999  |
| For cohort Any work absence due<br>to wedding, maternity, paternity or<br>adoption leaves in the period = Yes | 1,093 | 1,017                   | 1,175 |
| N of Valid Cases                                                                                              | 65382 |                         |       |

CROSSTABS

```

/TABLES=AsgnGrp BY AbAbor
/FORMAT=AVALUE TABLES
/STATISTICS=RISK
/CELLS=COUNT ROW TOTAL
/COUNT ROUND CELL.

```

**Crosstabs: Abortion - only women under 45 years of age considered**

[BDForceII\_Under45]

**Case Processing Summary**

|                                                                                                                      | Valid |         | Cases Missing |         | Total |         |
|----------------------------------------------------------------------------------------------------------------------|-------|---------|---------------|---------|-------|---------|
|                                                                                                                      | N     | Percent | N             | Percent | N     | Percent |
| Exposure to the pandemia environment * Any work absence due to ABORTION and its complications occurred in the period | 37678 | 100,0%  | 0             | 0,0%    | 37678 | 100,0%  |

**Exposure to the pandemia environment \* Any work absence due to ABORTION and its complications occurred in the period  
Crosstabulation**

|                                      |                    | Any work absence due to ABORTION and its complications occurred in the period |        |       |        |
|--------------------------------------|--------------------|-------------------------------------------------------------------------------|--------|-------|--------|
|                                      |                    | No                                                                            | Yes    | Total |        |
| Exposure to the pandemia environment | Non-Exposed (2019) | Count                                                                         | 18686  | 153   | 18839  |
|                                      |                    | % within Exposure to the pandemia environment                                 | 99,19% | 0,81% | 100,0% |
|                                      |                    | % of Total                                                                    | 49,59% | 0,41% | 50,0%  |
| Exposure to the pandemia environment | Exposed (2020)     | Count                                                                         | 18721  | 118   | 18839  |
|                                      |                    | % within Exposure to the pandemia environment                                 | 99,37% | 0,63% | 100,0% |

|       |                                               |        |       |        |
|-------|-----------------------------------------------|--------|-------|--------|
|       | % of Total                                    | 49,69% | 0,31% | 50,0%  |
| Total | Count                                         | 37407  | 271   | 37678  |
|       | % within Exposure to the pandemia environment | 99,3%  | 0,7%  | 100,0% |
|       | % of Total                                    | 99,3%  | 0,7%  | 100,0% |

**Risk Estimate**

|                                                                                                | Value | 95% Confidence Interval |       |
|------------------------------------------------------------------------------------------------|-------|-------------------------|-------|
|                                                                                                |       | Lower                   | Upper |
| Odds Ratio for Exposure to the pandemia environment (Non-Exposed (2019) / Exposed (2020))      | ,770  | ,605                    | ,980  |
| For cohort Any work absence due to ABORTION and its complications occurred in the period = No  | ,998  | ,996                    | 1,000 |
| For cohort Any work absence due to ABORTION and its complications occurred in the period = Yes | 1,297 | 1,021                   | 1,647 |
| N of Valid Cases                                                                               | 37678 |                         |       |

```

DATASET COPY BDForceII_FemaleUnder45.
DATASET ACTIVATE BDForceII_FemaleUnder45.
FILTER OFF.
USE ALL.
SELECT IF (Sex = 0).
    
```

Supporting Information. Data Analysis. Part 1.

```
EXECUTE.
DATASET ACTIVATE BDForceII_Under45.
DATASET ACTIVATE BDForceII_FemaleUnder45.
USE ALL.
COMPUTE filter_$=(CoVAb = 1).
VARIABLE LABELS filter_$ 'CoVAb = 1 (FILTER)'.
VALUE LABELS filter_$ 0 'Not Selected' 1 'Selected'.
FORMATS filter_$ (f1.0).
FILTER BY filter_$.
EXECUTE.
CROSSTABS
  /TABLES=AsgnGrp BY AbAbor
  /FORMAT=AVALUE TABLES
  /STATISTICS=RISK
  /CELLS=COUNT ROW TOTAL
  /COUNT ROUND CELL.
```

**Crosstabs:** only women under 45 years of age who had at least one absence due to suspect or confirmed COVID

[BDForceII\_FemaleUnder45]

### Case Processing Summary

| Valid |         | Cases<br>Missing |         | Total |         |
|-------|---------|------------------|---------|-------|---------|
| N     | Percent | N                | Percent | N     | Percent |
|       |         |                  |         |       |         |

|                                                                                                                      |       |        |   |      |       |        |
|----------------------------------------------------------------------------------------------------------------------|-------|--------|---|------|-------|--------|
| Exposure to the pandemia environment * Any work absence due to ABORTION and its complications occurred in the period | 13650 | 100,0% | 0 | 0,0% | 13650 | 100,0% |
|----------------------------------------------------------------------------------------------------------------------|-------|--------|---|------|-------|--------|

**Exposure to the pandemia environment \* Any work absence due to ABORTION and its complications occurred in the period**  
**Crosstabulation**

|                                      |                                               | Any work absence due to ABORTION and its complications occurred in the period |        | Total  |        |
|--------------------------------------|-----------------------------------------------|-------------------------------------------------------------------------------|--------|--------|--------|
|                                      |                                               | No                                                                            | Yes    |        |        |
| Exposure to the pandemia environment | Non-Exposed (2019)                            | Count                                                                         | 6785   | 40     | 6825   |
|                                      |                                               | % within Exposure to the pandemia environment                                 | 99,41% | 0,59%  | 100,0% |
|                                      |                                               | % of Total                                                                    | 49,71% | 0,29%  | 50,0%  |
|                                      | Exposed (2020)                                | Count                                                                         | 6788   | 37     | 6825   |
|                                      |                                               | % within Exposure to the pandemia environment                                 | 99,46% | 0,54%  | 100,0% |
|                                      |                                               | % of Total                                                                    | 49,73% | 0,27%  | 50,0%  |
| Total                                | Count                                         | 13573                                                                         | 77     | 13650  |        |
|                                      | % within Exposure to the pandemia environment | 99,4%                                                                         | 0,6%   | 100,0% |        |
|                                      | % of Total                                    | 99,4%                                                                         | 0,6%   | 100,0% |        |

Supporting Information. Data Analysis. Part 1.

### Risk Estimate

|                                                                                                      | Value | 95% Confidence Interval |       |
|------------------------------------------------------------------------------------------------------|-------|-------------------------|-------|
|                                                                                                      |       | Lower                   | Upper |
| Odds Ratio for Exposure to the<br>pandemia environment (Non-<br>Exposed (2019) / Exposed (2020))     | ,925  | ,591                    | 1,448 |
| For cohort Any work absence due<br>to ABORTION and its complications<br>occurred in the period = No  | 1,000 | ,997                    | 1,002 |
| For cohort Any work absence due<br>to ABORTION and its complications<br>occurred in the period = Yes | 1,081 | ,692                    | 1,688 |
| N of Valid Cases                                                                                     | 13650 |                         |       |

```

DATASET ACTIVATE DataSet2.
FILTER OFF.
USE ALL.
EXECUTE.
DATASET ACTIVATE DataSet1.
DATASET COPY BDForceII_Under45_Horiz.
DATASET ACTIVATE BDForceII_Under45_Horiz.
FILTER OFF.
USE ALL.
SELECT IF (Age <= 45).
EXECUTE.
DATASET ACTIVATE DataSet1.
DATASET ACTIVATE BDForceII_Under45_Horiz.
USE ALL.
COMPUTE filter_$=(Sex = 0).

```

Supporting Information. Data Analysis. Part 1.

```
VARIABLE LABELS filter_$ 'Sex = 0 (FILTER)'.
VALUE LABELS filter_$ 0 'Not Selected' 1 'Selected'.
FORMATS filter_$ (f1.0).
FILTER BY filter_$.
EXECUTE.
CROSSTABS
  /TABLES=AbAbor_T1 BY AbAbor_T2
  /FORMAT=AVALUE TABLES
  /STATISTICS=MCNEMAR
  /CELLS=COUNT
  /COUNT ROUND CELL.
```

## Crosstabs: only women under 45 years of age

[BDForceII\_Under45\_Horiz]

| Case Processing Summary |         |       |         |       |         |
|-------------------------|---------|-------|---------|-------|---------|
|                         |         | Cases |         |       |         |
|                         |         | Valid | Missing | Total |         |
| N                       | Percent | N     | Percent | N     | Percent |
|                         |         |       |         |       |         |



|                                                                                                                                                                         |       |        |   |      |       |        |
|-------------------------------------------------------------------------------------------------------------------------------------------------------------------------|-------|--------|---|------|-------|--------|
| Any work absence due to ABORTION and its complications occurred in the period - T1 * Any work absence due to ABORTION and its complications occurred in the period - T2 | 18839 | 100,0% | 0 | 0,0% | 18839 | 100,0% |
|-------------------------------------------------------------------------------------------------------------------------------------------------------------------------|-------|--------|---|------|-------|--------|

**Any work absence due to ABORTION and its complications occurred in the period - T1 \* Any work absence due to ABORTION and its complications occurred in the period - T2 Crosstabulation**

Count

|                                                                                    |     | Any work absence due to ABORTION and its complications occurred in the period - T2 |     | Total |
|------------------------------------------------------------------------------------|-----|------------------------------------------------------------------------------------|-----|-------|
|                                                                                    |     | No                                                                                 | Yes |       |
| Any work absence due to ABORTION and its complications occurred in the period - T1 | No  | 18576                                                                              | 110 | 18686 |
|                                                                                    | Yes | 145                                                                                | 8   | 153   |
| Total                                                                              |     | 18721                                                                              | 118 | 18839 |

**Chi-Square Tests**

|              | Value | Exact Sig. (2-sided) |
|--------------|-------|----------------------|
| McNemar Test |       | ,033 <sup>a</sup>    |

Supporting Information. Data Analysis. Part 1.

|                  |       |
|------------------|-------|
| N of Valid Cases | 18839 |
|------------------|-------|

a. Binomial distribution used.

```

DATASET COPY BDForceII_WomenUnder45_Horiz.
DATASET ACTIVATE BDForceII_WomenUnder45_Horiz.
FILTER OFF.
USE ALL.
SELECT IF (Sex = 0).
EXECUTE.
DATASET ACTIVATE BDForceII_Under45_Horiz.
DATASET ACTIVATE BDForceII_WomenUnder45_Horiz.
USE ALL.
COMPUTE filter_$=(CoVAb = 1).
VARIABLE LABELS filter_$ 'CoVAb = 1 (FILTER)'.
VALUE LABELS filter_$ 0 'Not Selected' 1 'Selected'.
FORMATS filter_$ (f1.0).
FILTER BY filter_$.
EXECUTE.
CROSSTABS
  /TABLES=AbAbor_T1 BY AbAbor_T2
  /FORMAT=AVALUE TABLES
  /STATISTICS=MCNEMAR
  /CELLS=COUNT
  /COUNT ROUND CELL.

```

**Crosstabs:** only women under 45 years of age who had at least 01 absence due to suspect or confirmed COVID

[BDForceII\_WomenUnder45\_Horiz]

**Case Processing Summary**

|                                                                                                                                                                         | Valid |         | Cases Missing |         | Total |         |
|-------------------------------------------------------------------------------------------------------------------------------------------------------------------------|-------|---------|---------------|---------|-------|---------|
|                                                                                                                                                                         | N     | Percent | N             | Percent | N     | Percent |
| Any work absence due to ABORTION and its complications occurred in the period - T1 * Any work absence due to ABORTION and its complications occurred in the period - T2 | 6825  | 100,0%  | 0             | 0,0%    | 6825  | 100,0%  |

**Any work absence due to ABORTION and its complications occurred in the period - T1 \* Any work absence due to ABORTION and its complications occurred in the period - T2 Crosstabulation**

Count

|                                                                                    |     | Any work absence due to ABORTION and its complications occurred in the period - T2 |     | Total |
|------------------------------------------------------------------------------------|-----|------------------------------------------------------------------------------------|-----|-------|
|                                                                                    |     | No                                                                                 | Yes |       |
| Any work absence due to ABORTION and its complications occurred in the period - T1 | No  | 6749                                                                               | 36  | 6785  |
|                                                                                    | Yes | 39                                                                                 | 1   | 40    |

|       |      |    |      |
|-------|------|----|------|
| Total | 6788 | 37 | 6825 |
|-------|------|----|------|

### Chi-Square Tests

|                  | Value | Exact Sig. (2-sided) |
|------------------|-------|----------------------|
| McNemar Test     |       | ,818 <sup>a</sup>    |
| N of Valid Cases | 6825  |                      |

a. Binomial distribution used.

```

DATASET ACTIVATE DataSet1.
DATASET CLOSE BDForceII_WomenUnder45_Horiz.
DATASET CLOSE BDForceII_Under45_Horiz.
DATASET CLOSE BDForceII_FemaleUnder45.
DATASET CLOSE BDForceII_Under45.
FILTER OFF.
USE ALL.
EXECUTE.
FILTER OFF.
USE ALL.
EXECUTE.
DATASET ACTIVATE DataSet2.
FILTER OFF.
USE ALL.
EXECUTE.
DATASET ACTIVATE DataSet1.
DATASET ACTIVATE DataSet1.

SAVE OUTFILE='C:\Users\trabalho\Documents\COVID-19\Centro Pesquisa HUB '+
'COVID19\BDForceII_AbsperInd_Horiz.sav'
/COMPRESSED.
DATASET ACTIVATE DataSet2.
DATASET ACTIVATE DataSet2.

```

Supporting Information. Data Analysis. Part 1.

```

SAVE OUTFILE='C:\Users\trabalho\Documents\COVID-19\Centro Pesquisa HUB '+
  'COVID19\BDForceII_AbsperInd_Vertic.sav'
  /COMPRESSED.
DATASET ACTIVATE DataSet1.
CROSSTABS
  /TABLES=AbAC_T1 BY AbAC_T2
  /FORMAT=AVALUE TABLES
  /STATISTICS=MCNEMAR
  /CELLS=COUNT
  /COUNT ROUND CELL.

```

## Crosstabs

### Case Processing Summary

|                                                                                                                                 | Valid |         | Cases Missing |         | Total |         |
|---------------------------------------------------------------------------------------------------------------------------------|-------|---------|---------------|---------|-------|---------|
|                                                                                                                                 | N     | Percent | N             | Percent | N     | Percent |
| Any work absence due to ALL CAUSES occurred in the period - T1 * Any work absence due to ALL CAUSES occurred in the period - T2 | 32691 | 100,0%  | 0             | 0,0%    | 32691 | 100,0%  |

**Any work absence due to ALL CAUSES occurred in the period - T1 \* Any work absence due to ALL CAUSES occurred in the period - T2 Crosstabulation**

Count

|                                                                      |     | Any work absence due to ALL CAUSES<br>occurred in the period - T2 |       | Total |
|----------------------------------------------------------------------|-----|-------------------------------------------------------------------|-------|-------|
|                                                                      |     | No                                                                | Yes   |       |
| Any work absence due to ALL<br>CAUSES occurred in the period -<br>T1 | No  | 10819                                                             | 5098  | 15917 |
|                                                                      | Yes | 7611                                                              | 9163  | 16774 |
| Total                                                                |     | 18430                                                             | 14261 | 32691 |

**Chi-Square Tests**

|                  | Value | Exact Sig. (2-sided) |
|------------------|-------|----------------------|
| McNemar Test     |       | ,000 <sup>a</sup>    |
| N of Valid Cases | 32691 |                      |

a. Binomial distribution used.

CROSSTABS

```

/TABLES=AbADM_T1 BY AbADM_T2
/FORMAT=AVALUE TABLES
/STATISTICS=MCNEMAR
/CELLS=COUNT
/COUNT ROUND CELL.

```

**Crosstabs**

**Case Processing Summary**

|                                                                                                                                                       | Valid |         | Cases Missing |         | Total |         |
|-------------------------------------------------------------------------------------------------------------------------------------------------------|-------|---------|---------------|---------|-------|---------|
|                                                                                                                                                       | N     | Percent | N             | Percent | N     | Percent |
| Any work absence due to ADMINISTRATIVE CAUSES occurred in the period - T1 * Any work absence due to ADMINISTRATIVE CAUSES occurred in the period - T2 | 32691 | 100,0%  | 0             | 0,0%    | 32691 | 100,0%  |

**Any work absence due to ADMINISTRATIVE CAUSES occurred in the period - T1 \***

**Any work absence due to ADMINISTRATIVE CAUSES occurred in the period - T2**

**Crosstabulation**

Count

Supporting Information. Data Analysis. Part 1.

|                                                                                 |     | Any work absence due to<br>ADMINISTRATIVE CAUSES occurred in<br>the period - T2 |      | Total |
|---------------------------------------------------------------------------------|-----|---------------------------------------------------------------------------------|------|-------|
|                                                                                 |     | No                                                                              | Yes  |       |
| Any work absence due to<br>ADMINISTRATIVE CAUSES<br>occurred in the period - T1 | No  | 26292                                                                           | 2059 | 28351 |
|                                                                                 | Yes | 3541                                                                            | 799  | 4340  |
| Total                                                                           |     | 29833                                                                           | 2858 | 32691 |

### Chi-Square Tests

|                  | Value | Exact Sig. (2-sided) |
|------------------|-------|----------------------|
| McNemar Test     |       | ,000 <sup>a</sup>    |
| N of Valid Cases | 32691 |                      |

a. Binomial distribution used.

CROSSTABS

```

/TABLES=AbHRel_T1 BY AbHRel_T2
/FORMAT=AVALUE TABLES
/STATISTICS=MCNEMAR
/CELLS=COUNT
/COUNT ROUND CELL.

```

### Crosstabs



**Case Processing Summary**

|                                                                                                                                                       | Valid |         | Cases Missing |         | Total |         |
|-------------------------------------------------------------------------------------------------------------------------------------------------------|-------|---------|---------------|---------|-------|---------|
|                                                                                                                                                       | N     | Percent | N             | Percent | N     | Percent |
| Any work absence due to HEALTH-RELATED CAUSES occurred in the period - T1 * Any work absence due to HEALTH-RELATED CAUSES occurred in the period - T2 | 32691 | 100,0%  | 0             | 0,0%    | 32691 | 100,0%  |

**Any work absence due to HEALTH-RELATED CAUSES occurred in the period - T1  
 \* Any work absence due to HEALTH-RELATED CAUSES occurred in the period -  
 T2 Crosstabulation**

Count

|                                                                           |     | Any work absence due to HEALTH-RELATED CAUSES occurred in the period - T2 |      | Total |
|---------------------------------------------------------------------------|-----|---------------------------------------------------------------------------|------|-------|
|                                                                           |     | No                                                                        | Yes  |       |
| Any work absence due to HEALTH-RELATED CAUSES occurred in the period - T1 | No  | 14695                                                                     | 4732 | 19427 |
|                                                                           | Yes | 6847                                                                      | 6417 | 13264 |

|       |       |       |       |
|-------|-------|-------|-------|
| Total | 21542 | 11149 | 32691 |
|-------|-------|-------|-------|

**Chi-Square Tests**

|                  | Value | Exact Sig. (2-sided) |
|------------------|-------|----------------------|
| McNemar Test     |       | ,000 <sup>a</sup>    |
| N of Valid Cases | 32691 |                      |

a. Binomial distribution used.

```

CROSSTABS
  /TABLES=AbFam_T1 BY AbFam_T2
  /FORMAT=AVALUE TABLES
  /STATISTICS=MCNEMAR
  /CELLS=COUNT
  /COUNT ROUND CELL.
    
```

**Crosstabs**

**Case Processing Summary**

|       |         |       |
|-------|---------|-------|
|       | Cases   |       |
| Valid | Missing | Total |

|                                                                                                                                                           | N     | Percent | N | Percent | N     | Percent |
|-----------------------------------------------------------------------------------------------------------------------------------------------------------|-------|---------|---|---------|-------|---------|
| Any work absence due to FAMILY member's illness or death in the period - T1 * Any work absence due to FAMILY member's illness or death in the period - T2 | 32691 | 100,0%  | 0 | 0,0%    | 32691 | 100,0%  |

**Any work absence due to FAMILY member's illness or death in the period - T1 \*  
Any work absence due to FAMILY member's illness or death in the period - T2  
Crosstabulation**

Count

|                                                                             |     | Any work absence due to FAMILY member's illness or death in the period - T2 |     | Total |
|-----------------------------------------------------------------------------|-----|-----------------------------------------------------------------------------|-----|-------|
|                                                                             |     | No                                                                          | Yes |       |
| Any work absence due to FAMILY member's illness or death in the period - T1 | No  | 31037                                                                       | 743 | 31780 |
|                                                                             | Yes | 868                                                                         | 43  | 911   |
| Total                                                                       |     | 31905                                                                       | 786 | 32691 |

**Chi-Square Tests**

|              | Value | Exact Sig. (2-sided) |
|--------------|-------|----------------------|
| McNemar Test |       | ,002 <sup>a</sup>    |

|                  |       |
|------------------|-------|
| N of Valid Cases | 32691 |
|------------------|-------|

a. Binomial distribution used.

CROSSTABS

```

/TABLES=AbBLD_T1 BY AbBLD_T2
/FORMAT=AVALUE TABLES
/STATISTICS=MCNEMAR
/CELLS=COUNT
/COUNT ROUND CELL.

```

## Crosstabs

### Case Processing Summary

|                                                                                                                                         | Valid |         | Cases<br>Missing |         | Total |         |
|-----------------------------------------------------------------------------------------------------------------------------------------|-------|---------|------------------|---------|-------|---------|
|                                                                                                                                         | N     | Percent | N                | Percent | N     | Percent |
| Any work absence due to BLOOD DONATION occurred in the period - T1 * Any work absence due to BLOOD DONATION occurred in the period - T2 | 32691 | 100,0%  | 0                | 0,0%    | 32691 | 100,0%  |

**Any work absence due to BLOOD DONATION occurred in the period - T1 \* Any work absence due to BLOOD DONATION occurred in the period - T2**  
**Crosstabulation**

Count

|                                                                    |     | Any work absence due to BLOOD DONATION occurred in the period - T2 |     | Total |
|--------------------------------------------------------------------|-----|--------------------------------------------------------------------|-----|-------|
|                                                                    |     | No                                                                 | Yes |       |
| Any work absence due to BLOOD DONATION occurred in the period - T1 | No  | 31567                                                              | 386 | 31953 |
|                                                                    | Yes | 609                                                                | 129 | 738   |
| Total                                                              |     | 32176                                                              | 515 | 32691 |

**Chi-Square Tests**

|                  | Value | Exact Sig. (2-sided) |
|------------------|-------|----------------------|
| McNemar Test     |       | ,000 <sup>a</sup>    |
| N of Valid Cases | 32691 |                      |

a. Binomial distribution used.

CROSSTABS

```

/TABLES=AbWMPA_T1 BY AbWMPA_T2
/FORMAT=AVALUE TABLES
/STATISTICS=MCNEMAR
/CELLS=COUNT
/COUNT ROUND CELL.
    
```

**Crosstabs**

**Case Processing Summary**

|                                                                                                                                                                                           | Valid |         | Cases Missing |         | Total |         |
|-------------------------------------------------------------------------------------------------------------------------------------------------------------------------------------------|-------|---------|---------------|---------|-------|---------|
|                                                                                                                                                                                           | N     | Percent | N             | Percent | N     | Percent |
| Any work absence due to wedding, maternity, paternity or adoption leaves in the period - T1 * Any work absence due to wedding, maternity, paternity or adoption leaves in the period - T1 | 32691 | 100,0%  | 0             | 0,0%    | 32691 | 100,0%  |

**Any work absence due to wedding, maternity, paternity or adoption leaves in the period - T1 \* Any work absence due to wedding, maternity, paternity or adoption leaves in the period - T1 Crosstabulation**

Count

Supporting Information. Data Analysis. Part 1.

|                                                                                                   |     | Any work absence due to wedding,<br>maternity, paternity or adoption leaves in<br>the period - T1 |      | Total |
|---------------------------------------------------------------------------------------------------|-----|---------------------------------------------------------------------------------------------------|------|-------|
|                                                                                                   |     | No                                                                                                | Yes  |       |
| Any work absence due to wedding,<br>maternity, paternity or adoption<br>leaves in the period - T1 | No  | 29902                                                                                             | 1316 | 31218 |
|                                                                                                   | Yes | 1441                                                                                              | 32   | 1473  |
| Total                                                                                             |     | 31343                                                                                             | 1348 | 32691 |

### Chi-Square Tests

|                  | Value | Exact Sig. (2-sided) |
|------------------|-------|----------------------|
| McNemar Test     |       | ,018 <sup>a</sup>    |
| N of Valid Cases | 32691 |                      |

a. Binomial distribution used.

CROSSTABS

```

/TABLES=AbAcd_T1 BY AbAcd_T2
/FORMAT=AVALUE TABLES
/STATISTICS=MCNEMAR
/CELLS=COUNT
/COUNT ROUND CELL.

```

### Crosstabs

**Case Processing Summary**

|                                                                                                                                                         | Valid |         | Cases Missing |         | Total |         |
|---------------------------------------------------------------------------------------------------------------------------------------------------------|-------|---------|---------------|---------|-------|---------|
|                                                                                                                                                         | N     | Percent | N             | Percent | N     | Percent |
| Any work absence due to OCCUPATIONAL ACCIDENTS occurred in the period - T1 * Any work absence due to OCCUPATIONAL ACCIDENTS occurred in the period - T2 | 32691 | 100,0%  | 0             | 0,0%    | 32691 | 100,0%  |

**Any work absence due to OCCUPATIONAL ACCIDENTS occurred in the period - T1 \* Any work absence due to OCCUPATIONAL ACCIDENTS occurred in the period - T2 Crosstabulation**

Count

|                         |    | Any work absence due to OCCUPATIONAL ACCIDENTS occurred in the period - T2 |     | Total |
|-------------------------|----|----------------------------------------------------------------------------|-----|-------|
|                         |    | No                                                                         | Yes |       |
| Any work absence due to | No | 32557                                                                      | 46  | 32603 |



Supporting Information. Data Analysis. Part 1.

|                                                       |     |       |    |       |
|-------------------------------------------------------|-----|-------|----|-------|
| OCCUPATIONAL ACCIDENTS<br>occurred in the period - T1 | Yes | 88    | 0  | 88    |
| Total                                                 |     | 32645 | 46 | 32691 |

### Chi-Square Tests

|                  | Value | Exact Sig. (2-sided) |
|------------------|-------|----------------------|
| McNemar Test     |       | ,000 <sup>a</sup>    |
| N of Valid Cases | 32691 |                      |

a. Binomial distribution used.

```
DATASET ACTIVATE DataSet2.
```

```
GET
```

```
FILE='C:\Users\trabalho\Documents\COVID-19\Centro Pesquisa HUB COVID19\BDForceII_KM_ALLCause.sav'.
```

```
DATASET NAME DataSet3 WINDOW=FRONT.
```

```
DATASET ACTIVATE DataSet3.
```

```
SAVE OUTFILE='C:\Users\trabalho\Documents\COVID-19\Centro Pesquisa HUB '+
'COVID19\BDForceII_KM_ALLCause.sav'
/COMPRESSED.
```

```
KM TTE BY AssgnGrp
```

```
/STATUS=AbsEvent(1)
```

```
/PRINT MEAN
```

```
/PLOT SURVIVAL HAZARD LOGSURV
```

```
/TEST LOGRANK BRESLOW TARONE
```

```
/COMPARE OVERALL POOLED
```

```
/SAVE SURVIVAL CUMEVENT.
```

Indirect assessment of the uniformity (steadiness) of the occurrence of work absences



|                    |         |      |         |         |         |   |   |   |
|--------------------|---------|------|---------|---------|---------|---|---|---|
| Non-Exposed (2019) | 103,785 | ,309 | 103,179 | 104,391 | 145,000 | . | . | . |
| Exposed (2020)     | 110,510 | ,313 | 109,896 | 111,123 | .       | . | . | . |
| Overall            | 107,147 | ,220 | 106,716 | 107,579 | .       | . | . | . |

a. Estimation is limited to the largest survival time if it is censored.

### Overall Comparisons

|                                | Chi-Square | df | Sig. |
|--------------------------------|------------|----|------|
| Log Rank (Mantel-Cox)          | 336,910    | 1  | ,000 |
| Breslow (Generalized Wilcoxon) | 246,353    | 1  | ,000 |
| Tarone-Ware                    | 294,469    | 1  | ,000 |

Test of equality of survival distributions for the different levels of Exposure status as to the pandemic environment.

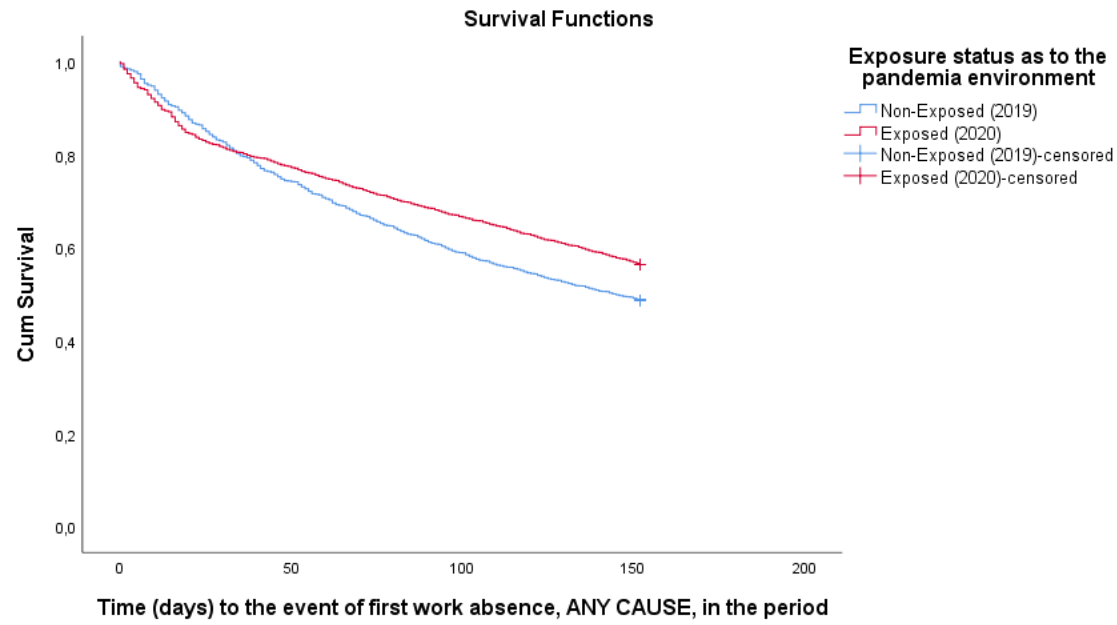

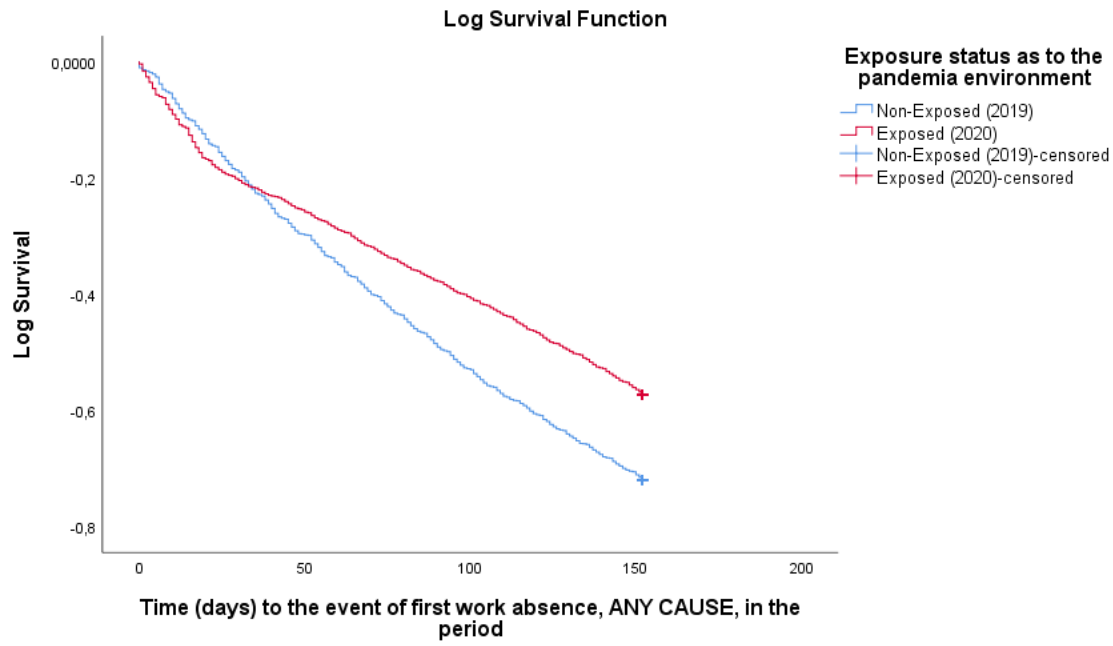

Supporting Information. Data Analysis. Part 1.

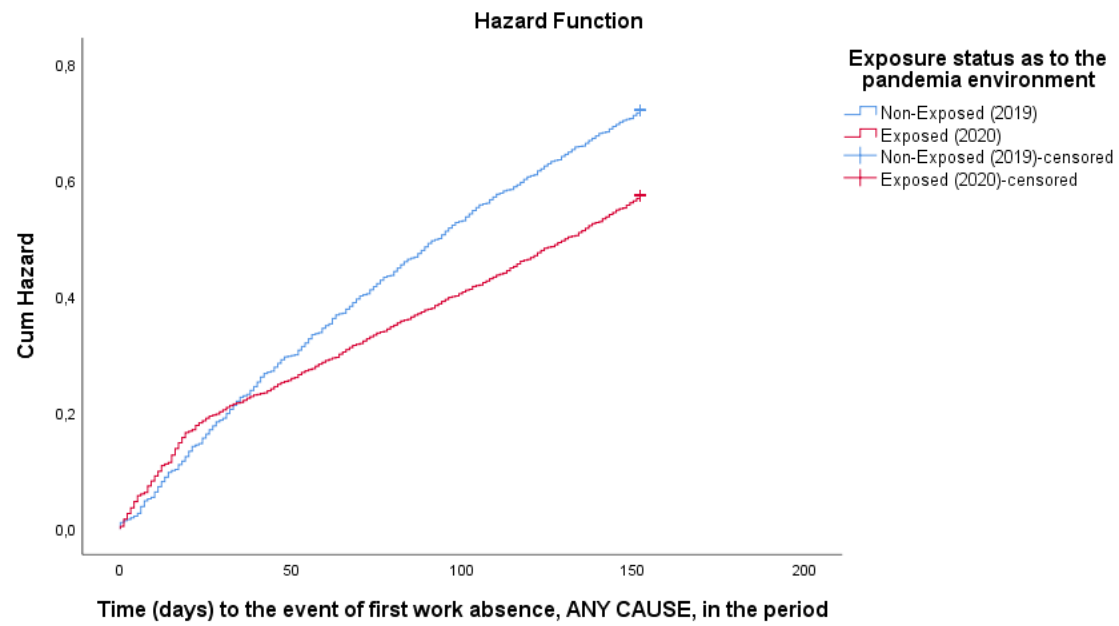

```

KM TTE BY AssgnGrp
/STATUS=AbsEvent(1)
/PRINT MEAN
/PLOT SURVIVAL HAZARD LOGSURV
/TEST LOGRANK BRESLOW TARONE
/COMPARE OVERALL POOLED.

```

## Kaplan-Meier

### Case Processing Summary

| Exposure status as to the<br>pandemia environment | Total N | N of Events | Censored |         |
|---------------------------------------------------|---------|-------------|----------|---------|
|                                                   |         |             | N        | Percent |
| Non-Exposed (2019)                                | 32691   | 13343       | 19348    | 59,2%   |
| Exposed (2020)                                    | 32691   | 11234       | 21457    | 65,6%   |
| Overall                                           | 65382   | 24577       | 40805    | 62,4%   |

### Means and Medians for Survival Time

| Exposure status as to the<br>pandemia environment | Mean <sup>a</sup> |            |                         |             | Median   |            |                         |             |
|---------------------------------------------------|-------------------|------------|-------------------------|-------------|----------|------------|-------------------------|-------------|
|                                                   | Estimate          | Std. Error | 95% Confidence Interval |             | Estimate | Std. Error | 95% Confidence Interval |             |
|                                                   |                   |            | Lower Bound             | Upper Bound |          |            | Lower Bound             | Upper Bound |
| Non-Exposed (2019)                                | 115,140           | ,289       | 114,574                 | 115,705     | .        | .          | .                       | .           |
| Exposed (2020)                                    | 118,660           | ,296       | 118,080                 | 119,240     | .        | .          | .                       | .           |
| Overall                                           | 116,900           | ,207       | 116,494                 | 117,305     | .        | .          | .                       | .           |

a. Estimation is limited to the largest survival time if it is censored.

### Overall Comparisons

| Chi-Square | df | Sig. |
|------------|----|------|
|------------|----|------|

|                                |         |   |      |
|--------------------------------|---------|---|------|
| Log Rank (Mantel-Cox)          | 220,825 | 1 | ,000 |
| Breslow (Generalized Wilcoxon) | 146,360 | 1 | ,000 |
| Tarone-Ware                    | 183,244 | 1 | ,000 |

Test of equality of survival distributions for the different levels of Exposure status as to the pandemia environment.

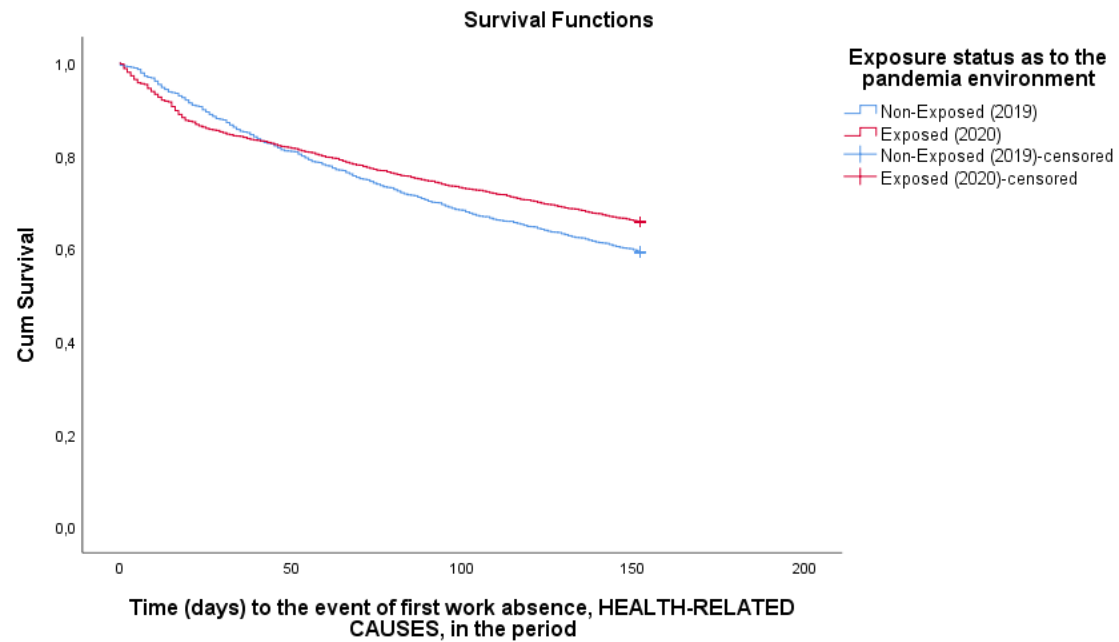



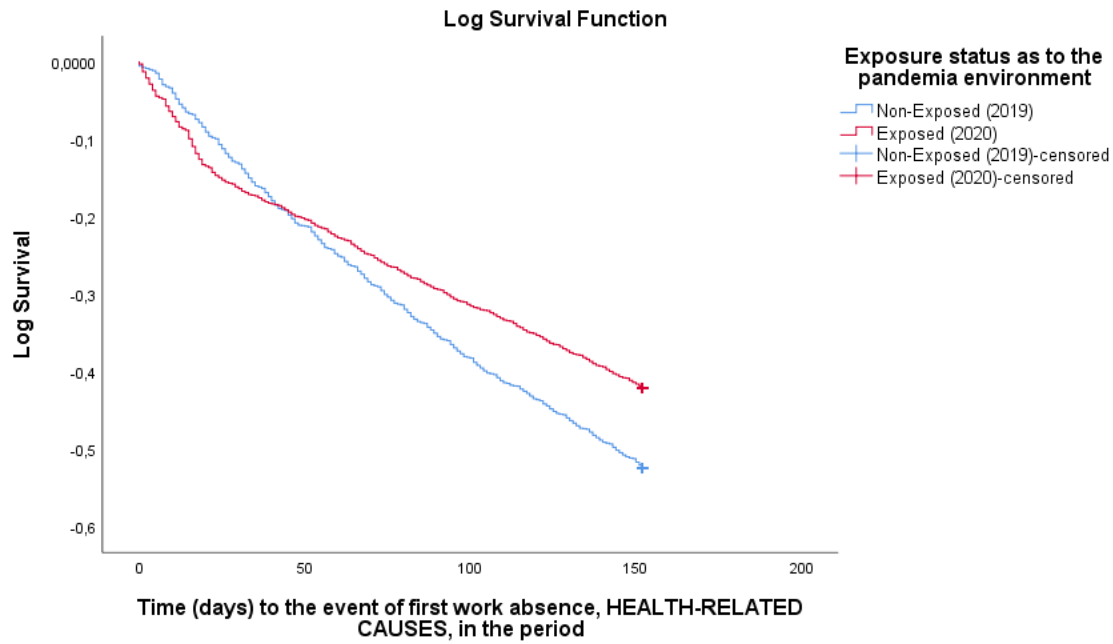

Supporting Information. Data Analysis. Part 1.

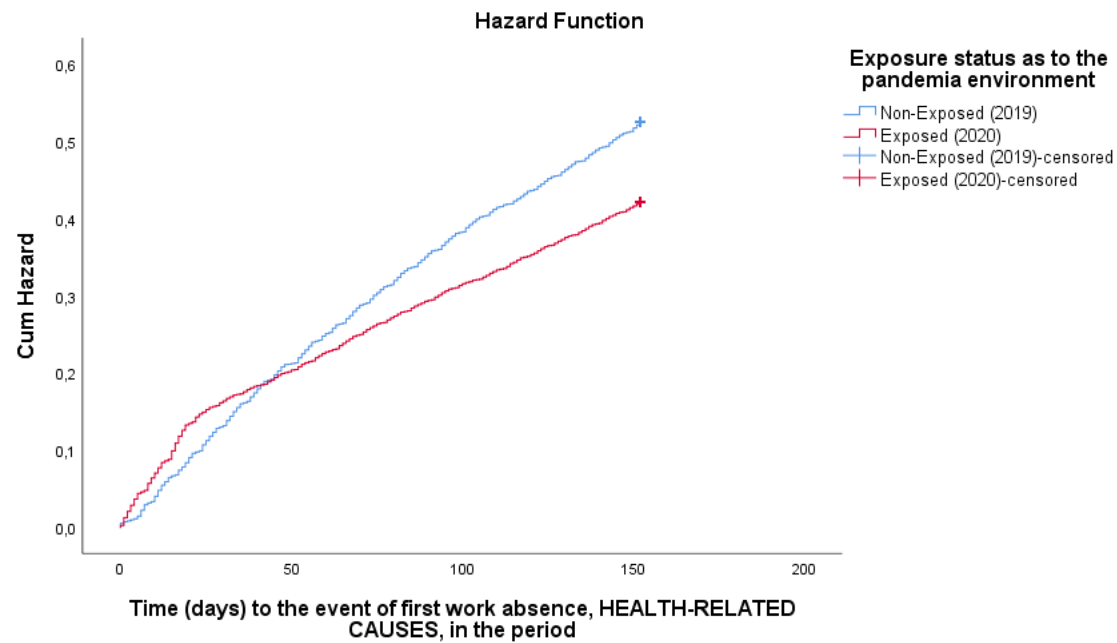

\* Custom Tables.

CTABLES

```
/VLABELS VARIABLES=DisGroup AsgnGrp DISPLAY=DEFAULT
```

```
/TABLE DisGroup [C][COUNT F40.0, COLPCT.COUNT PCT40.1] BY AsgnGrp [C]
```

```
/CATEGORIES VARIABLES=DisGroup ORDER=A KEY=VALUE EMPTY=INCLUDE TOTAL=YES POSITION=AFTER
```

```
/CATEGORIES VARIABLES=AsgnGrp ORDER=A KEY=VALUE EMPTY=INCLUDE
```

```
/CRITERIA CILEVEL=95.
```

Assessment of the occurrence and relative distribution of specific groups of diseases as underlying causes of work absences between exposed and non-exposed subjects

## Custom Tables

|                            |                                            | Assignment group   |            |                |            |
|----------------------------|--------------------------------------------|--------------------|------------|----------------|------------|
|                            |                                            | Non-exposed (2019) |            | Exposed (2020) |            |
|                            |                                            | Count              | Column N % | Count          | Column N % |
| General groups of diseases | Infectious                                 | 2507               | 12,1%      | 1364           | 8,9%       |
|                            | Neoplasms                                  | 198                | 1,0%       | 134            | 0,9%       |
|                            | Immunodeficiencies and blood<br>discrasias | 23                 | 0,1%       | 22             | 0,1%       |
|                            | Endocrine, metabolic and nutritional       | 108                | 0,5%       | 102            | 0,7%       |
|                            | Mental and behavioral                      | 1239               | 6,0%       | 1657           | 10,8%      |
|                            | Neurological                               | 935                | 4,5%       | 833            | 5,4%       |
|                            | Ophtalmological                            | 778                | 3,8%       | 459            | 3,0%       |
|                            | Ear and mastoid                            | 211                | 1,0%       | 223            | 1,4%       |
|                            | Cardiovascular                             | 479                | 2,3%       | 415            | 2,7%       |
|                            | Upper and lower respiratory                | 3732               | 18,1%      | 2374           | 15,4%      |
|                            | Digestive system                           | 2180               | 10,6%      | 1445           | 9,4%       |
|                            | Skin and subcutaneous                      | 289                | 1,4%       | 256            | 1,7%       |

|                                            |       |        |       |        |
|--------------------------------------------|-------|--------|-------|--------|
| Musculoskeletal and rheumatic              | 2754  | 13,3%  | 2288  | 14,9%  |
| Genitourinary                              | 1040  | 5,0%   | 786   | 5,1%   |
| Pregnancy, childbirth and puerperium       | 1264  | 6,1%   | 647   | 4,2%   |
| Other diseases, symptoms and labs findings | 393   | 1,9%   | 326   | 2,1%   |
| Trauma and external causes                 | 1061  | 5,1%   | 831   | 5,4%   |
| Exams, procedures and convalescence        | 1415  | 6,9%   | 1188  | 7,7%   |
| Allergy and related disorders              | 46    | 0,2%   | 45    | 0,3%   |
| Total                                      | 20652 | 100,0% | 15395 | 100,0% |

```
DATASET ACTIVATE DataSet11.
```

```
* Chart Builder.
```

```
GGRAPH
```

```
  /GRAPHDATASET NAME="graphdataset" VARIABLES=DisGroup COUNT([name="COUNT"] AsgnGrp
```

```
    MISSING=LISTWISE REPORTMISSING=NO
```

```
  /GRAPHSPEC SOURCE=INLINE.
```

```
BEGIN GPL
```

```
  SOURCE: s=userSource(id("graphdataset"))
```

```
  DATA: DisGroup=col(source(s), name("DisGroup"), unit.category())
```

```
  DATA: COUNT=col(source(s), name("COUNT"))
```

```
  DATA: AsgnGrp=col(source(s), name("AsgnGrp"), unit.category())
```

```
  COORD: rect(dim(1,2), cluster(3,0))
```

```
  GUIDE: axis(dim(3), label("General groups of diseases"))
```

```
  GUIDE: axis(dim(2), label("Count"))
```

```
  GUIDE: legend(aesthetic(aesthetic.color.interior), label("Assignment group"))
```

```
  GUIDE: text.title(label("Clustered Bar Count of General groups of diseases by Assignment group"))
```

```
  SCALE: cat(dim(3), include("1", "2", "3", "4", "5", "6", "7", "8", "9", "10", "11", "12"
```

```
, "13", "14", "15", "16", "17", "18", "19"))
```

```
  SCALE: linear(dim(2), include(0))
```

Supporting Information. Data Analysis. Part 1.

```
SCALE: cat(aesthetic(aesthetic.color.interior), include("0", "1"))
SCALE: cat(dim(1), include("0", "1"))
ELEMENT: interval(position(AsgnGrp*COUNT*DisGroup), color.interior(AsgnGrp),
  shape.interior(shape.square))
END GPL.
```

Supporting Information. Continues in the next file.
