# Supplementary material for: Impact of COVID-19 on the mental health of public university hospital workers in Brazil: A cohort-based analysis of 32,691 workers
Source: PubMed Central journal article supplement (PMC9202958; doi:10.1371/journal.pone.0269318), 2022-06-16
Supplement: pone.0269318.s002.pdf [file pone.0269318.s002.pdf]

## GGraph

[DataSet11] C:\Users\trabalho\Documents\COVID-19\Centro Pesquisa HUB COVID19\BDForceII\_OnlyEvents\_ICDCompst\_04102020.sav

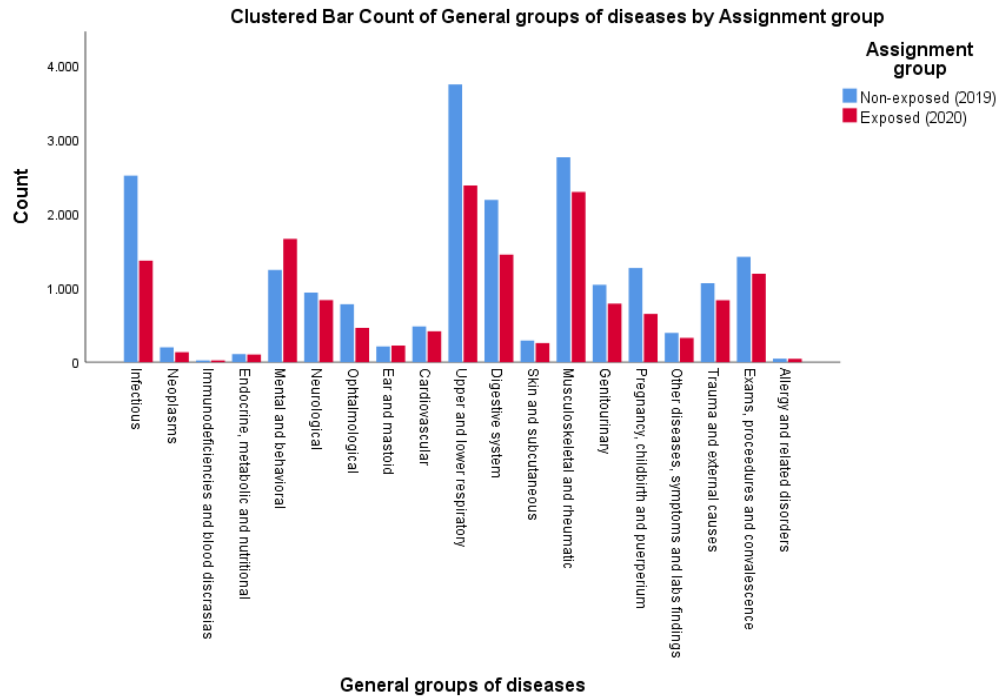

\* Chart Builder.

Supporting Information. Data Analysis. Part2

```
GGRAPH
  /GRAPHDATASET NAME="graphdataset" VARIABLES=DisGroup COUNT([name="COUNT"]) AsgnGrp
  MISSING=LISTWISE REPORTMISSING=NO
  /GRAPHSPEC SOURCE=INLINE.
BEGIN GPL
  SOURCE: s=userSource(id("graphdataset"))
  DATA: DisGroup=col(source(s), name("DisGroup"), unit.category())
  DATA: COUNT=col(source(s), name("COUNT"))
  DATA: AsgnGrp=col(source(s), name("AsgnGrp"), unit.category())
  COORD: rect(dim(1,2), cluster(3,0))
  GUIDE: axis(dim(3), label("General groups of diseases"))
  GUIDE: axis(dim(2), label("Percent"))
  GUIDE: legend(aesthetic(aesthetic.color.interior), label("Assignment group"))
  GUIDE: text.title(label("Clustered Bar Percent of General groups of diseases by Assignment ",
    "group"))
  SCALE: cat(dim(3), include("1", "2", "3", "4", "5", "6", "7", "8", "9", "10", "11", "12"
, "13", "14", "15", "16", "17", "18", "19"))
  SCALE: linear(dim(2), include(0))
  SCALE: cat(aesthetic(aesthetic.color.interior), include("0", "1"))
  SCALE: cat(dim(1), include("0", "1"))
  ELEMENT: interval(position(summary.percent(AsgnGrp*COUNT*DisGroup,
    base.aesthetic(aesthetic(aesthetic.color.interior)))), color.interior(AsgnGrp),
    shape.interior(shape.square))
END GPL.
```

## GGraph

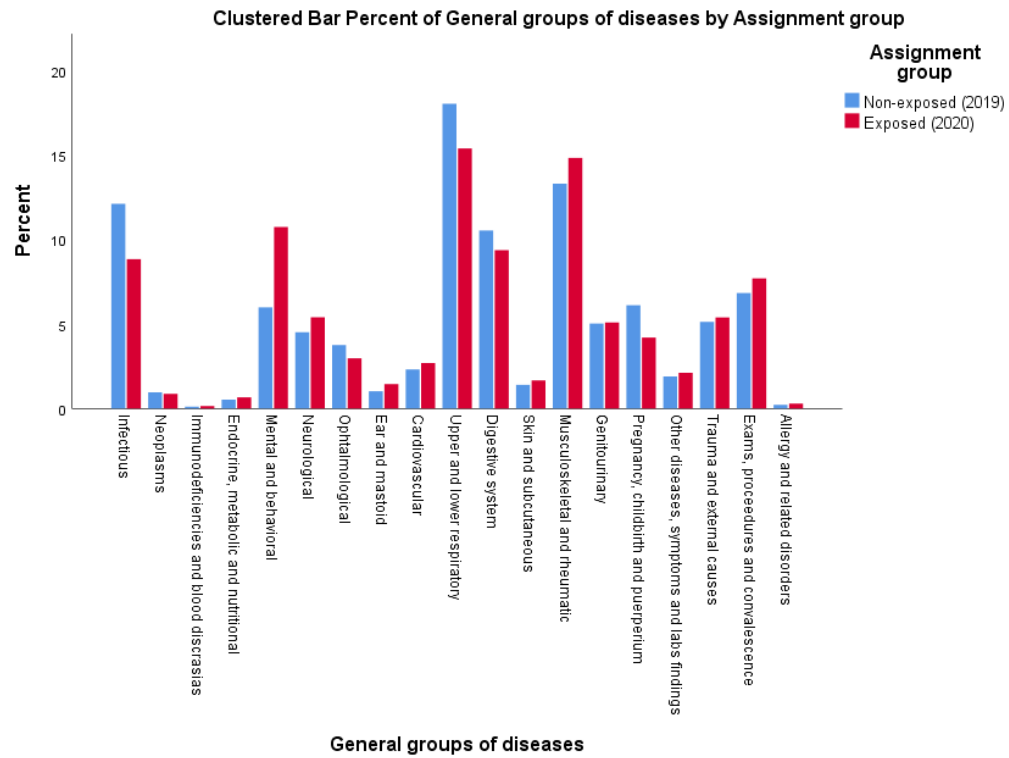

Assessment of the differences in work absences due to Mental Disease between exposed and non-exposed individuals

```

DATASET ACTIVATE DataSet1.
DATASET CLOSE DataSet11.
DATASET ACTIVATE DataSet1.
DATASET CLOSE DataSet10.

```

## Supporting Information. Data Analysis. Part2

```

DATASET ACTIVATE DataSet2.
CROSSTABS
  /TABLES=AsgnGrp BY AbMnt
  /FORMAT=AVALUE TABLES
  /STATISTICS=RISK
  /CELLS=COUNT ROW TOTAL
  /COUNT ROUND CELL.

```

**Crosstabs**

[DataSet2] C:\Users\trabalho\Documents\COVID-19\Centro Pesquisa HUB COVID19\BDForceII\_AbsperInd\_Vertic.sav

**Case Processing Summary**

|                                                                                                      | Valid |         | Cases Missing |         | Total |         |
|------------------------------------------------------------------------------------------------------|-------|---------|---------------|---------|-------|---------|
|                                                                                                      | N     | Percent | N             | Percent | N     | Percent |
| Exposure to the pandemia environment * Any work absence due to MENTAL DISEASE occurred in the period | 65382 | 100,0%  | 0             | 0,0%    | 65382 | 100,0%  |

**Exposure to the pandemia environment \* Any work absence due to MENTAL DISEASE occurred in the period Crosstabulation**

|                                      |                                               |                                               | Any work absence due to MENTAL DISEASE occurred in the period |        | Total  |
|--------------------------------------|-----------------------------------------------|-----------------------------------------------|---------------------------------------------------------------|--------|--------|
|                                      |                                               |                                               | No                                                            | Yes    |        |
| Exposure to the pandemia environment | Non-Exposed (2019)                            | Count                                         | 31875                                                         | 816    | 32691  |
|                                      |                                               | % within Exposure to the pandemia environment | 97,5%                                                         | 2,5%   | 100,0% |
|                                      |                                               | % of Total                                    | 48,8%                                                         | 1,2%   | 50,0%  |
|                                      | Exposed (2020)                                | Count                                         | 31571                                                         | 1120   | 32691  |
|                                      |                                               | % within Exposure to the pandemia environment | 96,6%                                                         | 3,4%   | 100,0% |
|                                      |                                               | % of Total                                    | 48,3%                                                         | 1,7%   | 50,0%  |
| Total                                | Count                                         | 63446                                         | 1936                                                          | 65382  |        |
|                                      | % within Exposure to the pandemia environment | 97,0%                                         | 3,0%                                                          | 100,0% |        |
|                                      | % of Total                                    | 97,0%                                         | 3,0%                                                          | 100,0% |        |

**Risk Estimate**

|                                                                                           | Value | 95% Confidence Interval |       |
|-------------------------------------------------------------------------------------------|-------|-------------------------|-------|
|                                                                                           |       | Lower                   | Upper |
| Odds Ratio for Exposure to the pandemia environment (Non-Exposed (2019) / Exposed (2020)) | 1,386 | 1,265                   | 1,519 |

## Supporting Information. Data Analysis. Part2

|                                                                                |              |       |       |
|--------------------------------------------------------------------------------|--------------|-------|-------|
| For cohort Any work absence due to MENTAL DISEASE occurred in the period = No  | 1,010        | 1,007 | 1,012 |
| For cohort Any work absence due to MENTAL DISEASE occurred in the period = Yes | ,729         | ,667  | ,796  |
| <b>N of Valid Cases</b>                                                        | <b>65382</b> |       |       |

```

DATASET ACTIVATE DataSet2.
DATASET CLOSE DataSet1.
DATASET ACTIVATE DataSet5.
DATASET CLOSE DataSet2.

```

```

GET
  FILE='C:\Users\trabalho\Documents\COVID-19\Centro Pesquisa HUB COVID19\BDForceII_AbsperInd_Horiz.sav'.
DATASET NAME DataSet2 WINDOW=FRONT.
CROSSTABS
  /TABLES=AbMnt_T1 BY AbMnt_T2
  /FORMAT=AVALUE TABLES
  /STATISTICS=MCNEMAR
  /CELLS=COUNT
  /COUNT ROUND CELL.

```

## Crosstabs

[DataSet2] C:\Users\trabalho\Documents\COVID-19\Centro Pesquisa HUB COVID19\BDForceII\_AbsperInd\_Horiz.sav

**Case Processing Summary**

|                                                                                                                                         | Valid |         | Cases Missing |         | Total |         |
|-----------------------------------------------------------------------------------------------------------------------------------------|-------|---------|---------------|---------|-------|---------|
|                                                                                                                                         | N     | Percent | N             | Percent | N     | Percent |
| Any work absence due to MENTAL DISEASE occurred in the period - T1 * Any work absence due to MENTAL DISEASE occurred in the period - T2 | 32691 | 100,0%  | 0             | 0,0%    | 32691 | 100,0%  |

**Any work absence due to MENTAL DISEASE occurred in the period - T1 \* Any work absence due to MENTAL DISEASE occurred in the period - T2**

**Crosstabulation**

| Count                          |    | Any work absence due to MENTAL DISEASE occurred in the period - T2 |     | Total |
|--------------------------------|----|--------------------------------------------------------------------|-----|-------|
|                                |    | No                                                                 | Yes |       |
| Any work absence due to MENTAL | No | 30939                                                              | 936 | 31875 |

|                                            |       |      |       |
|--------------------------------------------|-------|------|-------|
| DISEASE occurred in the period - Yes<br>T1 | 632   | 184  | 816   |
| Total                                      | 31571 | 1120 | 32691 |

### Chi-Square Tests

|                  | Value | Exact Sig. (2-sided) |
|------------------|-------|----------------------|
| McNemar Test     |       | ,000 <sup>a</sup>    |
| N of Valid Cases | 32691 |                      |

a. Binomial distribution used.

```

DATASET ACTIVATE DataSet1.
EXAMINE VARIABLES=AbMnt_N BY AsgnGrp
  /PLOT HISTOGRAM NPLOT
  /PERCENTILES(5,10,25,50,75,90,95) HAVERAGE
  /STATISTICS DESCRIPTIVES
  /CINTERVAL 95
  /MISSING LISTWISE
  /NOTOTAL.

```

### Explore: events of work absence per individual due to Mental Diseases (counts)

[DataSet1] C:\Users\trabalho\Documents\COVID-19\Centro Pesquisa HUB COVID19\BDForceII\_AbsperInd\_Vertic.sav



### Exposure to the pandemia environment

#### Case Processing Summary

|                                        | Exposure to the pandemia environment | Valid |         | Cases Missing |         | Total |         |
|----------------------------------------|--------------------------------------|-------|---------|---------------|---------|-------|---------|
|                                        |                                      | N     | Percent | N             | Percent | N     | Percent |
| Events of work absence due to          | Non-Exposed (2019)                   | 32691 | 100,0%  | 0             | 0,0%    | 32691 | 100,0%  |
| MENTAL DISEASE occurring in the period | Exposed (2020)                       | 32691 | 100,0%  | 0             | 0,0%    | 32691 | 100,0%  |

#### Descriptives

| Exposure to the pandemia environment   |                    | Statistic                        | Std. Error |
|----------------------------------------|--------------------|----------------------------------|------------|
| Events of work absence due to          | Non-Exposed (2019) | Mean                             | ,0379      |
| MENTAL DISEASE occurring in the period |                    | 95% Confidence Interval for Mean |            |
|                                        |                    | Lower Bound                      | ,0349      |
|                                        |                    | Upper Bound                      | ,0409      |
|                                        |                    | 5% Trimmed Mean                  | ,0000      |
|                                        |                    | Median                           | ,0000      |
|                                        |                    | Variance                         | ,0757      |
|                                        |                    | Std. Deviation                   | ,2752      |

|                |                                  |             |          |       |
|----------------|----------------------------------|-------------|----------|-------|
|                | Minimum                          |             | 0        |       |
|                | Maximum                          |             | 8        |       |
|                | Range                            |             | 8        |       |
|                | Interquartile Range              |             | 0        |       |
|                | Skewness                         |             | 10,0935  | ,0135 |
|                | Kurtosis                         |             | 137,0622 | ,0271 |
| Exposed (2020) | Mean                             |             | ,0508    | ,0017 |
|                | 95% Confidence Interval for Mean | Lower Bound | ,0475    |       |
|                |                                  | Upper Bound | ,0542    |       |
|                | 5% Trimmed Mean                  |             | ,0000    |       |
|                | Median                           |             | ,0000    |       |
|                | Variance                         |             | ,0971    |       |
|                | Std. Deviation                   |             | ,3117    |       |
|                | Minimum                          |             | 0        |       |
|                | Maximum                          |             | 7        |       |
|                | Range                            |             | 7        |       |
|                | Interquartile Range              |             | 0        |       |
|                | Skewness                         |             | 8,3336   | ,0135 |
|                | Kurtosis                         |             | 91,1899  | ,0271 |

**Tests of Normality**

|  | Exposure to the pandemia environment | Kolmogorov-Smirnov <sup>a</sup> |    |      |
|--|--------------------------------------|---------------------------------|----|------|
|  |                                      | Statistic                       | df | Sig. |
|  |                                      |                                 |    |      |

|                                 |                    |      |       |      |
|---------------------------------|--------------------|------|-------|------|
| Events of work absence due to   | Non-Exposed (2019) | ,530 | 32691 | ,000 |
| MENTAL DISEASE occurring in the | Exposed (2020)     | ,531 | 32691 | ,000 |
| period                          |                    |      |       |      |

a. Lilliefors Significance Correction

## Events of work absence due to MENTAL DISEASE occurring in the period

## Histograms

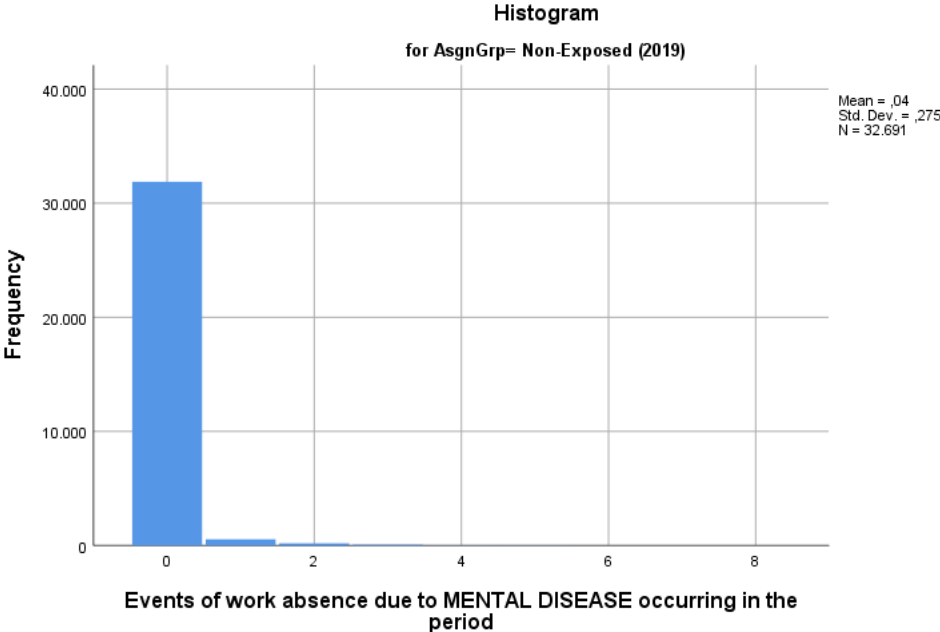

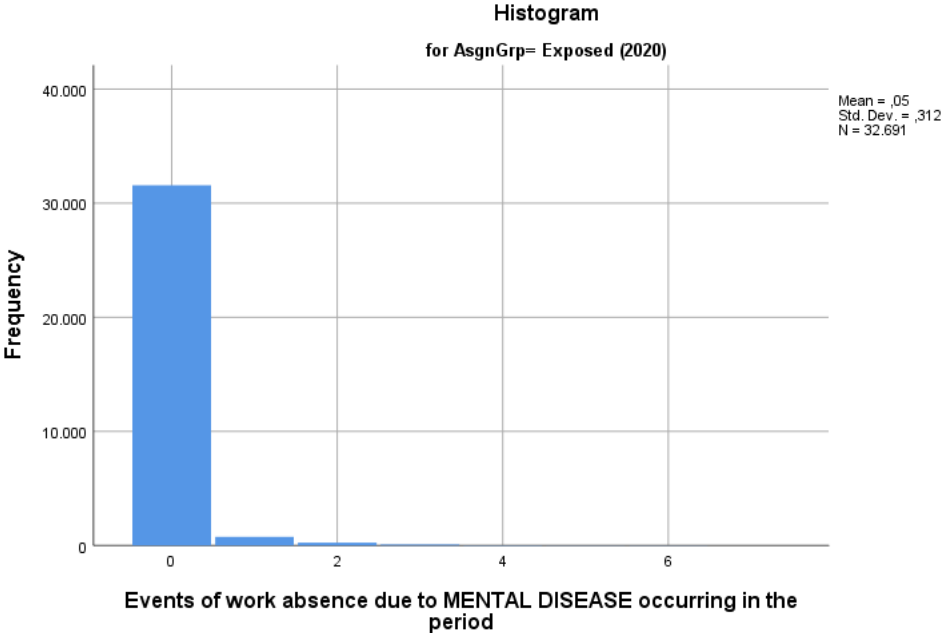

**Normal Q-Q Plots**

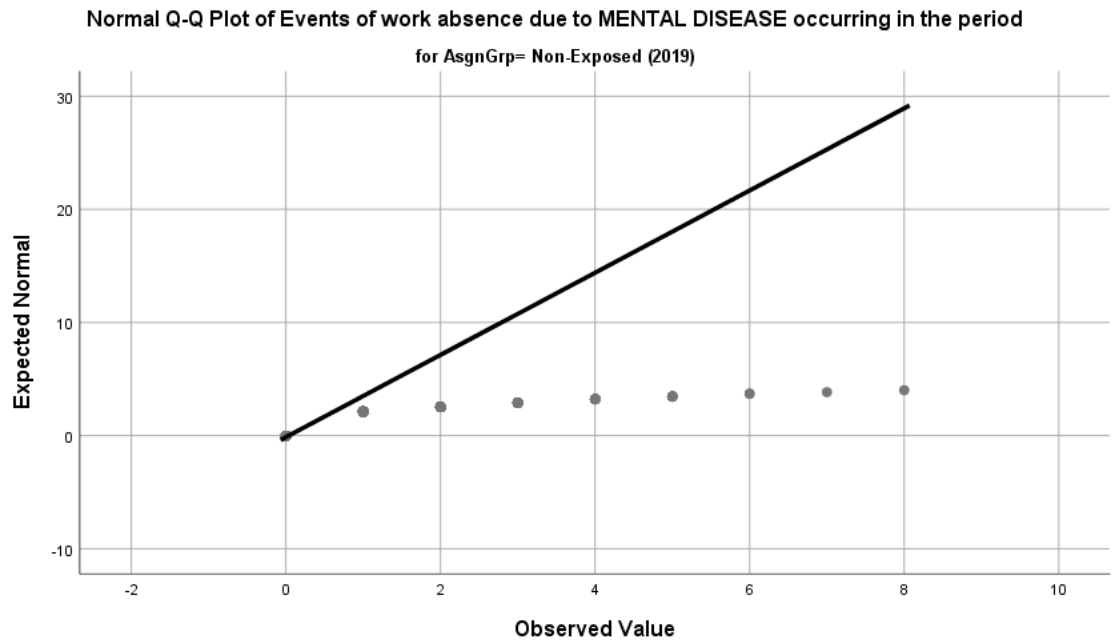

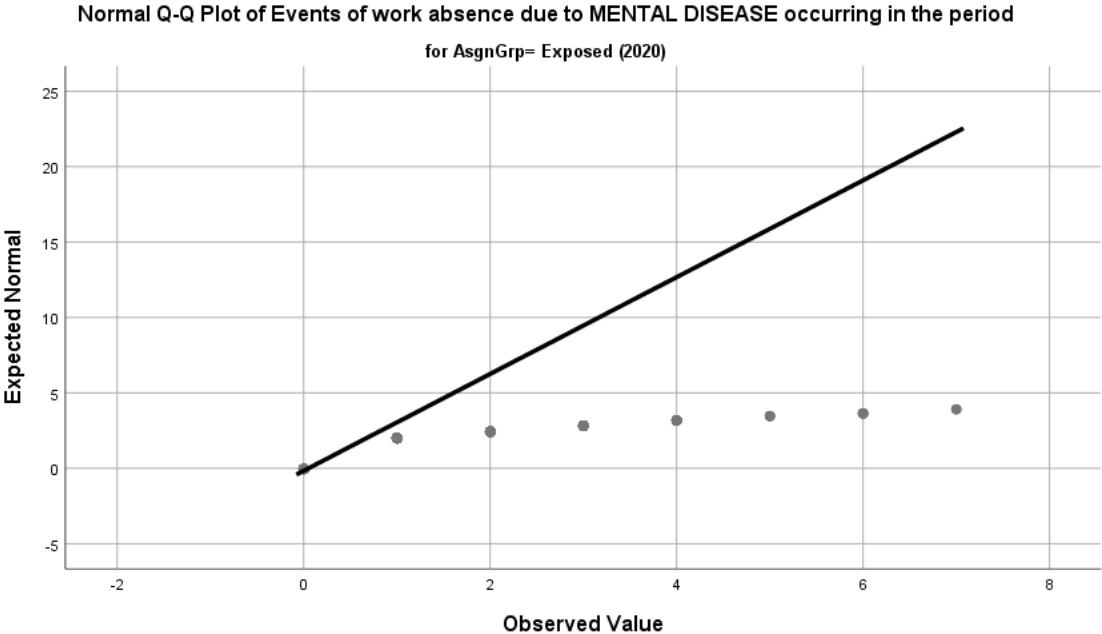

**Detrended Normal Q-Q Plots**

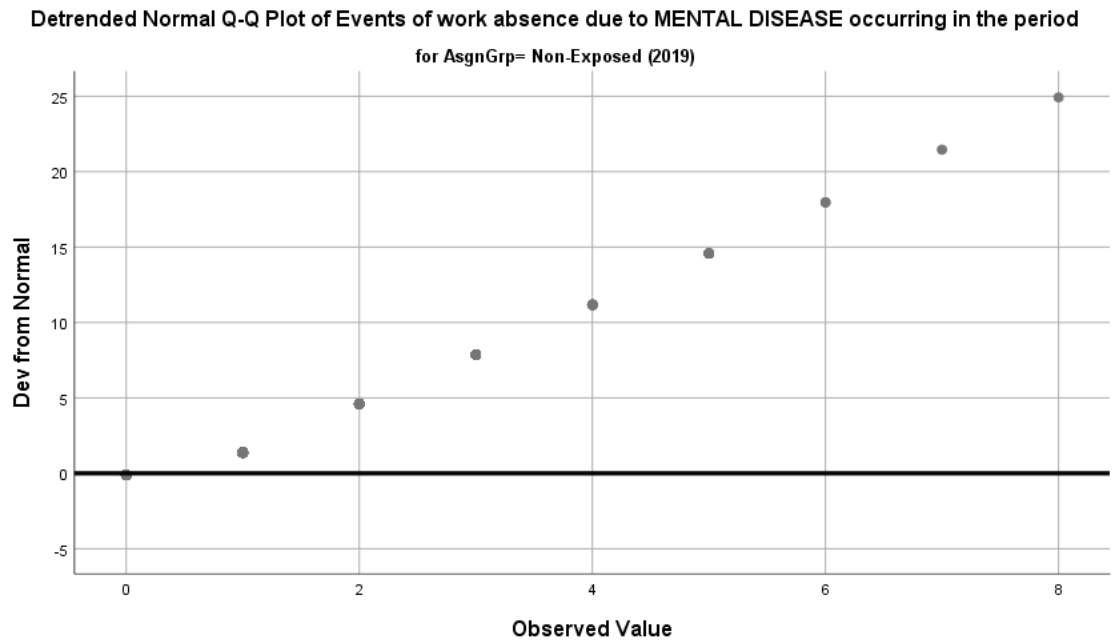



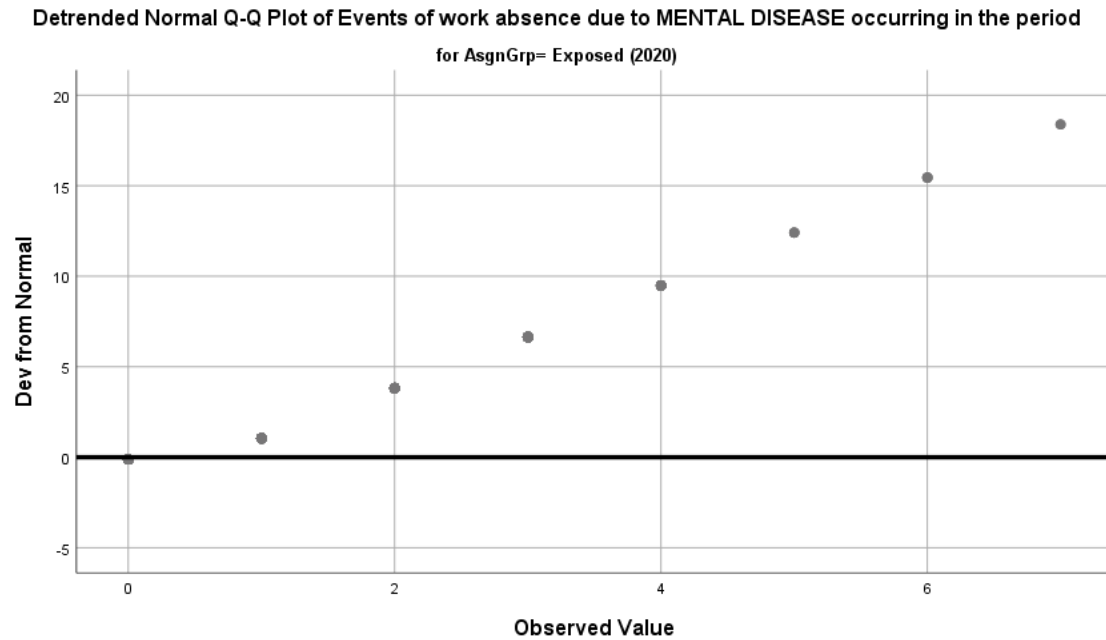

```
COMPUTE AbMnt_N100=AbMnt_N * 100.
EXECUTE.
```

**\* Generalized Estimating Equations.**

```
GENLIN AbMnt_N100 BY AsgnGrp Sex (ORDER=DESCENDING)
  /MODEL AsgnGrp Sex INTERCEPT=YES
  DISTRIBUTION=NEGBIN(MLE) LINK=LOG
  /CRITERIA METHOD=FISHER(1) SCALE=1 MAXITERATIONS=100 MAXSTEPHALVING=5 PCONVERGE=1E-006 (ABSOLUTE)
  SINGULAR=1E-012 ANALYSISTYPE=3 (WALD) CILEVEL=95 LIKELIHOOD=FULL
  /EMMEANS TABLES=AsgnGrp SCALE=ORIGINAL
  /EMMEANS TABLES=Sex SCALE=ORIGINAL
  /REPEATED SUBJECT=ID WITHINSUBJECT=AsgnGrp SORT=YES CORRTYPE=UNSTRUCTURED ADJUSTCORR=YES
  COVB=ROBUST MAXITERATIONS=100 PCONVERGE=1e-006 (ABSOLUTE) UPDATECORR=1
```

```

/MISSING CLASSMISSING=EXCLUDE
/PRINT CPS DESCRIPTIVES MODELINFO FIT SUMMARY SOLUTION (EXPONENTIATED) .

```

## Generalized Linear Models

### Model Information

|                                      |   |                                                                                            |
|--------------------------------------|---|--------------------------------------------------------------------------------------------|
| Dependent Variable                   |   | Events of work absence due to MENTAL DISEASE occurring in the period per 100 professionals |
| Probability Distribution             |   | Negative binomial (MLE)                                                                    |
| Link Function                        |   | Log                                                                                        |
| Subject Effect                       | 1 | ID                                                                                         |
| Within-Subject Effect                | 1 | Exposure to the pandemia environment                                                       |
| Working Correlation Matrix Structure |   | Unstructured                                                                               |

### Case Processing Summary

|          | N     | Percent |
|----------|-------|---------|
| Included | 65382 | 100,0%  |
| Excluded | 0     | 0,0%    |

|       |       |        |
|-------|-------|--------|
| Total | 65382 | 100,0% |
|-------|-------|--------|

**Correlated Data Summary**

|                                    |                       |                                      |       |
|------------------------------------|-----------------------|--------------------------------------|-------|
| Number of Levels                   | Subject Effect        | ID                                   | 32691 |
|                                    | Within-Subject Effect | Exposure to the pandemia environment | 2     |
| Number of Subjects                 |                       |                                      | 32691 |
| Number of Measurements per Subject | Minimum               |                                      | 2     |
|                                    | Maximum               |                                      | 2     |
| Correlation Matrix Dimension       |                       |                                      | 2     |

**Categorical Variable Information**

|        |                                      |                    | N     | Percent |
|--------|--------------------------------------|--------------------|-------|---------|
| Factor | Exposure to the pandemia environment | Exposed (2020)     | 32691 | 50,0%   |
|        |                                      | Non-Exposed (2019) | 32691 | 50,0%   |
|        |                                      | Total              | 65382 | 100,0%  |
|        | Gender                               | Male               | 19418 | 29,7%   |
|        |                                      | Female             | 45964 | 70,3%   |
|        |                                      | Total              | 65382 | 100,0%  |

**Continuous Variable Information**

|                    |                                                                                            | N     | Minimum | Maximum | Mean   | Std. Deviation |
|--------------------|--------------------------------------------------------------------------------------------|-------|---------|---------|--------|----------------|
| Dependent Variable | Events of work absence due to MENTAL DISEASE occurring in the period per 100 professionals | 65382 | ,00     | 800,00  | 4,4370 | 29,40783       |

**Goodness of Fit<sup>a</sup>**

|                                                                                   | Value    |
|-----------------------------------------------------------------------------------|----------|
| Quasi Likelihood under Independence Model Criterion (QIC) <sup>b</sup>            | 4352,568 |
| Corrected Quasi Likelihood under Independence Model Criterion (QICC) <sup>b</sup> | 4356,937 |

Dependent Variable: Events of work absence due to MENTAL DISEASE occurring in the period per 100 professionals

Model: (Intercept), Exposure to the pandemia environment, Gender<sup>a</sup>

- a. Information criteria are in smaller-is-better form.
- b. Computed using the full log quasi-likelihood function.

**Tests of Model Effects**

| Source                               | Wald Chi-Square | Type III<br>df | Sig. |
|--------------------------------------|-----------------|----------------|------|
| (Intercept)                          | 1058,402        | 1              | ,000 |
| Exposure to the pandemia environment | 32,060          | 1              | ,000 |
| Gender                               | 105,628         | 1              | ,000 |

Dependent Variable: Events of work absence due to MENTAL DISEASE occurring in the period per 100 professionals

Model: (Intercept), Exposure to the pandemia environment, Gender

**Parameter Estimates**

| Parameter                                | B                    | Std. Error | 95% Wald Confidence Interval |       | Hypothesis Test |    |      | Exp(B) | 95% Wald Confidence Interval for Exp(B) |       |
|------------------------------------------|----------------------|------------|------------------------------|-------|-----------------|----|------|--------|-----------------------------------------|-------|
|                                          |                      |            | Lower                        | Upper | Wald Chi-Square | df | Sig. |        | Lower                                   | Upper |
| (Intercept)                              | 1,526                | ,0426      | 1,443                        | 1,610 | 1284,167        | 1  | ,000 | 4,600  | 4,232                                   | 5,000 |
| [Exposure to the pandemia environment=1] | ,274                 | ,0505      | ,175                         | ,373  | 29,424          | 1  | ,000 | 1,315  | 1,191                                   | 1,449 |
| [Exposure to the pandemia environment=0] | 0 <sup>a</sup>       | .          | .                            | .     | .               | .  | .    | 1      | .                                       | .     |
| [Gender=1]                               | -,796                | ,0774      | -,947                        | -,644 | 105,628         | 1  | ,000 | ,451   | ,388                                    | ,519  |
| [Gender=0]                               | 0 <sup>a</sup>       | .          | .                            | .     | .               | .  | .    | 1      | .                                       | .     |
| (Scale)                                  | 1                    |            |                              |       |                 |    |      |        |                                         |       |
| (Negative binomial)                      | 225,555 <sup>b</sup> |            |                              |       |                 |    |      |        |                                         |       |

Dependent Variable: Events of work absence due to MENTAL DISEASE occurring in the period per 100 professionals

Model: (Intercept), Exposure to the pandemia environment, Gender

- a. Set to zero because this parameter is redundant.
- b. Fixed at the displayed value.

### Estimated Marginal Means 1: Exposure to the pandemia environment

| Exposure to the pandemia environment | Estimates |            | 95% Wald Confidence Interval |        |
|--------------------------------------|-----------|------------|------------------------------|--------|
|                                      | Mean      | Std. Error | Lower                        | Upper  |
| Exposed (2020)                       | 4,0650    | ,17595     | 3,7343                       | 4,4249 |
| Non-Exposed (2019)                   | 3,0533    | ,14960     | 2,7737                       | 3,3610 |

### Estimated Marginal Means 2: Gender

| Gender | Mean | Std. Error | Estimates                    |       |
|--------|------|------------|------------------------------|-------|
|        |      |            | 95% Wald Confidence Interval |       |
|        |      |            | Lower                        | Upper |
|        |      |            |                              |       |

## Supporting Information. Data Analysis. Part2

|        |        |        |        |        |
|--------|--------|--------|--------|--------|
| Male   | 2,3667 | ,16752 | 2,0601 | 2,7189 |
| Female | 5,2442 | ,16441 | 4,9317 | 5,5766 |

```

DATASET ACTIVATE DataSet2.
T-TEST PAIRS=AbMnt_N_T2 WITH AbMnt_N_T1 (PAIRED)
/CRITERIA=CI (.9500)
/MISSING=ANALYSIS.

```

**T-Test**

[DataSet2] C:\Users\trabalho\Documents\COVID-19\Centro Pesquisa HUB COVID19\BDForceII\_AbsperInd\_Horiz.sav

**Paired Samples Statistics**

|        |                                                                           | Mean  | N     | Std. Deviation | Std. Error Mean |
|--------|---------------------------------------------------------------------------|-------|-------|----------------|-----------------|
| Pair 1 | Events of work absence due to MENTAL DISEASE occurring in the period - T2 | ,0508 | 32691 | ,3117          | ,0017           |
|        | Events of work absence due to MENTAL DISEASE occurring in the period - T1 | ,0379 | 32691 | ,2752          | ,0015           |

**Paired Samples Correlations**

|        |                                                                                                                                                       | N     | Correlation | Sig. |
|--------|-------------------------------------------------------------------------------------------------------------------------------------------------------|-------|-------------|------|
| Pair 1 | Events of work absence due to MENTAL DISEASE occurring in the period - T2 & Events of work absence due to MENTAL DISEASE occurring in the period - T1 | 32691 | ,198        | ,000 |

**Paired Samples Test**

|        |                                                                                                                                                       | Paired Differences |                |                 |                                           |       | t     | df    | Sig. (2-tailed) |
|--------|-------------------------------------------------------------------------------------------------------------------------------------------------------|--------------------|----------------|-----------------|-------------------------------------------|-------|-------|-------|-----------------|
|        |                                                                                                                                                       | Mean               | Std. Deviation | Std. Error Mean | 95% Confidence Interval of the Difference |       |       |       |                 |
|        |                                                                                                                                                       |                    |                |                 | Lower                                     | Upper |       |       |                 |
| Pair 1 | Events of work absence due to MENTAL DISEASE occurring in the period - T2 - Events of work absence due to MENTAL DISEASE occurring in the period - T1 | ,0129              | ,3727          | ,0021           | ,0089                                     | ,0170 | 6,277 | 32690 | ,000            |

GET

FILE='C:\Users\trabalho\Documents\COVID-19\Centro Pesquisa HUB COVID19\BDForceII\_AbsperInd\_Vertic.sav'.



Supporting Information. Data Analysis. Part2

```
DATASET NAME DataSet1 WINDOW=FRONT.  
GET  
  FILE='C:\Users\trabalho\Documents\COVID-19\Centro Pesquisa HUB COVID19\BDForceII_AbsperInd_Horiz.sav'.  
DATASET NAME DataSet2 WINDOW=FRONT.  
*Nonparametric Tests: Related Samples.  
NPTESTS  
  /RELATED TEST(AbMnt_N_T1 AbMnt_N_T2)  
  /MISSING SCOPE=ANALYSIS USERMISSING=EXCLUDE  
  /CRITERIA ALPHA=0.05 CILEVEL=95.
```

## Nonparametric Tests

[DataSet2] C:\Users\trabalho\Documents\COVID-19\Centro Pesquisa HUB COVID19\BDForceII\_AbsperInd\_Horiz.sav

null : null

**Hypothesis Test Summary**

|   | Null Hypothesis                                                                                                                                                                                      | Test                                      | Sig. | Decision                    |
|---|------------------------------------------------------------------------------------------------------------------------------------------------------------------------------------------------------|-------------------------------------------|------|-----------------------------|
| 1 | The median of differences between Events of work absence due to MENTAL DISEASE occurring in the period - T1 and Events of work absence due to MENTAL DISEASES occurring in the period - T2 equals 0. | Related-Samples Wilcoxon Signed Rank Test | ,000 | Reject the null hypothesis. |

Asymptotic significances are displayed. The significance level is ,05.

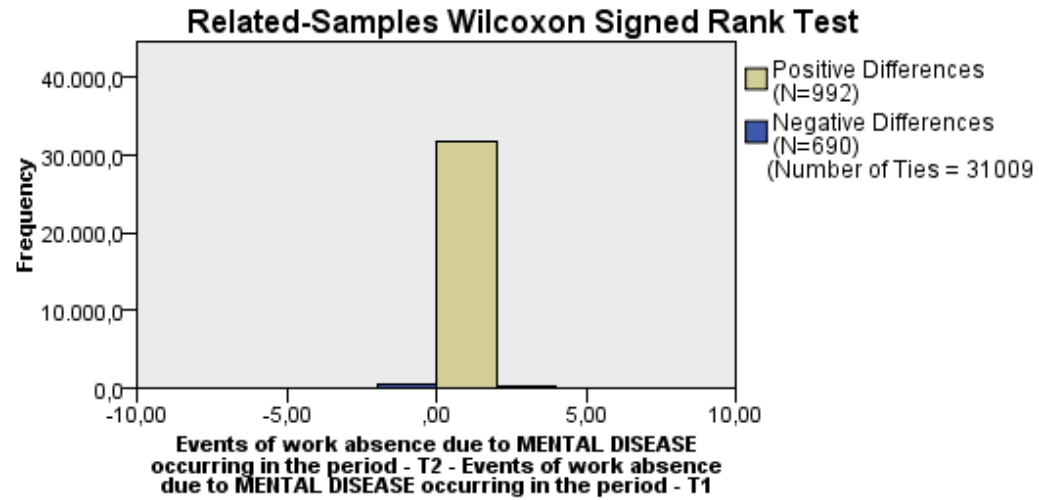

|                                       |             |
|---------------------------------------|-------------|
| <b>Total N</b>                        | 32.691      |
| <b>Test Statistic</b>                 | 834.347,500 |
| <b>Standard Error</b>                 | 19.069,593  |
| <b>Standardized Test Statistic</b>    | 6,641       |
| <b>Asymptotic Sig. (2-sided test)</b> | ,000        |

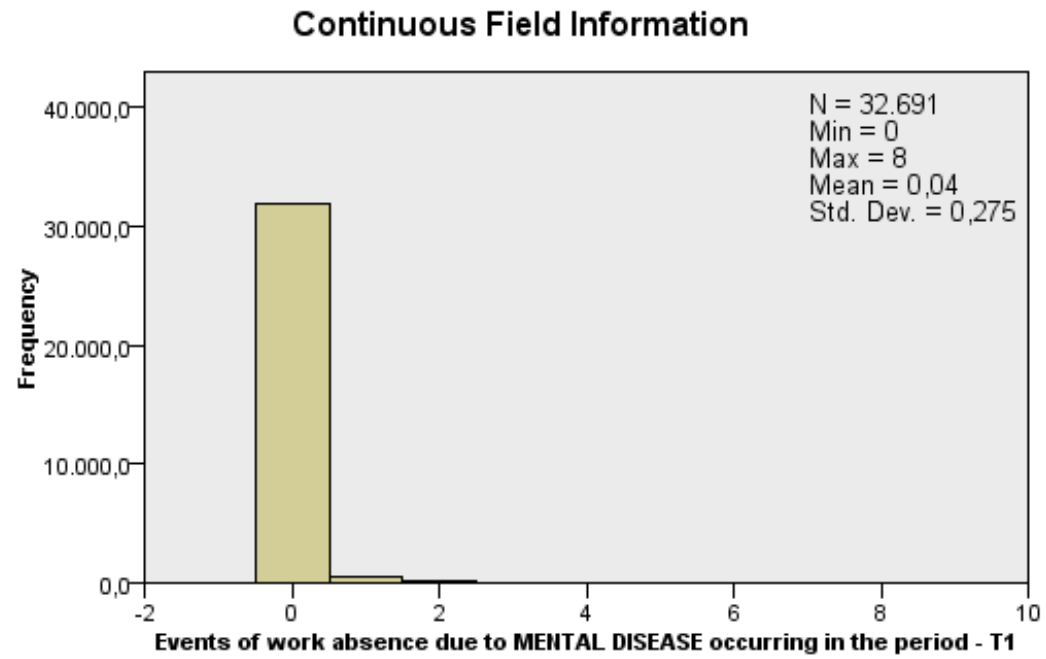

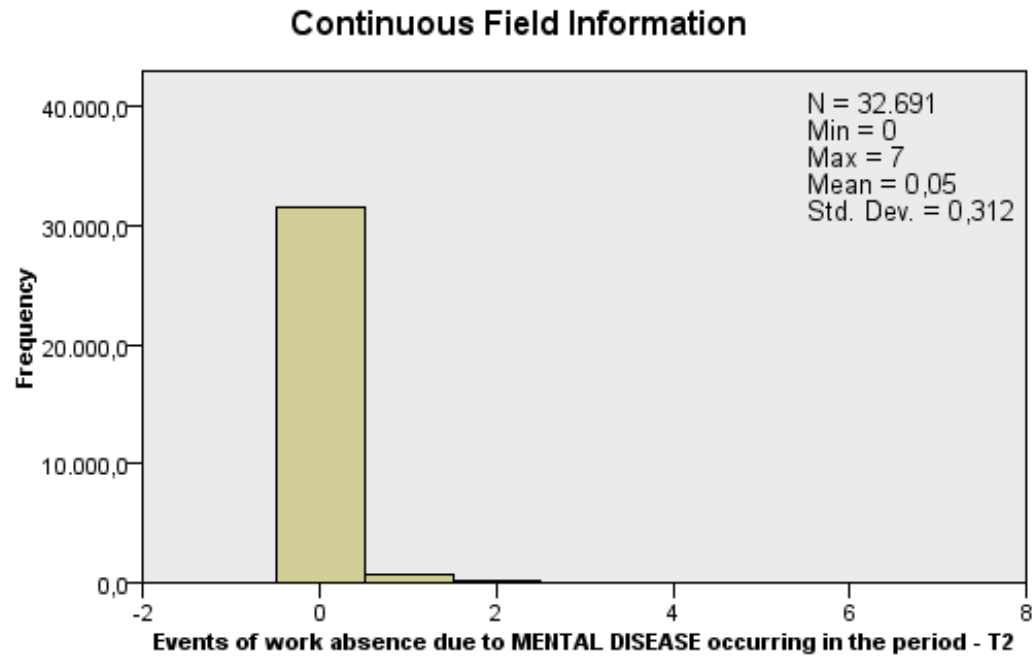

Supporting Information. Continues in the next file.
