# Supplementary material for: Impact of COVID-19 on the mental health of public university hospital workers in Brazil: A cohort-based analysis of 32,691 workers
Source: PubMed Central journal article supplement (PMC9202958; doi:10.1371/journal.pone.0269318), 2022-06-16
Supplement: pone.0269318.s003.pdf [file pone.0269318.s003.pdf]

|       |       |
|-------|-------|
| Total | 65382 |
|-------|-------|

| Model Dimension <sup>a</sup> |                        |                  |                      |                      |                   |
|------------------------------|------------------------|------------------|----------------------|----------------------|-------------------|
|                              |                        | Number of Levels | Covariance Structure | Number of Parameters | Subject Variables |
| Fixed Effects                | Intercept              | 1                |                      | 1                    |                   |
|                              | AsgnGrp                | 2                |                      | 1                    |                   |
|                              | Sex                    | 2                |                      | 1                    |                   |
| Random Effects               | Intercept <sup>b</sup> | 1                | Variance Components  | 1                    | ID                |
| Residual                     |                        |                  |                      | 1                    |                   |
| Total                        |                        | 6                |                      | 5                    |                   |

a. Dependent Variable: Duration (days) of work absence due to MENTAL DISEASE in the period.

b. As of version 11.5, the syntax rules for the RANDOM subcommand have changed. Your command syntax may yield results that differ from those produced by prior versions. If you are using version 11 syntax, please consult the current syntax reference guide for more information.

| Information Criteria <sup>a</sup>    |           |
|--------------------------------------|-----------|
| -2 Restricted Log Likelihood         | 18343,973 |
| Akaike's Information Criterion (AIC) | 18347,973 |
| Hurvich and Tsai's Criterion (AICC)  | 18347,979 |
| Bozdogan's Criterion (CAIC)          | 18361,107 |
| Schwarz's Bayesian Criterion (BIC)   | 18359,107 |

The information criteria are displayed in smaller-is-better form.

a. Dependent Variable: Duration (days) of work absence due to MENTAL DISEASE in the period.

## Fixed Effects

| Type III Tests of Fixed Effects <sup>a</sup> |              |                |         |      |
|----------------------------------------------|--------------|----------------|---------|------|
| Source                                       | Numerator df | Denominator df | F       | Sig. |
| Intercept                                    | 1            | 1745,206       | 564,543 | ,000 |
| AsgnGrp                                      | 1            | 1680,051       | 10,242  | ,001 |
| Sex                                          | 1            | 1743,641       | 2,451   | ,118 |

a. Dependent Variable: Duration (days) of work absence due to MENTAL DISEASE in the period.

| Estimates of Fixed Effects <sup>a</sup> |                |            |          |        |      |                         |             |
|-----------------------------------------|----------------|------------|----------|--------|------|-------------------------|-------------|
| Parameter                               | Estimate       | Std. Error | df       | t      | Sig. | 95% Confidence Interval |             |
|                                         |                |            |          |        |      | Lower Bound             | Upper Bound |
| Intercept                               | 24,060707      | 1,673694   | 1824,212 | 14,376 | ,000 | 20,778149               | 27,343266   |
| [AsgnGrp=0]                             | -4,042402      | 1,263123   | 1680,051 | -3,200 | ,001 | -6,519862               | -1,564942   |
| [AsgnGrp=1]                             | 0 <sup>b</sup> | 0          | .        | .      | .    | .                       | .           |
| [Sex=0]                                 | -2,708456      | 1,730011   | 1743,641 | -1,566 | ,118 | -6,101572               | ,684659     |
| [Sex=1]                                 | 0 <sup>b</sup> | 0          | .        | .      | .    | .                       | .           |

a. Dependent Variable: Duration (days) of work absence due to MENTAL DISEASE in the period.

b. This parameter is set to zero because it is redundant.

## Covariance Parameters

| Estimates of Covariance Parameters <sup>a</sup> |          |            |            |
|-------------------------------------------------|----------|------------|------------|
| Parameter                                       |          | Estimate   | Std. Error |
| Residual                                        |          | 698,747452 | 50,320312  |
| Intercept [subject = ID]                        | Variance | 68,501479  | 45,860717  |

a. Dependent Variable: Duration (days) of work absence due to MENTAL DISEASE in the period.

## Estimated Marginal Means

| 1. Exposure to the pandemia environment <sup>a</sup> |        |            |          |                         |             |
|------------------------------------------------------|--------|------------|----------|-------------------------|-------------|
| Exposure to the pandemia environment                 | Mean   | Std. Error | df       | 95% Confidence Interval |             |
|                                                      |        |            |          | Lower Bound             | Upper Bound |
| Non-Exposed (2019)                                   | 18,664 | 1,132      | 1924,946 | 16,444                  | 20,884      |
| Exposed (2020)                                       | 22,706 | 1,016      | 1913,271 | 20,714                  | 24,699      |

a. Dependent Variable: Duration (days) of work absence due to MENTAL DISEASE in the period.

| 2. Gender <sup>a</sup> |        |            |          |                         |             |
|------------------------|--------|------------|----------|-------------------------|-------------|
| Gender                 | Mean   | Std. Error | df       | 95% Confidence Interval |             |
|                        |        |            |          | Lower Bound             | Upper Bound |
| Female                 | 19,331 | ,700       | 1741,223 | 17,959                  | 20,704      |
| Male                   | 22,040 | 1,588      | 1745,049 | 18,924                  | 25,155      |

a. Dependent Variable: Duration (days) of work absence due to MENTAL DISEASE in the period.

Gender differences regarding proportions of individuals with work absences due to mental disease

\* Custom Tables.

```
CTABLES
/VLABELS VARIABLES=AbMnt AsgnGrp Sex DISPLAY=DEFAULT
/TABLE AbMnt [C] BY AsgnGrp [C] > Sex [C][COUNT F40.0, COLPCT.COUNT PCT40.1]
/CATEGORIES VARIABLES=AbMnt Sex ORDER=A KEY=VALUE EMPTY=INCLUDE TOTAL=YES POSITION=AFTER
/CATEGORIES VARIABLES=AsgnGrp ORDER=A KEY=VALUE EMPTY=INCLUDE
/CRITERIA CILEVEL=95.
```

### Custom Tables

|                                                               |     | Exposure to the pandemia environment |            |       |            |       |                |       |            |       |            |       |         |
|---------------------------------------------------------------|-----|--------------------------------------|------------|-------|------------|-------|----------------|-------|------------|-------|------------|-------|---------|
|                                                               |     | Non-Exposed (2019)                   |            |       |            |       | Exposed (2020) |       |            |       |            |       |         |
|                                                               |     | Gender                               |            |       |            |       | Gender         |       |            |       |            |       |         |
|                                                               |     | Female                               |            | Male  |            | Total | Female         |       | Male       |       | Total      |       |         |
|                                                               |     | Count                                | Column N % | Count | Column N % | Count | Column N %     | Count | Column N % | Count | Column N % |       |         |
| Any work absence due to MENTAL DISEASE occurred in the period | No  | 22298                                | 97,02%     | 9577  | 98,64%     | 31875 | 97,50%         | 22040 | 95,90%     | 9531  | 98,17%     | 31571 | 96,57%  |
|                                                               | Yes | 684                                  | 2,98%      | 132   | 1,36%      | 816   | 2,50%          | 942   | 4,10%      | 178   | 1,83%      | 1120  | 3,43%   |
| Total                                                         |     | 22982                                | 100,00%    | 9709  | 100,00%    | 32691 | 100,00%        | 22982 | 100,00%    | 9709  | 100,00%    | 32691 | 100,00% |

\* Chart Builder.

```
GGRAPH
/GRAPHDATASET NAME="graphdataset" VARIABLES=AbMnt COUNT([name="COUNT"]) Sex AsgnGrp
MISSING=LISTWISE REPORTMISSING=NO
/GRAPHSPEC SOURCE=INLINE.
BEGIN GPL
SOURCE: s=userSource(id("graphdataset"))
DATA: AbMnt=col(source(s), name("AbMnt")),
notIn("0"), unit.category())
DATA: COUNT=col(source(s), name("COUNT"))
DATA: Sex=col(source(s), name("Sex"), unit.category())
DATA: AsgnGrp=col(source(s), name("AsgnGrp"), unit.category())
COORD: rect(dim(1,2), cluster(3,0))
GUIDE: axis(dim(3), label("Any work absence due to MENTAL DISEASE occurred in the period"))
GUIDE: axis(dim(2), label("Count"))
GUIDE: axis(dim(4), label("Exposure to the pandemia environment"), opposite())
GUIDE: legend(aesthetic(aesthetic.color.interior), label("Gender"))
GUIDE: text.title(label("Clustered Bar Count of Any work absence due to MENTAL DISEASE ",
"occurred in the period by Gender by Exposure to the pandemia environment"))
SCALE: cat(dim(3), include("1"))
SCALE: linear(dim(2), include(0))
SCALE: cat(dim(4), include("0", "1"))
SCALE: cat(aesthetic(aesthetic.color.interior), include("0", "1"))
SCALE: cat(dim(1), include("0", "1"))
ELEMENT: interval(position(Sex*COUNT*AbMnt*AsgnGrp), color.interior(Sex),
shape.interior(shape.square))
END GPL.
```

GGraph

**Clustered Bar Count of Any work absence due to MENTAL DISEASE occurred in the period by Gender by Exposure to the pandemia environment**

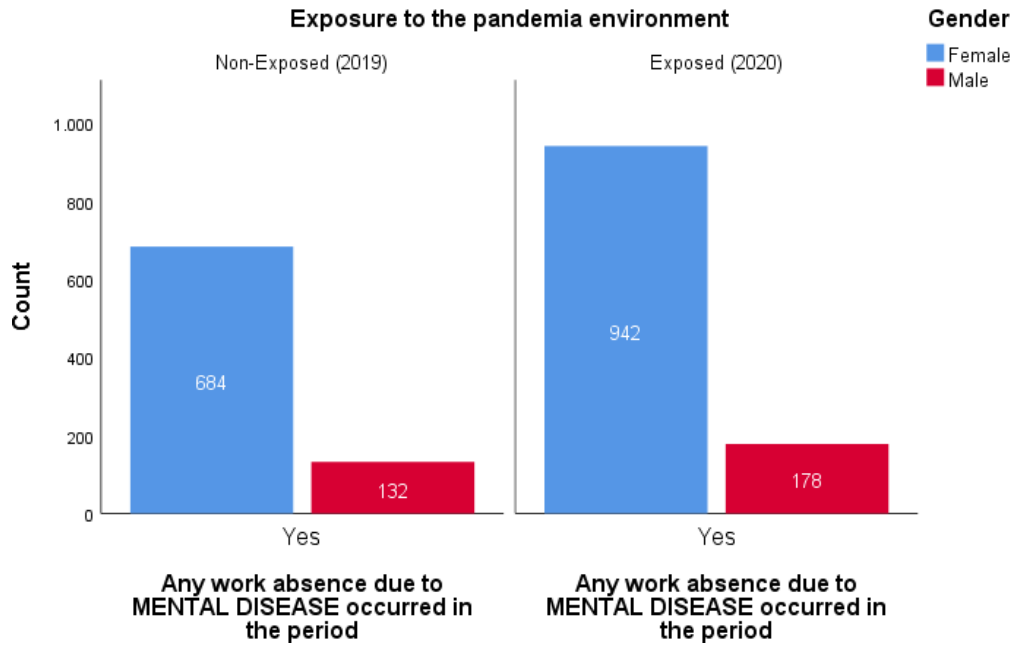

\* Chart Builder.

```
GGRAPH
/GRAPHDATASET NAME="graphdataset" VARIABLES=AbMnt COUNT([name="COUNT"] Sex AsgnGrp
MISSING=LISTWISE REPORTMISSING=NO
/GRAPHSPEC SOURCE=INLINE.
BEGIN GPL
SOURCE: s=userSource(id("graphdataset"))
DATA: AbMnt=col(source(s), name("AbMnt"), unit.category())
DATA: COUNT=col(source(s), name("COUNT"))
DATA: Sex=col(source(s), name("Sex"), unit.category())
DATA: AsgnGrp=col(source(s), name("AsgnGrp"), unit.category())
COORD: rect(dim(1,2), cluster(3,0))
GUIDE: axis(dim(3), label("Any work absence due to MENTAL DISEASE occurred in the period"))
GUIDE: axis(dim(2), label("Percent"))
GUIDE: axis(dim(4), label("Exposure to the pandemia environment"), opposite())
GUIDE: legend(aesthetic(aesthetic.color.interior), label("Gender"))
GUIDE: text.title(label("Clustered Bar Percent of Any work absence due to MENTAL DISEASE ",
"occurred in the period by Gender by Exposure to the pandemia environment"))
SCALE: cat(dim(3), include("1", "0"), sort.values("1", "0"))
SCALE: linear(dim(2), include(0))
SCALE: cat(dim(4), include("0", "1"))
SCALE: cat(aesthetic(aesthetic.color.interior), include("0", "1"))
SCALE: cat(dim(1), include("0", "1"))
ELEMENT: interval(position(summary.percent(Sex*COUNT*AbMnt*AsgnGrp,
base.aesthetic(aesthetic(aesthetic.color.interior))), color.interior(Sex),
shape.interior(shape.square))
END GPL.
```

GGraph

**Clustered Bar Percent of Any work absence due to MENTAL DISEASE occurred in the period by Gender by Exposure to the pandemia environment**

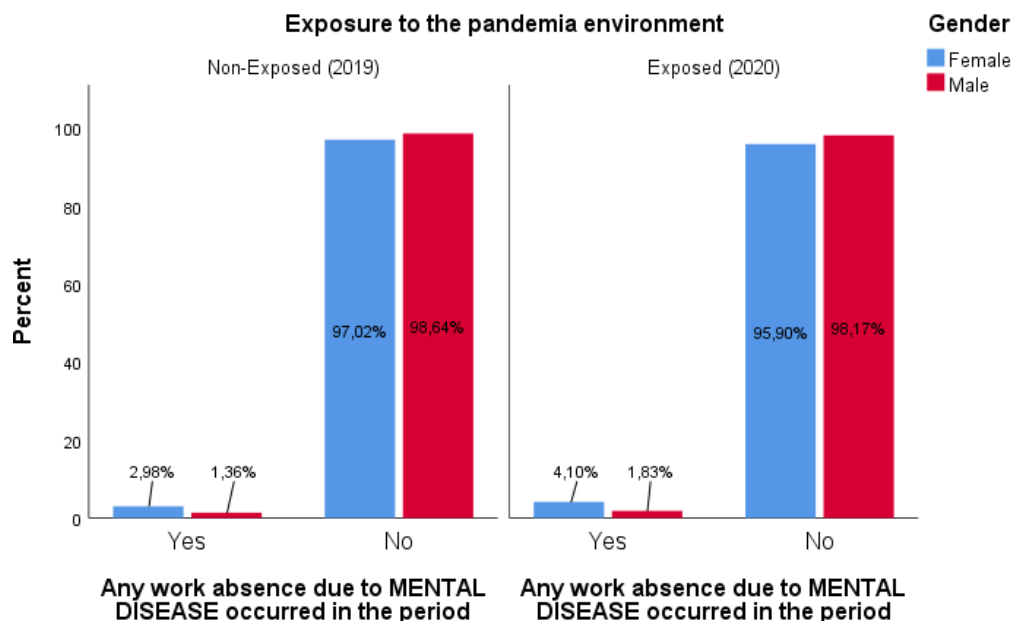

**\* Generalized Estimating Equations.**

```

GENLIN AbMnt (REFERENCE=FIRST) BY AsgnGrp Sex (ORDER=DESCENDING)
/MODEL AsgnGrp Sex AsgnGrp*Sex INTERCEPT=YES
DISTRIBUTION=BINOMIAL LINK=LOGIT
/CRITERIA METHOD=FISHER(1) SCALE=1 MAXITERATIONS=100 MAXSTEPHALVING=5 PCONVERGE=1E-006 (ABSOLUTE)
SINGULAR=1E-012 ANALYSISTYPE=3 (WALD) CILEVEL=95 LIKELIHOOD=FULL
/REPEATED SUBJECT=ID WITHINSUBJECT=AsgnGrp SORT=YES CORRTYPE=UNSTRUCTURED ADJUSTCORR=YES
COVB=ROBUST MAXITERATIONS=100 PCONVERGE=1e-006 (ABSOLUTE) UPDATECORR=1
/MISSING CLASSMISSING=EXCLUDE
/PRINT CPS DESCRIPTIVES MODELINFO FIT SUMMARY SOLUTION (EXPONENTIATED).
    
```

**Generalized Linear Models**

| Model Information                    |                                                                            |
|--------------------------------------|----------------------------------------------------------------------------|
| Dependent Variable                   | Any work absence due to MENTAL DISEASE occurred in the period <sup>a</sup> |
| Probability Distribution             | Binomial                                                                   |
| Link Function                        | Logit                                                                      |
| Subject Effect                       | 1 ID                                                                       |
| Within-Subject Effect                | 1 Exposure to the pandemia environment                                     |
| Working Correlation Matrix Structure | Unstructured                                                               |

a. The procedure models Yes as the response, treating No as the reference category.

| Case Processing Summary |       |         |
|-------------------------|-------|---------|
|                         | N     | Percent |
| Included                | 65382 | 100,0%  |
| Excluded                | 0     | 0,0%    |
| Total                   | 65382 | 100,0%  |

| Correlated Data Summary            |                       |                                      |       |
|------------------------------------|-----------------------|--------------------------------------|-------|
| Number of Levels                   | Subject Effect        | ID                                   | 32691 |
|                                    | Within-Subject Effect | Exposure to the pandemia environment | 2     |
| Number of Subjects                 |                       |                                      | 32691 |
| Number of Measurements per Subject | Minimum               |                                      | 2     |
|                                    | Maximum               |                                      | 2     |
| Correlation Matrix Dimension       |                       |                                      | 2     |

| Categorical Variable Information |                                                               |                    |       |         |
|----------------------------------|---------------------------------------------------------------|--------------------|-------|---------|
|                                  |                                                               |                    | N     | Percent |
| Dependent Variable               | Any work absence due to MENTAL DISEASE occurred in the period | No                 | 63446 | 97,0%   |
|                                  |                                                               | Yes                | 1936  | 3,0%    |
|                                  |                                                               | Total              | 65382 | 100,0%  |
| Factor                           | Exposure to the pandemia environment                          | Exposed (2020)     | 32691 | 50,0%   |
|                                  |                                                               | Non-Exposed (2019) | 32691 | 50,0%   |
|                                  |                                                               | Total              | 65382 | 100,0%  |
|                                  |                                                               | Gender             | Male  | 19418   |
|                                  |                                                               | Female             | 45964 | 70,3%   |
|                                  |                                                               | Total              | 65382 | 100,0%  |

| Goodness of Fit <sup>a</sup>                                                                                                                                                                                      |           |
|-------------------------------------------------------------------------------------------------------------------------------------------------------------------------------------------------------------------|-----------|
|                                                                                                                                                                                                                   | Value     |
| Quasi Likelihood under Independence Model Criterion (QIC) <sup>b</sup>                                                                                                                                            | 17199,741 |
| Corrected Quasi Likelihood under Independence Model Criterion (QICC) <sup>b</sup>                                                                                                                                 | 17199,741 |
| Dependent Variable: Any work absence due to MENTAL DISEASE occurred in the period<br>Model: (Intercept), Exposure to the pandemia environment, Gender, Exposure to the pandemia environment * Gender <sup>a</sup> |           |
| a. Information criteria are in smaller-is-better form.                                                                                                                                                            |           |
| b. Computed using the full log quasi-likelihood function.                                                                                                                                                         |           |

| Tests of Model Effects                                                                                                                                                                               |                 |    |      |
|------------------------------------------------------------------------------------------------------------------------------------------------------------------------------------------------------|-----------------|----|------|
| Source                                                                                                                                                                                               | Type III        |    |      |
|                                                                                                                                                                                                      | Wald Chi-Square | df | Sig. |
| (Intercept)                                                                                                                                                                                          | 11826,317       | 1  | ,000 |
| Exposure to the pandemia environment                                                                                                                                                                 | 30,463          | 1  | ,000 |
| Gender                                                                                                                                                                                               | 141,140         | 1  | ,000 |
| Exposure to the pandemia environment * Gender                                                                                                                                                        | ,059            | 1  | ,809 |
| Dependent Variable: Any work absence due to MENTAL DISEASE occurred in the period<br>Model: (Intercept), Exposure to the pandemia environment, Gender, Exposure to the pandemia environment * Gender |                 |    |      |

| Parameter Estimates                                                                                                                                                                                  |                |            |                              |        |                 |    |      |        |                                         |       |
|------------------------------------------------------------------------------------------------------------------------------------------------------------------------------------------------------|----------------|------------|------------------------------|--------|-----------------|----|------|--------|-----------------------------------------|-------|
| Parameter                                                                                                                                                                                            | B              | Std. Error | 95% Wald Confidence Interval |        | Hypothesis Test |    |      | Exp(B) | 95% Wald Confidence Interval for Exp(B) |       |
|                                                                                                                                                                                                      |                |            | Lower                        | Upper  | Wald Chi-Square | df | Sig. |        | Lower                                   | Upper |
| (Intercept)                                                                                                                                                                                          | -3,484         | ,0388      | -3,560                       | -3,408 | 8056,824        | 1  | ,000 | ,031   | ,028                                    | ,033  |
| [Exposure to the pandemia environment=1]                                                                                                                                                             | ,332           | ,0468      | ,240                         | ,423   | 50,230          | 1  | ,000 | 1,393  | 1,271                                   | 1,527 |
| [Exposure to the pandemia environment=0]                                                                                                                                                             | 0 <sup>a</sup> | .          | .                            | .      | .               | .  | .    | 1      | .                                       | .     |
| [Gender=1]                                                                                                                                                                                           | -,800          | ,0958      | -,988                        | -,612  | 69,668          | 1  | ,000 | ,449   | ,372                                    | ,542  |
| [Gender=0]                                                                                                                                                                                           | 0 <sup>a</sup> | .          | .                            | .      | .               | .  | .    | 1      | .                                       | .     |
| [Exposure to the pandemia environment=1] * [Gender=1]                                                                                                                                                | -,028          | ,1151      | -,254                        | ,198   | ,059            | 1  | ,809 | ,972   | ,776                                    | 1,219 |
| [Exposure to the pandemia environment=1] * [Gender=0]                                                                                                                                                | 0 <sup>a</sup> | .          | .                            | .      | .               | .  | .    | 1      | .                                       | .     |
| [Exposure to the pandemia environment=0] * [Gender=1]                                                                                                                                                | 0 <sup>a</sup> | .          | .                            | .      | .               | .  | .    | 1      | .                                       | .     |
| [Exposure to the pandemia environment=0] * [Gender=0]                                                                                                                                                | 0 <sup>a</sup> | .          | .                            | .      | .               | .  | .    | 1      | .                                       | .     |
| (Scale)                                                                                                                                                                                              | 1              |            |                              |        |                 |    |      |        |                                         |       |
| Dependent Variable: Any work absence due to MENTAL DISEASE occurred in the period<br>Model: (Intercept), Exposure to the pandemia environment, Gender, Exposure to the pandemia environment * Gender |                |            |                              |        |                 |    |      |        |                                         |       |
| a. Set to zero because this parameter is redundant.                                                                                                                                                  |                |            |                              |        |                 |    |      |        |                                         |       |

```

GET
FILE='C:\Users\trabalho\Documents\COVID-19\Centro Pesquisa HUB COVID19\BDForceII_AbsperInd_Horiz.sav'.
DATASET NAME DataSet1 WINDOW=FRONT.
GET
FILE='C:\Users\trabalho\Documents\COVID-19\Centro Pesquisa HUB COVID19\BDForceII_AbsperInd_Vertic.sav'.
DATASET NAME DataSet2 WINDOW=FRONT.
Supporting Information. Continues in the next file.

```
