# Supplementary material for: Impact of COVID-19 on the mental health of public university hospital workers in Brazil: A cohort-based analysis of 32,691 workers
Source: PubMed Central journal article supplement (PMC9202958; doi:10.1371/journal.pone.0269318), 2022-06-16
Supplement: pone.0269318.s004.pdf [file pone.0269318.s004.pdf]

## Gender differences as to proportions of individuals with work absences due to ALL CAUSES

```
* Generalized Estimating Equations.  
GENLIN AbAC (REFERENCE=FIRST) BY AsgnGrp Sex (ORDER=DESCENDING)  
  /MODEL AsgnGrp Sex AsgnGrp*Sex INTERCEPT=YES  
  DISTRIBUTION=BINOMIAL LINK=LOGIT  
  /CRITERIA METHOD=FISHER(1) SCALE=1 MAXITERATIONS=100 MAXSTEPHALVING=5 PCONVERGE=1E-006 (ABSOLUTE)  
    SINGULAR=1E-012 ANALYSISTYPE=3 (WALD) CILEVEL=95 LIKELIHOOD=FULL  
  /REPEATED SUBJECT=ID WITHINSUBJECT=AsgnGrp SORT=YES CORRTYPE=UNSTRUCTURED ADJUSTCORR=YES  
    COVB=ROBUST MAXITERATIONS=100 PCONVERGE=1e-006 (ABSOLUTE) UPDATECORR=1  
  /MISSING CLASSMISSING=EXCLUDE  
  /PRINT CPS DESCRIPTIVES MODELINFO FIT SUMMARY SOLUTION (EXPONENTIATED).
```

## Generalized Linear Models

[DataSet2] C:\Users\trabalho\Documents\COVID-19\Centro Pesquisa HUB COVID19\BDForceII\_AbsperInd\_Vertic.sav

### Model Information

|                          |                                                                           |
|--------------------------|---------------------------------------------------------------------------|
| Dependent Variable       | Any work absence due to ALL<br>CAUSES occurred in the period <sup>a</sup> |
| Probability Distribution | Binomial                                                                  |

|                                      |   |                                      |
|--------------------------------------|---|--------------------------------------|
| Link Function                        |   | Logit                                |
| Subject Effect                       | 1 | ID                                   |
| Within-Subject Effect                | 1 | Exposure to the pandemia environment |
| Working Correlation Matrix Structure |   | Unstructured                         |

a. The procedure models Yes as the response, treating No as the reference category.

### Case Processing Summary

|          | N     | Percent |
|----------|-------|---------|
| Included | 65382 | 100,0%  |
| Excluded | 0     | 0,0%    |
| Total    | 65382 | 100,0%  |

### Correlated Data Summary

|                                    |                       |                                      |       |
|------------------------------------|-----------------------|--------------------------------------|-------|
| Number of Levels                   | Subject Effect        | ID                                   | 32691 |
|                                    | Within-Subject Effect | Exposure to the pandemia environment | 2     |
| Number of Subjects                 |                       |                                      | 32691 |
| Number of Measurements per Subject | Minimum               |                                      | 2     |
|                                    | Maximum               |                                      | 2     |
| Correlation Matrix Dimension       |                       |                                      | 2     |

**Categorical Variable Information**

|                    |                                                           |                    | N     | Percent |
|--------------------|-----------------------------------------------------------|--------------------|-------|---------|
| Dependent Variable | Any work absence due to ALL CAUSES occurred in the period | No                 | 34347 | 52,5%   |
|                    |                                                           | Yes                | 31035 | 47,5%   |
|                    |                                                           | Total              | 65382 | 100,0%  |
| Factor             | Exposure to the pandemia environment                      | Exposed (2020)     | 32691 | 50,0%   |
|                    |                                                           | Non-Exposed (2019) | 32691 | 50,0%   |
|                    |                                                           | Total              | 65382 | 100,0%  |
|                    | Gender                                                    | Male               | 19418 | 29,7%   |
|                    |                                                           | Female             | 45964 | 70,3%   |
|                    |                                                           | Total              | 65382 | 100,0%  |

**Goodness of Fit<sup>a</sup>**

|                                                                                   | Value     |
|-----------------------------------------------------------------------------------|-----------|
| Quasi Likelihood under Independence Model Criterion (QIC) <sup>b</sup>            | 88626,933 |
| Corrected Quasi Likelihood under Independence Model Criterion (QICC) <sup>b</sup> | 88626,933 |

Supporting Information Part 4

Dependent Variable: Any work absence due to ALL CAUSES occurred in the period

Model: (Intercept), Exposure to the pandemic environment, Gender, Exposure to the pandemic environment \* Gender<sup>a</sup>

- a. Information criteria are in smaller-is-better form.
- b. Computed using the full log quasi-likelihood function.

**Parameter Estimates**

| Parameter                                             | B              | Std. Error | 95% Wald Confidence Interval |       | Hypothesis Test |    |      | Exp(B) | 95% Wald Confidence Interval for Exp(B) |       |
|-------------------------------------------------------|----------------|------------|------------------------------|-------|-----------------|----|------|--------|-----------------------------------------|-------|
|                                                       |                |            | Lower                        | Upper | Wald Chi-Square | df | Sig. |        | Lower                                   | Upper |
| (Intercept)                                           | ,249           | ,0133      | ,223                         | ,275  | 349,643         | 1  | ,000 | 1,282  | 1,249                                   | 1,316 |
| [Exposure to the pandemia environment=1]              | -,313          | ,0166      | -,346                        | -,281 | 354,884         | 1  | ,000 | ,731   | ,708                                    | ,755  |
| [Exposure to the pandemia environment=0]              | 0 <sup>a</sup> | .          | .                            | .     | .               | .  | .    | 1      | .                                       | .     |
| [Gender=1]                                            | -,663          | ,0246      | -,712                        | -,615 | 725,252         | 1  | ,000 | ,515   | ,491                                    | ,541  |
| [Gender=0]                                            | 0 <sup>a</sup> | .          | .                            | .     | .               | .  | .    | 1      | .                                       | .     |
| [Exposure to the pandemia environment=1] * [Gender=1] | -,009          | ,0315      | -,071                        | ,053  | ,083            | 1  | ,773 | ,991   | ,932                                    | 1,054 |
| [Exposure to the pandemia environment=1] * [Gender=0] | 0 <sup>a</sup> | .          | .                            | .     | .               | .  | .    | 1      | .                                       | .     |
| [Exposure to the pandemia environment=0] * [Gender=1] | 0 <sup>a</sup> | .          | .                            | .     | .               | .  | .    | 1      | .                                       | .     |
| [Exposure to the pandemia environment=0] * [Gender=0] | 0 <sup>a</sup> | .          | .                            | .     | .               | .  | .    | 1      | .                                       | .     |
| (Scale)                                               | 1              |            |                              |       |                 |    |      |        |                                         |       |

Dependent Variable: Any work absence due to ALL CAUSES occurred in the period

Model: (Intercept), Exposure to the pandemia environment, Gender, Exposure to the pandemia environment \* Gender

a. Set to zero because this parameter is redundant.

**Tests of Model Effects**

Source

Type III

|                                               | Wald Chi-Square | df | Sig. |
|-----------------------------------------------|-----------------|----|------|
| (Intercept)                                   | 619,880         | 1  | ,000 |
| Exposure to the pandemia environment          | 407,937         | 1  | ,000 |
| Gender                                        | 1180,095        | 1  | ,000 |
| Exposure to the pandemia environment * Gender | ,083            | 1  | ,773 |

Dependent Variable: Any work absence due to ALL CAUSES occurred in the period

Model: (Intercept), Exposure to the pandemia environment, Gender, Exposure to the pandemia environment \* Gender

## Gender differences as to proportions of individuals with work absences due to ADMINISTRATIVE CAUSES

\* Generalized Estimating Equations.

GENLIN AbADM (REFERENCE=FIRST) BY AsgnGrp Sex (ORDER=DESCENDING)

/MODEL AsgnGrp Sex INTERCEPT=YES

DISTRIBUTION=BINOMIAL LINK=LOGIT

/CRITERIA METHOD=FISHER(1) SCALE=1 MAXITERATIONS=100 MAXSTEPHALVING=5 PCONVERGE=1E-006 (ABSOLUTE)

SINGULAR=1E-012 ANALYSISTYPE=3 (WALD) CILEVEL=95 LIKELIHOOD=FULL

/REPEATED SUBJECT=ID WITHINSUBJECT=AsgnGrp SORT=YES CORRTYPE=UNSTRUCTURED ADJUSTCORR=YES

COVB=ROBUST MAXITERATIONS=100 PCONVERGE=1e-006 (ABSOLUTE) UPDATECORR=1

/MISSING CLASSMISSING=EXCLUDE

/PRINT CPS DESCRIPTIVES MODELINFO FIT SUMMARY SOLUTION (EXPONENTIATED).

## Generalized Linear Models

### Model Information

|                                      |   |                                                                                   |
|--------------------------------------|---|-----------------------------------------------------------------------------------|
| Dependent Variable                   |   | Any work absence due to ADMINISTRATIVE CAUSES occurred in the period <sup>a</sup> |
| Probability Distribution             |   | Binomial                                                                          |
| Link Function                        |   | Logit                                                                             |
| Subject Effect                       | 1 | ID                                                                                |
| Within-Subject Effect                | 1 | Exposure to the pandemia environment                                              |
| Working Correlation Matrix Structure |   | Unstructured                                                                      |

a. The procedure models Yes as the response, treating No as the reference category.

### Case Processing Summary

|          | N     | Percent |
|----------|-------|---------|
| Included | 65382 | 100,0%  |
| Excluded | 0     | 0,0%    |
| Total    | 65382 | 100,0%  |

### Correlated Data Summary

|                                    |                       |                                      |       |
|------------------------------------|-----------------------|--------------------------------------|-------|
| Number of Levels                   | Subject Effect        | ID                                   | 32691 |
|                                    | Within-Subject Effect | Exposure to the pandemia environment | 2     |
| Number of Subjects                 |                       |                                      | 32691 |
| Number of Measurements per Subject | Minimum               |                                      | 2     |
|                                    | Maximum               |                                      | 2     |
| Correlation Matrix Dimension       |                       |                                      | 2     |

### Categorical Variable Information

|                    |                                                                      |                    | N      | Percent |
|--------------------|----------------------------------------------------------------------|--------------------|--------|---------|
| Dependent Variable | Any work absence due to ADMINISTRATIVE CAUSES occurred in the period | No                 | 58184  | 89,0%   |
|                    |                                                                      | Yes                | 7198   | 11,0%   |
|                    |                                                                      | Total              | 65382  | 100,0%  |
| Factor             | Exposure to the pandemia environment                                 | Exposed (2020)     | 32691  | 50,0%   |
|                    |                                                                      | Non-Exposed (2019) | 32691  | 50,0%   |
|                    |                                                                      | Total              | 65382  | 100,0%  |
|                    | Gender                                                               | Male               | 19418  | 29,7%   |
|                    |                                                                      | Female             | 45964  | 70,3%   |
|                    | Total                                                                | 65382              | 100,0% |         |



**Goodness of Fit<sup>a</sup>**

|                                                                                   | Value     |
|-----------------------------------------------------------------------------------|-----------|
| Quasi Likelihood under Independence Model Criterion (QIC) <sup>b</sup>            | 44983,494 |
| Corrected Quasi Likelihood under Independence Model Criterion (QICC) <sup>b</sup> | 44983,234 |

Dependent Variable: Any work absence due to ADMINISTRATIVE CAUSES occurred in the period

Model: (Intercept), Exposure to the pandemia environment, Gender<sup>a</sup>

- a. Information criteria are in smaller-is-better form.
- b. Computed using the full log quasi-likelihood function.

**Tests of Model Effects**

| Source                               | Wald Chi-Square | Type III<br>df | Sig. |
|--------------------------------------|-----------------|----------------|------|
| (Intercept)                          | 20184,633       | 1              | ,000 |
| Exposure to the pandemia environment | 389,820         | 1              | ,000 |
| Gender                               | 12,238          | 1              | ,000 |

Dependent Variable: Any work absence due to ADMINISTRATIVE CAUSES occurred in the period

Model: (Intercept), Exposure to the pandemia environment, Gender

**Parameter Estimates**

| Parameter                                | B              | Std. Error | 95% Wald Confidence Interval |        | Hypothesis Test |    |      | Exp(B) | 95% Wald Confidence Interval for Exp(B) |       |
|------------------------------------------|----------------|------------|------------------------------|--------|-----------------|----|------|--------|-----------------------------------------|-------|
|                                          |                |            | Lower                        | Upper  | Wald Chi-Square | df | Sig. |        | Lower                                   | Upper |
| (Intercept)                              | -1,845         | ,0182      | -1,881                       | -1,810 | 10251,117       | 1  | ,000 | ,158   | ,152                                    | ,164  |
| [Exposure to the pandemia environment=1] | -.470          | ,0237      | -.517                        | -.424  | 392,101         | 1  | ,000 | ,625   | ,596                                    | ,655  |
| [Exposure to the pandemia environment=0] | 0 <sup>a</sup> | .          | .                            | .      | .               | .  | .    | 1      | .                                       | .     |
| [Gender=1]                               | -.104          | ,0297      | -.162                        | -.046  | 12,238          | 1  | ,000 | ,901   | ,851                                    | ,955  |
| [Gender=0]                               | 0 <sup>a</sup> | .          | .                            | .      | .               | .  | .    | 1      | .                                       | .     |
| (Scale)                                  | 1              |            |                              |        |                 |    |      |        |                                         |       |

Dependent Variable: Any work absence due to ADMINISTRATIVE CAUSES occurred in the period

Model: (Intercept), Exposure to the pandemia environment, Gender

a. Set to zero because this parameter is redundant.

Gender differences as to proportions of individuals with work absences due to HEALTH-RELATED CAUSES

\* Generalized Estimating Equations.

```

GENLIN AbHRel (REFERENCE=FIRST) BY AsgnGrp Sex (ORDER=DESCENDING)
  /MODEL AsgnGrp Sex INTERCEPT=YES
DISTRIBUTION=BINOMIAL LINK=LOGIT
  /CRITERIA METHOD=FISHER(1) SCALE=1 MAXITERATIONS=100 MAXSTEPHALVING=5 PCONVERGE=1E-006 (ABSOLUTE)
  SINGULAR=1E-012 ANALYSISTYPE=3 (WALD) CILEVEL=95 LIKELIHOOD=FULL
  /REPEATED SUBJECT=ID WITHINSUBJECT=AsgnGrp SORT=YES CORRTYPE=UNSTRUCTURED ADJUSTCORR=YES
  COVB=ROBUST MAXITERATIONS=100 PCONVERGE=1e-006 (ABSOLUTE) UPDATECORR=1
  /MISSING CLASSMISSING=EXCLUDE
  /PRINT CPS DESCRIPTIVES MODELINFO FIT SUMMARY SOLUTION (EXPONENTIATED).
    
```

## Generalized Linear Models

### Model Information

|                                      |   |                                                                                   |
|--------------------------------------|---|-----------------------------------------------------------------------------------|
| Dependent Variable                   |   | Any work absence due to HEALTH-RELATED CAUSES occurred in the period <sup>a</sup> |
| Probability Distribution             |   | Binomial                                                                          |
| Link Function                        |   | Logit                                                                             |
| Subject Effect                       | 1 | ID                                                                                |
| Within-Subject Effect                | 1 | Exposure to the pandemic environment                                              |
| Working Correlation Matrix Structure |   | Unstructured                                                                      |

a. The procedure models Yes as the response, treating No as the reference category.

### Case Processing Summary

|          | N     | Percent |
|----------|-------|---------|
| Included | 65382 | 100,0%  |
| Excluded | 0     | 0,0%    |
| Total    | 65382 | 100,0%  |

### Correlated Data Summary

|                                    |                       |                                      |       |
|------------------------------------|-----------------------|--------------------------------------|-------|
| Number of Levels                   | Subject Effect        | ID                                   | 32691 |
|                                    | Within-Subject Effect | Exposure to the pandemia environment | 2     |
| Number of Subjects                 |                       |                                      | 32691 |
| Number of Measurements per Subject | Minimum               |                                      | 2     |
|                                    | Maximum               |                                      | 2     |
| Correlation Matrix Dimension       |                       |                                      | 2     |

### Categorical Variable Information

|                    |                                                                      |       | N     | Percent |
|--------------------|----------------------------------------------------------------------|-------|-------|---------|
| Dependent Variable | Any work absence due to HEALTH-RELATED CAUSES occurred in the period | No    | 40969 | 62,7%   |
|                    |                                                                      | Yes   | 24413 | 37,3%   |
|                    |                                                                      | Total | 65382 | 100,0%  |

|        |                                      |                    |       |        |
|--------|--------------------------------------|--------------------|-------|--------|
| Factor | Exposure to the pandemia environment | Exposed (2020)     | 32691 | 50,0%  |
|        |                                      | Non-Exposed (2019) | 32691 | 50,0%  |
|        |                                      | Total              | 65382 | 100,0% |
| Gender |                                      | Male               | 19418 | 29,7%  |
|        |                                      | Female             | 45964 | 70,3%  |
|        |                                      | Total              | 65382 | 100,0% |

### Goodness of Fit<sup>a</sup>

|                                                                                   | Value     |
|-----------------------------------------------------------------------------------|-----------|
| Quasi Likelihood under Independence Model Criterion (QIC) <sup>b</sup>            | 84266,543 |
| Corrected Quasi Likelihood under Independence Model Criterion (QICC) <sup>b</sup> | 84266,088 |

Dependent Variable: Any work absence due to HEALTH-RELATED CAUSES occurred in the period

Model: (Intercept), Exposure to the pandemia environment, Gender<sup>a</sup>

a. Information criteria are in smaller-is-better form.

b. Computed using the full log quasi-likelihood function.

**Tests of Model Effects**

| Source                               | Wald Chi-Square | Type III<br>df | Sig. |
|--------------------------------------|-----------------|----------------|------|
| (Intercept)                          | 4389,335        | 1              | ,000 |
| Exposure to the pandemia environment | 388,268         | 1              | ,000 |
| Gender                               | 1417,060        | 1              | ,000 |

Dependent Variable: Any work absence due to HEALTH-RELATED CAUSES occurred in the period

Model: (Intercept), Exposure to the pandemia environment, Gender

## Parameter Estimates

| Parameter                                | B              | Std. Error | 95% Wald Confidence Interval |       | Hypothesis Test |    |      | Exp(B) | 95% Wald Confidence Interval for Exp(B) |       |
|------------------------------------------|----------------|------------|------------------------------|-------|-----------------|----|------|--------|-----------------------------------------|-------|
|                                          |                |            | Lower                        | Upper | Wald Chi-Square | df | Sig. |        | Lower                                   | Upper |
| (Intercept)                              | -,161          | ,0126      | -,185                        | -,136 | 162,044         | 1  | ,000 | ,852   | ,831                                    | ,873  |
| [Exposure to the pandemia environment=1] | -,285          | ,0145      | -,313                        | -,256 | 388,268         | 1  | ,000 | ,752   | ,731                                    | ,774  |
| [Exposure to the pandemia environment=0] | 0 <sup>a</sup> | .          | .                            | .     | .               | .  | .    | 1      | .                                       | .     |
| [Gender=1]                               | -,796          | ,0212      | -,838                        | -,755 | 1417,060        | 1  | ,000 | ,451   | ,433                                    | ,470  |
| [Gender=0]                               | 0 <sup>a</sup> | .          | .                            | .     | .               | .  | .    | 1      | .                                       | .     |
| (Scale)                                  | 1              |            |                              |       |                 |    |      |        |                                         |       |

Dependent Variable: Any work absence due to HEALTH-RELATED CAUSES occurred in the period

Model: (Intercept), Exposure to the pandemia environment, Gender

a. Set to zero because this parameter is redundant.

## Comparisons between professional categories

## Custom Tables: comparisons between HCP categories

[DataSet2] C:\Users\User\Documents\Pesquisa\Force II\BDForceII\_AbsperInd\_Vertic.sav

|                                      |                |
|--------------------------------------|----------------|
| Exposure to the pandemia environment |                |
| Non-Exposed (2019)                   | Exposed (2020) |

Supporting Information Part 4

|                                                               |            |                                                                      |       | Count  | Column N % | Count  | Column N % |
|---------------------------------------------------------------|------------|----------------------------------------------------------------------|-------|--------|------------|--------|------------|
| Healthcare provider category                                  | Physicians | Any work absence due to ALL CAUSES occurred in the period            | No    | 4265   | 62,1%      | 4803   | 69,9%      |
|                                                               |            |                                                                      | Yes   | 2606   | 37,9%      | 2068   | 30,1%      |
|                                                               |            |                                                                      | Total | 6871   | 100,0%     | 6871   | 100,0%     |
|                                                               |            | Any work absence due to ADMINISTRATIVE CAUSES occurred in the period | No    | 6025   | 87,7%      | 6561   | 95,5%      |
|                                                               |            |                                                                      | Yes   | 846    | 12,3%      | 310    | 4,5%       |
|                                                               |            |                                                                      | Total | 6871   | 100,0%     | 6871   | 100,0%     |
|                                                               |            | Any work absence due to HEALTH-RELATED CAUSES occurred in the period | No    | 5227   | 76,1%      | 5404   | 78,6%      |
|                                                               |            |                                                                      | Yes   | 1644   | 23,9%      | 1467   | 21,4%      |
|                                                               |            |                                                                      | Total | 6871   | 100,0%     | 6871   | 100,0%     |
|                                                               |            | Any work absence due to MENTAL DISEASE occurred in the period        | No    | 6814   | 99,2%      | 6757   | 98,3%      |
|                                                               |            |                                                                      | Yes   | 57     | 0,8%       | 114    | 1,7%       |
|                                                               |            |                                                                      | Total | 6871   | 100,0%     | 6871   | 100,0%     |
|                                                               | Nurses     | Any work absence due to ALL CAUSES occurred in the period            | No    | 2226   | 40,0%      | 2668   | 47,9%      |
|                                                               |            |                                                                      | Yes   | 3344   | 60,0%      | 2902   | 52,1%      |
|                                                               |            |                                                                      | Total | 5570   | 100,0%     | 5570   | 100,0%     |
|                                                               |            | Any work absence due to ADMINISTRATIVE CAUSES occurred in the period | No    | 4803   | 86,2%      | 5068   | 91,0%      |
|                                                               |            |                                                                      | Yes   | 767    | 13,8%      | 502    | 9,0%       |
|                                                               |            |                                                                      | Total | 5570   | 100,0%     | 5570   | 100,0%     |
|                                                               |            | Any work absence due to HEALTH-RELATED CAUSES occurred in the period | No    | 2808   | 50,4%      | 3214   | 57,7%      |
|                                                               |            |                                                                      | Yes   | 2762   | 49,6%      | 2356   | 42,3%      |
| Total                                                         |            |                                                                      | 5570  | 100,0% | 5570       | 100,0% |            |
| Any work absence due to MENTAL DISEASE occurred in the period |            | No                                                                   | 5382  | 96,6%  | 5300       | 95,2%  |            |
|                                                               |            | Yes                                                                  | 188   | 3,4%   | 270        | 4,8%   |            |
|                                                               |            | Total                                                                | 5570  | 100,0% | 5570       | 100,0% |            |



Supporting Information Part 4

|                                                                      |                                                                      |                                                           |       |        |        |        |        |
|----------------------------------------------------------------------|----------------------------------------------------------------------|-----------------------------------------------------------|-------|--------|--------|--------|--------|
| Physiotherapists                                                     | Any work absence due to ALL CAUSES occurred in the period            | No                                                        | 454   | 44,6%  | 547    | 53,7%  |        |
|                                                                      |                                                                      | Yes                                                       | 565   | 55,4%  | 472    | 46,3%  |        |
|                                                                      |                                                                      | Total                                                     | 1019  | 100,0% | 1019   | 100,0% |        |
|                                                                      | Any work absence due to ADMINISTRATIVE CAUSES occurred in the period | No                                                        | 903   | 88,6%  | 951    | 93,3%  |        |
|                                                                      |                                                                      | Yes                                                       | 116   | 11,4%  | 68     | 6,7%   |        |
|                                                                      |                                                                      | Total                                                     | 1019  | 100,0% | 1019   | 100,0% |        |
|                                                                      | Any work absence due to HEALTH-RELATED CAUSES occurred in the period | No                                                        | 564   | 55,3%  | 649    | 63,7%  |        |
|                                                                      |                                                                      | Yes                                                       | 455   | 44,7%  | 370    | 36,3%  |        |
|                                                                      |                                                                      | Total                                                     | 1019  | 100,0% | 1019   | 100,0% |        |
|                                                                      | Any work absence due to MENTAL DISEASE occurred in the period        | No                                                        | 988   | 97,0%  | 973    | 95,5%  |        |
|                                                                      |                                                                      | Yes                                                       | 31    | 3,0%   | 46     | 4,5%   |        |
|                                                                      |                                                                      | Total                                                     | 1019  | 100,0% | 1019   | 100,0% |        |
|                                                                      | Nurse assistants                                                     | Any work absence due to ALL CAUSES occurred in the period | No    | 4331   | 42,2%  | 4711   | 45,9%  |
|                                                                      |                                                                      |                                                           | Yes   | 5935   | 57,8%  | 5555   | 54,1%  |
|                                                                      |                                                                      |                                                           | Total | 10266  | 100,0% | 10266  | 100,0% |
| Any work absence due to ADMINISTRATIVE CAUSES occurred in the period |                                                                      | No                                                        | 8990  | 87,6%  | 9116   | 88,8%  |        |
|                                                                      |                                                                      | Yes                                                       | 1276  | 12,4%  | 1150   | 11,2%  |        |
|                                                                      |                                                                      | Total                                                     | 10266 | 100,0% | 10266  | 100,0% |        |
| Any work absence due to HEALTH-RELATED CAUSES occurred in the period |                                                                      | No                                                        | 5171  | 50,4%  | 5652   | 55,1%  |        |
|                                                                      |                                                                      | Yes                                                       | 5095  | 49,6%  | 4614   | 44,9%  |        |
|                                                                      |                                                                      | Total                                                     | 10266 | 100,0% | 10266  | 100,0% |        |
| Any work absence due to MENTAL DISEASE occurred in the period        |                                                                      | No                                                        | 9936  | 96,8%  | 9837   | 95,8%  |        |
|                                                                      |                                                                      | Yes                                                       | 330   | 3,2%   | 429    | 4,2%   |        |
|                                                                      |                                                                      | Total                                                     | 10266 | 100,0% | 10266  | 100,0% |        |

| Other HCP                                                            | Any work absence due to ALL CAUSES occurred in the period | No    | 1425   | 44,1%  | 1751   | 54,2%  |
|----------------------------------------------------------------------|-----------------------------------------------------------|-------|--------|--------|--------|--------|
|                                                                      |                                                           | Yes   | 1805   | 55,9%  | 1479   | 45,8%  |
|                                                                      |                                                           | Total | 3230   | 100,0% | 3230   | 100,0% |
| Any work absence due to ADMINISTRATIVE CAUSES occurred in the period | No                                                        | 2710  | 83,9%  | 2891   | 89,5%  |        |
|                                                                      | Yes                                                       | 520   | 16,1%  | 339    | 10,5%  |        |
|                                                                      | Total                                                     | 3230  | 100,0% | 3230   | 100,0% |        |
| Any work absence due to HEALTH-RELATED CAUSES occurred in the period | No                                                        | 1807  | 55,9%  | 2092   | 64,8%  |        |
|                                                                      | Yes                                                       | 1423  | 44,1%  | 1138   | 35,2%  |        |
|                                                                      | Total                                                     | 3230  | 100,0% | 3230   | 100,0% |        |
| Any work absence due to MENTAL DISEASE occurred in the period        | No                                                        | 3151  | 97,6%  | 3106   | 96,2%  |        |
|                                                                      | Yes                                                       | 79    | 2,4%   | 124    | 3,8%   |        |
|                                                                      | Total                                                     | 3230  | 100,0% | 3230   | 100,0% |        |

Are the apparent differences regarding the physicians compared to other HCP, in terms of work absences, significant within each isolate period (2019 and 2020)? No repeated measures.

### Generalized Linear Models

[DataSet1] C:\Users\User\Documents\Pesquisa\Force II\BDForceII\_AbsperInd\_Horiz.sav

### Model Information

|                          |                                                                                       |
|--------------------------|---------------------------------------------------------------------------------------|
| Dependent Variable       | Any work absence due to ALL CAUSES occurred in the period - T2 (exposed) <sup>a</sup> |
| Probability Distribution | Binomial                                                                              |
| Link Function            | Logit                                                                                 |

a. The procedure models Yes as the response, treating No as the reference category.

### Case Processing Summary

|          | N     | Percent |
|----------|-------|---------|
| Included | 26956 | 82,5%   |
| Excluded | 5735  | 17,5%   |
| Total    | 32691 | 100,0%  |

### Categorical Variable Information

|                    |                                                                          |       | N     | Percent |
|--------------------|--------------------------------------------------------------------------|-------|-------|---------|
| Dependent Variable | Any work absence due to ALL CAUSES occurred in the period - T2 (exposed) | No    | 14480 | 53,7%   |
|                    |                                                                          | Yes   | 12476 | 46,3%   |
|                    |                                                                          | Total | 26956 | 100,0%  |

| Factor | Healthcare provider category |                  |       |        |
|--------|------------------------------|------------------|-------|--------|
|        |                              |                  |       |        |
|        |                              | Other HCP        | 3230  | 12,0%  |
|        |                              | Nurse assistants | 10266 | 38,1%  |
|        |                              | Physiotherapists | 1019  | 3,8%   |
|        |                              | Nurses           | 5570  | 20,7%  |
|        |                              | Physicians       | 6871  | 25,5%  |
|        |                              | Total            | 26956 | 100,0% |
| Gender |                              | Male             | 7108  | 26,4%  |
|        |                              | Female           | 19848 | 73,6%  |
|        |                              | Total            | 26956 | 100,0% |

**Goodness of Fit<sup>a</sup>**

|                                      | Value   | df | Value/df |
|--------------------------------------|---------|----|----------|
| Deviance                             | 40,476  | 4  | 10,119   |
| Scaled Deviance                      | 40,476  | 4  |          |
| Pearson Chi-Square                   | 40,366  | 4  | 10,091   |
| Scaled Pearson Chi-Square            | 40,366  | 4  |          |
| Log Likelihood <sup>b</sup>          | -59,590 |    |          |
| Akaike's Information Criterion (AIC) | 131,181 |    |          |
| Finite Sample Corrected AIC (AICC)   | 131,184 |    |          |
| Bayesian Information Criterion (BIC) | 180,392 |    |          |
| Consistent AIC (CAIC)                | 186,392 |    |          |

Dependent Variable: Any work absence due to ALL CAUSES occurred in the period - T2

Model: (Intercept), Healthcare provider category, Gender<sup>a</sup>

- a. Information criteria are in smaller-is-better form.
- b. The full log likelihood function is displayed and used in computing information criteria.

**Omnibus Test<sup>a</sup>**

| Likelihood Ratio Chi-Square | df | Sig. |
|-----------------------------|----|------|
| 1319,679                    | 5  | ,000 |

Dependent Variable: Any work absence due to ALL CAUSES occurred in the period - T2

Model: (Intercept), Healthcare provider category, Gender<sup>a</sup>

- a. Compares the fitted model against the intercept-only model.

## Tests of Model Effects

| Source                       | Wald Chi-Square | Type III |      |
|------------------------------|-----------------|----------|------|
|                              |                 | df       | Sig. |
| (Intercept)                  | 254,526         | 1        | ,000 |
| Healthcare provider category | 735,725         | 4        | ,000 |
| Gender                       | 238,768         | 1        | ,000 |

Dependent Variable: Any work absence due to ALL CAUSES occurred in the period - T2

Model: (Intercept), Healthcare provider category, Gender

## Parameter Estimates

| Parameter                        | B              | Std. Error | 95% Wald Confidence Interval |       | Hypothesis Test |    |      | Exp(B) | 95% Wald Confidence Interval for Exp(B) |       |
|----------------------------------|----------------|------------|------------------------------|-------|-----------------|----|------|--------|-----------------------------------------|-------|
|                                  |                |            | Lower                        | Upper | Wald Chi-Square | df | Sig. |        | Lower                                   | Upper |
| (Intercept)                      | -.640          | ,0292      | -.698                        | -.583 | 480,633         | 1  | ,000 | ,527   | ,498                                    | ,558  |
| [Healthcare provider category=5] | ,615           | ,0444      | ,528                         | ,702  | 191,633         | 1  | ,000 | 1,849  | 1,695                                   | 2,017 |
| [Healthcare provider category=4] | ,888           | ,0338      | ,822                         | ,955  | 689,944         | 1  | ,000 | 2,431  | 2,275                                   | 2,598 |
| [Healthcare provider category=3] | ,595           | ,0687      | ,461                         | ,730  | 75,153          | 1  | ,000 | 1,814  | 1,585                                   | 2,075 |
| [Healthcare provider category=2] | ,797           | ,0385      | ,722                         | ,873  | 428,315         | 1  | ,000 | 2,219  | 2,058                                   | 2,393 |
| [Healthcare provider category=1] | 0 <sup>a</sup> | .          | .                            | .     | .               | .  | .    | 1      | .                                       | .     |
| [Gender=1]                       | -.464          | ,0300      | -.523                        | -.405 | 238,768         | 1  | ,000 | ,629   | ,593                                    | ,667  |
| [Gender=0]                       | 0 <sup>a</sup> | .          | .                            | .     | .               | .  | .    | 1      | .                                       | .     |
| (Scale)                          | 1 <sup>b</sup> |            |                              |       |                 |    |      |        |                                         |       |

Dependent Variable: Any work absence due to ALL CAUSES occurred in the period - T2

Model: (Intercept), Healthcare provider category, Gender

a. Set to zero because this parameter is redundant.

b. Fixed at the displayed value.

\* Generalized Linear Models.

GENLIN AbAC\_T1 (REFERENCE=FIRST) BY HCPcateg Sex (ORDER=DESCENDING)

/MODEL HCPcateg Sex INTERCEPT=YES

DISTRIBUTION=BINOMIAL LINK=LOGIT

/CRITERIA METHOD=FISHER(1) SCALE=1 COVB=MODEL MAXITERATIONS=100 MAXSTEPHALVING=5

```

PCONVERGE=1E-006 (ABSOLUTE) SINGULAR=1E-012 ANALYSISTYPE=3 (WALD) CILEVEL=95 CITYPE=WALD
LIKELIHOOD=FULL
/MISSING CLASSMISSING=EXCLUDE
/PRINT CPS DESCRIPTIVES MODELINFO FIT SUMMARY SOLUTION (EXPONENTIATED) .
    
```

## Generalized Linear Models

### Model Information

|                          |                                                                                           |
|--------------------------|-------------------------------------------------------------------------------------------|
| Dependent Variable       | Any work absence due to ALL CAUSES occurred in the period - T1 (non-exposed) <sup>a</sup> |
| Probability Distribution | Binomial                                                                                  |
| Link Function            | Logit                                                                                     |

a. The procedure models Yes as the response, treating No as the reference category.

### Case Processing Summary

|          | N     | Percent |
|----------|-------|---------|
| Included | 26956 | 82,5%   |
| Excluded | 5735  | 17,5%   |

|       |       |        |
|-------|-------|--------|
| Total | 32691 | 100,0% |
|-------|-------|--------|

### Categorical Variable Information

|                    |                                                                              |                  | N      | Percent |
|--------------------|------------------------------------------------------------------------------|------------------|--------|---------|
| Dependent Variable | Any work absence due to ALL CAUSES occurred in the period - T1 (non-exposed) | No               | 12701  | 47,1%   |
|                    |                                                                              | Yes              | 14255  | 52,9%   |
|                    |                                                                              | Total            | 26956  | 100,0%  |
| Factor             | Healthcare provider category                                                 | Other HCP        | 3230   | 12,0%   |
|                    |                                                                              | Nurse assistants | 10266  | 38,1%   |
|                    |                                                                              | Physiotherapists | 1019   | 3,8%    |
|                    |                                                                              | Nurses           | 5570   | 20,7%   |
|                    |                                                                              | Physicians       | 6871   | 25,5%   |
|                    |                                                                              | Total            | 26956  | 100,0%  |
|                    | Gender                                                                       | Male             | 7108   | 26,4%   |
|                    |                                                                              | Female           | 19848  | 73,6%   |
| Total              |                                                                              | 26956            | 100,0% |         |

### Goodness of Fit<sup>a</sup>

|                    | Value  | df | Value/df |
|--------------------|--------|----|----------|
| Deviance           | 30,390 | 4  | 7,598    |
| Scaled Deviance    | 30,390 | 4  |          |
| Pearson Chi-Square | 30,337 | 4  | 7,584    |



|                                      |         |   |  |
|--------------------------------------|---------|---|--|
| Scaled Pearson Chi-Square            | 30,337  | 4 |  |
| Log Likelihood <sup>b</sup>          | -54,659 |   |  |
| Akaike's Information Criterion (AIC) | 121,317 |   |  |
| Finite Sample Corrected AIC (AICC)   | 121,320 |   |  |
| Bayesian Information Criterion (BIC) | 170,529 |   |  |
| Consistent AIC (CAIC)                | 176,529 |   |  |

Dependent Variable: Any work absence due to ALL CAUSES occurred in the period - T1

Model: (Intercept), Healthcare provider category, Gender<sup>a</sup>

- a. Information criteria are in smaller-is-better form.
- b. The full log likelihood function is displayed and used in computing information criteria.

**Omnibus Test<sup>a</sup>**

| Likelihood Ratio Chi-Square | df | Sig. |
|-----------------------------|----|------|
| 1167,675                    | 5  | ,000 |

Dependent Variable: Any work absence due to ALL CAUSES occurred in the period - T1

Model: (Intercept), Healthcare provider category, Gender<sup>a</sup>

a. Compares the fitted model against the intercept-only model.

**Tests of Model Effects**

| Source                       | Wald Chi-Square | Type III<br>df | Sig. |
|------------------------------|-----------------|----------------|------|
| (Intercept)                  | ,702            | 1              | ,402 |
| Healthcare provider category | 548,234         | 4              | ,000 |
| Gender                       | 316,542         | 1              | ,000 |

Dependent Variable: Any work absence due to ALL CAUSES occurred in the period - T1

Model: (Intercept), Healthcare provider category, Gender

## Parameter Estimates

| Parameter                        | B              | Std. Error | 95% Wald Confidence Interval |       | Hypothesis Test |    |      | Exp(B) | 95% Wald Confidence Interval for Exp(B) |       |
|----------------------------------|----------------|------------|------------------------------|-------|-----------------|----|------|--------|-----------------------------------------|-------|
|                                  |                |            | Lower                        | Upper | Wald Chi-Square | df | Sig. |        | Lower                                   | Upper |
| (Intercept)                      | -.261          | ,0280      | -.316                        | -.206 | 86,925          | 1  | ,000 | ,770   | ,729                                    | ,814  |
| [Healthcare provider category=5] | ,664           | ,0437      | ,579                         | ,750  | 230,812         | 1  | ,000 | 1,943  | 1,783                                   | 2,117 |
| [Healthcare provider category=4] | ,672           | ,0329      | ,607                         | ,736  | 416,761         | 1  | ,000 | 1,957  | 1,835                                   | 2,088 |
| [Healthcare provider category=3] | ,599           | ,0684      | ,465                         | ,733  | 76,711          | 1  | ,000 | 1,821  | 1,592                                   | 2,082 |
| [Healthcare provider category=2] | ,753           | ,0380      | ,678                         | ,827  | 393,161         | 1  | ,000 | 2,123  | 1,971                                   | 2,287 |
| [Healthcare provider category=1] | 0 <sup>a</sup> | .          | .                            | .     | .               | .  | .    | 1      | .                                       | .     |
| [Gender=1]                       | -.522          | ,0294      | -.580                        | -.465 | 316,542         | 1  | ,000 | ,593   | ,560                                    | ,628  |
| [Gender=0]                       | 0 <sup>a</sup> | .          | .                            | .     | .               | .  | .    | 1      | .                                       | .     |
| (Scale)                          | 1 <sup>b</sup> |            |                              |       |                 |    |      |        |                                         |       |

Dependent Variable: Any work absence due to ALL CAUSES occurred in the period - T1

Model: (Intercept), Healthcare provider category, Gender

a. Set to zero because this parameter is redundant.

b. Fixed at the displayed value.

\* Generalized Linear Models.

GENLIN AbHrel\_T2 (REFERENCE=FIRST) BY HCPcateg Sex (ORDER=DESCENDING)

/MODEL HCPcateg Sex INTERCEPT=YES

DISTRIBUTION=BINOMIAL LINK=LOGIT

/CRITERIA METHOD=FISHER(1) SCALE=1 COVB=MODEL MAXITERATIONS=100 MAXSTEPHALVING=5

PCONVERGE=1E-006 (ABSOLUTE) SINGULAR=1E-012 ANALYSISTYPE=3 (WALD) CILEVEL=95 CITYPE=WALD

LIKELIHOOD=FULL

/MISSING CLASSMISSING=EXCLUDE

/PRINT CPS DESCRIPTIVES MODELINFO FIT SUMMARY SOLUTION (EXPONENTIATED).

## Generalized Linear Models

### Model Information

|                          |                                                                                        |
|--------------------------|----------------------------------------------------------------------------------------|
| Dependent Variable       | Any work absence due to HEALTH-RELATED CAUSES occurred in the period - T2 <sup>a</sup> |
| Probability Distribution | Binomial                                                                               |
| Link Function            | Logit                                                                                  |

a. The procedure models Yes as the response, treating No as the reference category.

### Case Processing Summary

|          | N     | Percent |
|----------|-------|---------|
| Included | 26956 | 82,5%   |
| Excluded | 5735  | 17,5%   |
| Total    | 32691 | 100,0%  |

**Categorical Variable Information**

|                    |                                                                           |                  | N     | Percent |
|--------------------|---------------------------------------------------------------------------|------------------|-------|---------|
| Dependent Variable | Any work absence due to HEALTH-RELATED CAUSES occurred in the period - T2 | No               | 17011 | 63,1%   |
|                    |                                                                           | Yes              | 9945  | 36,9%   |
|                    |                                                                           | Total            | 26956 | 100,0%  |
| Factor             | Healthcare provider category                                              | Other HCP        | 3230  | 12,0%   |
|                    |                                                                           | Nurse assistants | 10266 | 38,1%   |
|                    |                                                                           | Physiotherapists | 1019  | 3,8%    |
|                    |                                                                           | Nurses           | 5570  | 20,7%   |
|                    |                                                                           | Physicians       | 6871  | 25,5%   |
|                    |                                                                           | Total            | 26956 | 100,0%  |
|                    | Gender                                                                    | Male             | 7108  | 26,4%   |
|                    |                                                                           | Female           | 19848 | 73,6%   |
|                    |                                                                           | Total            | 26956 | 100,0%  |

**Goodness of Fit<sup>a</sup>**

|                                      | Value   | df | Value/df |
|--------------------------------------|---------|----|----------|
| Deviance                             | 28,472  | 4  | 7,118    |
| Scaled Deviance                      | 28,472  | 4  |          |
| Pearson Chi-Square                   | 28,399  | 4  | 7,100    |
| Scaled Pearson Chi-Square            | 28,399  | 4  |          |
| Log Likelihood <sup>b</sup>          | -53,060 |    |          |
| Akaike's Information Criterion (AIC) | 118,121 |    |          |

|                                      |         |  |  |
|--------------------------------------|---------|--|--|
| Finite Sample Corrected AIC (AICC)   | 118,124 |  |  |
| Bayesian Information Criterion (BIC) | 167,333 |  |  |
| Consistent AIC (CAIC)                | 173,333 |  |  |

Dependent Variable: Any work absence due to HEALTH-RELATED CAUSES occurred in the period - T2

Model: (Intercept), Healthcare provider category, Gender<sup>a</sup>

- a. Information criteria are in smaller-is-better form.
- b. The full log likelihood function is displayed and used in computing information criteria.

**Omnibus Test<sup>a</sup>**

| Likelihood Ratio Chi-Square | df | Sig. |
|-----------------------------|----|------|
| 1367,899                    | 5  | ,000 |

Dependent Variable: Any work absence due to HEALTH-RELATED CAUSES occurred in the period - T2

Model: (Intercept), Healthcare provider category, Gender<sup>a</sup>

- a. Compares the fitted model against the intercept-only model.



Dependent Variable: Any work absence due to HEALTH-RELATED CAUSES occurred in the period - T2

Model: (Intercept), Healthcare provider category, Gender

a. Set to zero because this parameter is redundant.

b. Fixed at the displayed value.

\* Generalized Linear Models.

```

GENLIN AbHRel_T1 (REFERENCE=FIRST) BY HCPcateg Sex (ORDER=DESCENDING)
  /MODEL HCPcateg Sex INTERCEPT=YES
DISTRIBUTION=BINOMIAL LINK=LOGIT
  /CRITERIA METHOD=FISHER(1) SCALE=1 COVB=MODEL MAXITERATIONS=100 MAXSTEPHALVING=5
  PCONVERGE=1E-006 (ABSOLUTE) SINGULAR=1E-012 ANALYSISTYPE=3 (WALD) CILEVEL=95 CITYPE=WALD
  LIKELIHOOD=FULL
  /MISSING CLASSMISSING=EXCLUDE
  /PRINT CPS DESCRIPTIVES MODELINFO FIT SUMMARY SOLUTION (EXPONENTIATED).
    
```

## Generalized Linear Models

### Model Information

|                          |                                                                                        |
|--------------------------|----------------------------------------------------------------------------------------|
| Dependent Variable       | Any work absence due to HEALTH-RELATED CAUSES occurred in the period - T1 <sup>a</sup> |
| Probability Distribution | Binomial                                                                               |
| Link Function            | Logit                                                                                  |



a. The procedure models Yes as the response, treating No as the reference category.

### Case Processing Summary

|          | N     | Percent |
|----------|-------|---------|
| Included | 26956 | 82,5%   |
| Excluded | 5735  | 17,5%   |
| Total    | 32691 | 100,0%  |

### Categorical Variable Information

|                    |                                                                           |                  | N     | Percent |
|--------------------|---------------------------------------------------------------------------|------------------|-------|---------|
| Dependent Variable | Any work absence due to HEALTH-RELATED CAUSES occurred in the period - T1 | No               | 15577 | 57,8%   |
|                    |                                                                           | Yes              | 11379 | 42,2%   |
|                    |                                                                           | Total            | 26956 | 100,0%  |
| Factor             | Healthcare provider category                                              | Other HCP        | 3230  | 12,0%   |
|                    |                                                                           | Nurse assistants | 10266 | 38,1%   |
|                    |                                                                           | Physiotherapists | 1019  | 3,8%    |
|                    |                                                                           | Nurses           | 5570  | 20,7%   |
|                    |                                                                           | Physicians       | 6871  | 25,5%   |
|                    |                                                                           | Total            | 26956 | 100,0%  |
|                    | Gender                                                                    | Male             | 7108  | 26,4%   |
|                    | Female                                                                    | 19848            | 73,6% |         |

|       |       |        |
|-------|-------|--------|
| Total | 26956 | 100,0% |
|-------|-------|--------|

**Goodness of Fit<sup>a</sup>**

|                                      | Value   | df | Value/df |
|--------------------------------------|---------|----|----------|
| Deviance                             | 38,075  | 4  | 9,519    |
| Scaled Deviance                      | 38,075  | 4  |          |
| Pearson Chi-Square                   | 37,813  | 4  | 9,453    |
| Scaled Pearson Chi-Square            | 37,813  | 4  |          |
| Log Likelihood <sup>b</sup>          | -58,128 |    |          |
| Akaike's Information Criterion (AIC) | 128,255 |    |          |
| Finite Sample Corrected AIC (AICC)   | 128,259 |    |          |
| Bayesian Information Criterion (BIC) | 177,467 |    |          |
| Consistent AIC (CAIC)                | 183,467 |    |          |

Dependent Variable: Any work absence due to HEALTH-RELATED CAUSES occurred in the period - T1

Model: (Intercept), Healthcare provider category, Gender<sup>a</sup>

- a. Information criteria are in smaller-is-better form.
- b. The full log likelihood function is displayed and used in computing information criteria.

**Omnibus Test<sup>a</sup>**

| Likelihood Ratio Chi-Square | df | Sig. |
|-----------------------------|----|------|
| 1757,491                    | 5  | ,000 |

Dependent Variable: Any work absence due to HEALTH-RELATED CAUSES occurred in the period - T1

Model: (Intercept), Healthcare provider category, Gender<sup>a</sup>

a. Compares the fitted model against the intercept-only model.

**Tests of Model Effects**

| Source                       | Wald Chi-Square | Type III df | Sig. |
|------------------------------|-----------------|-------------|------|
| (Intercept)                  | 642,068         | 1           | ,000 |
| Healthcare provider category | 884,279         | 4           | ,000 |
| Gender                       | 380,554         | 1           | ,000 |

Dependent Variable: Any work absence due to HEALTH-RELATED CAUSES occurred in the period - T1

Model: (Intercept), Healthcare provider category, Gender

### Parameter Estimates

| Parameter                        | B              | Std. Error | 95% Wald Confidence Interval |       | Hypothesis Test |    |      | 95% Wald Confidence Interval for Exp(B) |       |       |
|----------------------------------|----------------|------------|------------------------------|-------|-----------------|----|------|-----------------------------------------|-------|-------|
|                                  |                |            | Lower                        | Upper | Wald Chi-Square | df | Sig. | Exp(B)                                  | Lower | Upper |
| (Intercept)                      | -.901          | ,0309      | -.961                        | -.840 | 850,653         | 1  | ,000 | ,406                                    | ,382  | ,432  |
| [Healthcare provider category=5] | ,847           | ,0458      | ,758                         | ,937  | 341,840         | 1  | ,000 | 2,333                                   | 2,133 | 2,553 |
| [Healthcare provider category=4] | ,993           | ,0354      | ,924                         | 1,062 | 788,082         | 1  | ,000 | 2,699                                   | 2,518 | 2,893 |
| [Healthcare provider category=3] | ,818           | ,0698      | ,682                         | ,955  | 137,461         | 1  | ,000 | 2,267                                   | 1,977 | 2,600 |
| [Healthcare provider category=2] | ,978           | ,0399      | ,900                         | 1,056 | 601,225         | 1  | ,000 | 2,660                                   | 2,460 | 2,876 |
| [Healthcare provider category=1] | 0 <sup>a</sup> | .          | .                            | .     | .               | .  | .    | 1                                       | .     | .     |
| [Gender=1]                       | -.610          | ,0313      | -.672                        | -.549 | 380,554         | 1  | ,000 | ,543                                    | ,511  | ,578  |
| [Gender=0]                       | 0 <sup>a</sup> | .          | .                            | .     | .               | .  | .    | 1                                       | .     | .     |
| (Scale)                          | 1 <sup>b</sup> |            |                              |       |                 |    |      |                                         |       |       |

Dependent Variable: Any work absence due to HEALTH-RELATED CAUSES occurred in the period - T1

Model: (Intercept), Healthcare provider category, Gender

a. Set to zero because this parameter is redundant.

b. Fixed at the displayed value.

\* Generalized Linear Models.

GENLIN AbMnt\_T2 (REFERENCE=FIRST) BY HCPcateg Sex (ORDER=DESCENDING)

/MODEL HCPcateg Sex INTERCEPT=YES

DISTRIBUTION=BINOMIAL LINK=LOGIT

/CRITERIA METHOD=FISHER(1) SCALE=1 COVB=MODEL MAXITERATIONS=100 MAXSTEPHALVING=5

PCONVERGE=1E-006 (ABSOLUTE) SINGULAR=1E-012 ANALYSISTYPE=3 (WALD) CILEVEL=95 CITYPE=WALD

LIKELIHOOD=FULL

/MISSING CLASSMISSING=EXCLUDE

/PRINT CPS DESCRIPTIVES MODELINFO FIT SUMMARY SOLUTION (EXPONENTIATED).

## Generalized Linear Models

### Model Information

|                          |                                                                                 |
|--------------------------|---------------------------------------------------------------------------------|
| Dependent Variable       | Any work absence due to MENTAL DISEASE occurred in the period - T2 <sup>a</sup> |
| Probability Distribution | Binomial                                                                        |
| Link Function            | Logit                                                                           |

a. The procedure models Yes as the response, treating No as the reference category.

### Case Processing Summary

|          | N     | Percent |
|----------|-------|---------|
| Included | 26956 | 82,5%   |
| Excluded | 5735  | 17,5%   |
| Total    | 32691 | 100,0%  |

### Categorical Variable Information

| N | Percent |
|---|---------|
|---|---------|

|                    |                                                                    |                  |       |        |
|--------------------|--------------------------------------------------------------------|------------------|-------|--------|
| Dependent Variable | Any work absence due to MENTAL DISEASE occurred in the period - T2 | No               | 25973 | 96,4%  |
|                    |                                                                    | Yes              | 983   | 3,6%   |
|                    |                                                                    | Total            | 26956 | 100,0% |
| Factor             | Healthcare provider category                                       | Other HCP        | 3230  | 12,0%  |
|                    |                                                                    | Nurse assistants | 10266 | 38,1%  |
|                    |                                                                    | Physiotherapists | 1019  | 3,8%   |
|                    |                                                                    | Nurses           | 5570  | 20,7%  |
|                    |                                                                    | Physicians       | 6871  | 25,5%  |
|                    |                                                                    | Total            | 26956 | 100,0% |
|                    | Gender                                                             | Male             | 7108  | 26,4%  |
|                    |                                                                    | Female           | 19848 | 73,6%  |
|                    |                                                                    | Total            | 26956 | 100,0% |

**Goodness of Fit<sup>a</sup>**

|                                      | Value   | df | Value/df |
|--------------------------------------|---------|----|----------|
| Deviance                             | 20,615  | 4  | 5,154    |
| Scaled Deviance                      | 20,615  | 4  |          |
| Pearson Chi-Square                   | 17,639  | 4  | 4,410    |
| Scaled Pearson Chi-Square            | 17,639  | 4  |          |
| Log Likelihood <sup>b</sup>          | -38,556 |    |          |
| Akaike's Information Criterion (AIC) | 89,111  |    |          |
| Finite Sample Corrected AIC (AICC)   | 89,115  |    |          |

|                                      |         |  |  |
|--------------------------------------|---------|--|--|
| Bayesian Information Criterion (BIC) | 138,323 |  |  |
| Consistent AIC (CAIC)                | 144,323 |  |  |

Dependent Variable: Any work absence due to MENTAL DISEASE occurred in the period - T2

Model: (Intercept), Healthcare provider category, Gender<sup>a</sup>

- a. Information criteria are in smaller-is-better form.
- b. The full log likelihood function is displayed and used in computing information criteria.

### Omnibus Test<sup>a</sup>

| Likelihood Ratio Chi-Square | df | Sig. |
|-----------------------------|----|------|
| 172,312                     | 5  | ,000 |

Dependent Variable: Any work absence due to MENTAL DISEASE occurred in the period - T2

Model: (Intercept), Healthcare provider category, Gender<sup>a</sup>

- a. Compares the fitted model against the intercept-only model.

### Tests of Model Effects

Source

Type III

Supporting Information Part 4

|                              | Wald Chi-Square | df | Sig. |
|------------------------------|-----------------|----|------|
| (Intercept)                  | 4293,340        | 1  | ,000 |
| Healthcare provider category | 72,671          | 4  | ,000 |
| Gender                       | 39,851          | 1  | ,000 |

Dependent Variable: Any work absence due to MENTAL DISEASE occurred in the period - T2

Model: (Intercept), Healthcare provider category, Gender

**Parameter Estimates**

| Parameter                        | B              | Std. Error | 95% Wald Confidence Interval |        | Hypothesis Test |    |      | Exp(B) | 95% Wald Confidence Interval for Exp(B) |       |
|----------------------------------|----------------|------------|------------------------------|--------|-----------------|----|------|--------|-----------------------------------------|-------|
|                                  |                |            | Lower                        | Upper  | Wald Chi-Square | df | Sig. |        | Lower                                   | Upper |
| (Intercept)                      | -3,850         | ,0993      | -4,045                       | -3,656 | 1503,719        | 1  | ,000 | ,021   | ,018                                    | ,026  |
| [Healthcare provider category=5] | ,784           | ,1321      | ,525                         | 1,043  | 35,182          | 1  | ,000 | 2,189  | 1,690                                   | 2,836 |
| [Healthcare provider category=4] | ,803           | ,1085      | ,590                         | 1,015  | 54,755          | 1  | ,000 | 2,232  | 1,804                                   | 2,760 |
| [Healthcare provider category=3] | ,907           | ,1790      | ,556                         | 1,258  | 25,699          | 1  | ,000 | 2,477  | 1,744                                   | 3,518 |
| [Healthcare provider category=2] | ,948           | ,1152      | ,722                         | 1,174  | 67,646          | 1  | ,000 | 2,580  | 2,059                                   | 3,234 |
| [Healthcare provider category=1] | 0 <sup>a</sup> | .          | .                            | .      | .               | .  | .    | 1      | .                                       | .     |
| [Gender=1]                       | -,595          | ,0943      | -,780                        | -,410  | 39,851          | 1  | ,000 | ,552   | ,459                                    | ,663  |
| [Gender=0]                       | 0 <sup>a</sup> | .          | .                            | .      | .               | .  | .    | 1      | .                                       | .     |
| (Scale)                          | 1 <sup>b</sup> |            |                              |        |                 |    |      |        |                                         |       |

Dependent Variable: Any work absence due to MENTAL DISEASE occurred in the period - T2

Model: (Intercept), Healthcare provider category, Gender

a. Set to zero because this parameter is redundant.

b. Fixed at the displayed value.



```
* Generalized Linear Models.
GENLIN AbMnt_T1 (REFERENCE=FIRST) BY HCPcateg Sex (ORDER=DESCENDING)
  /MODEL HCPcateg Sex INTERCEPT=YES
  DISTRIBUTION=BINOMIAL LINK=LOGIT
  /CRITERIA METHOD=FISHER(1) SCALE=1 COVB=MODEL MAXITERATIONS=100 MAXSTEPHALVING=5
    PCONVERGE=1E-006 (ABSOLUTE) SINGULAR=1E-012 ANALYSISTYPE=3 (WALD) CILEVEL=95 CITYPE=WALD
    LIKELIHOOD=FULL
  /MISSING CLASSMISSING=EXCLUDE
  /PRINT CPS DESCRIPTIVES MODELINFO FIT SUMMARY SOLUTION (EXPONENTIATED).
```

## Generalized Linear Models

### Model Information

|                          |                                                                                       |
|--------------------------|---------------------------------------------------------------------------------------|
| Dependent Variable       | Any work absence due to<br>MENTAL DISEASE occurred in<br>the period - T1 <sup>a</sup> |
| Probability Distribution | Binomial                                                                              |
| Link Function            | Logit                                                                                 |

a. The procedure models Yes as the response, treating No as the reference category.

### Case Processing Summary

|          | N     | Percent |
|----------|-------|---------|
| Included | 26956 | 82,5%   |
| Excluded | 5735  | 17,5%   |
| Total    | 32691 | 100,0%  |

### Categorical Variable Information

|                    |                                                                    |                  | N      | Percent |
|--------------------|--------------------------------------------------------------------|------------------|--------|---------|
| Dependent Variable | Any work absence due to MENTAL DISEASE occurred in the period - T1 | No               | 26271  | 97,5%   |
|                    |                                                                    | Yes              | 685    | 2,5%    |
|                    |                                                                    | Total            | 26956  | 100,0%  |
| Factor             | Healthcare provider category                                       | Other HCP        | 3230   | 12,0%   |
|                    |                                                                    | Nurse assistants | 10266  | 38,1%   |
|                    |                                                                    | Physiotherapists | 1019   | 3,8%    |
|                    |                                                                    | Nurses           | 5570   | 20,7%   |
|                    |                                                                    | Physicians       | 6871   | 25,5%   |
|                    |                                                                    | Total            | 26956  | 100,0%  |
|                    | Gender                                                             | Male             | 7108   | 26,4%   |
|                    |                                                                    | Female           | 19848  | 73,6%   |
|                    | Total                                                              | 26956            | 100,0% |         |

**Goodness of Fit<sup>a</sup>**

|                                      | Value   | df | Value/df |
|--------------------------------------|---------|----|----------|
| Deviance                             | 5,169   | 4  | 1,292    |
| Scaled Deviance                      | 5,169   | 4  |          |
| Pearson Chi-Square                   | 5,009   | 4  | 1,252    |
| Scaled Pearson Chi-Square            | 5,009   | 4  |          |
| Log Likelihood <sup>b</sup>          | -29,525 |    |          |
| Akaike's Information Criterion (AIC) | 71,050  |    |          |
| Finite Sample Corrected AIC (AICC)   | 71,053  |    |          |
| Bayesian Information Criterion (BIC) | 120,262 |    |          |
| Consistent AIC (CAIC)                | 126,262 |    |          |

Dependent Variable: Any work absence due to MENTAL DISEASE occurred in the period - T1

Model: (Intercept), Healthcare provider category, Gender<sup>a</sup>

- a. Information criteria are in smaller-is-better form.
- b. The full log likelihood function is displayed and used in computing information criteria.

**Omnibus Test<sup>a</sup>**

| Likelihood Ratio Chi-Square | df | Sig. |
|-----------------------------|----|------|
| 167,372                     | 5  | ,000 |

Dependent Variable: Any work absence due to MENTAL DISEASE occurred in the period - T1

Model: (Intercept), Healthcare provider category, Gender<sup>a</sup>

a. Compares the fitted model against the intercept-only model.

**Tests of Model Effects**

| Source                       | Wald Chi-Square | Type III<br>df | Sig. |
|------------------------------|-----------------|----------------|------|
| (Intercept)                  | 3611,196        | 1              | ,000 |
| Healthcare provider category | 79,056          | 4              | ,000 |
| Gender                       | 22,429          | 1              | ,000 |

Dependent Variable: Any work absence due to MENTAL DISEASE occurred in the period - T1

Model: (Intercept), Healthcare provider category, Gender

### Parameter Estimates

| Parameter                        | B              | Std. Error | 95% Wald Confidence Interval |        | Hypothesis Test |    |      | Exp(B) | 95% Wald Confidence Interval for Exp(B) |       |
|----------------------------------|----------------|------------|------------------------------|--------|-----------------|----|------|--------|-----------------------------------------|-------|
|                                  |                |            | Lower                        | Upper  | Wald Chi-Square | df | Sig. |        | Lower                                   | Upper |
| (Intercept)                      | -4,572         | ,1383      | -4,843                       | -4,301 | 1093,428        | 1  | ,000 | ,010   | ,008                                    | ,014  |
| [Healthcare provider category=5] | 1,027          | ,1757      | ,683                         | 1,371  | 34,160          | 1  | ,000 | 2,792  | 1,979                                   | 3,940 |
| [Healthcare provider category=4] | 1,245          | ,1464      | ,958                         | 1,532  | 72,324          | 1  | ,000 | 3,474  | 2,607                                   | 4,629 |
| [Healthcare provider category=3] | 1,210          | ,2268      | ,765                         | 1,654  | 28,457          | 1  | ,000 | 3,353  | 2,150                                   | 5,230 |
| [Healthcare provider category=2] | 1,286          | ,1546      | ,983                         | 1,589  | 69,221          | 1  | ,000 | 3,619  | 2,673                                   | 4,900 |
| [Healthcare provider category=1] | 0 <sup>a</sup> | .          | .                            | .      | .               | .  | .    | 1      | .                                       | .     |
| [Gender=1]                       | -,534          | ,1128      | -,755                        | -,313  | 22,429          | 1  | ,000 | ,586   | ,470                                    | ,731  |
| [Gender=0]                       | 0 <sup>a</sup> | .          | .                            | .      | .               | .  | .    | 1      | .                                       | .     |
| (Scale)                          | 1 <sup>b</sup> |            |                              |        |                 |    |      |        |                                         |       |

Dependent Variable: Any work absence due to MENTAL DISEASE occurred in the period - T1

Model: (Intercept), Healthcare provider category, Gender

a. Set to zero because this parameter is redundant.

b. Fixed at the displayed value.

Are the apparent differences observed across the periods of pre-pandemia (2019) and pandemic (2020) regarding the proportions of individuals presenting different types of work absences still significant taking into consideration the observed differences among professional categories and gender?

\* Generalized Estimating Equations.

GENLIN AbAC (REFERENCE=FIRST) BY AsgnGrp HCPcateg Sex (ORDER=DESCENDING)

/MODEL AsgnGrp HCPcateg Sex INTERCEPT=YES

DISTRIBUTION=BINOMIAL LINK=LOGIT

/CRITERIA METHOD=FISHER(1) SCALE=1 MAXITERATIONS=100 MAXSTEPHALVING=5 PCONVERGE=1E-006 (ABSOLUTE)

```

SINGULAR=1E-012 ANALYSISTYPE=3(WALD) CILEVEL=95 LIKELIHOOD=FULL
/REPEATED SUBJECT=ID WITHINSUBJECT=AsgnGrp SORT=YES CORRTYPE=UNSTRUCTURED ADJUSTCORR=YES
COVB=ROBUST MAXITERATIONS=100 PCONVERGE=1e-006 (ABSOLUTE) UPDATECORR=1
/MISSING CLASSMISSING=EXCLUDE
/PRINT CPS DESCRIPTIVES MODELINFO FIT SUMMARY SOLUTION (EXPONENTIATED) .
    
```

## Generalized Linear Models

### Model Information

|                                      |   |                                                                        |
|--------------------------------------|---|------------------------------------------------------------------------|
| Dependent Variable                   |   | Any work absence due to ALL CAUSES occurred in the period <sup>a</sup> |
| Probability Distribution             |   | Binomial                                                               |
| Link Function                        |   | Logit                                                                  |
| Subject Effect                       | 1 | ID                                                                     |
| Within-Subject Effect                | 1 | Exposure to the pandemia environment                                   |
| Working Correlation Matrix Structure |   | Unstructured                                                           |

a. The procedure models Yes as the response, treating No as the reference category.

### Case Processing Summary

|  | N | Percent |
|--|---|---------|
|--|---|---------|

Supporting Information Part 4

|          |       |        |
|----------|-------|--------|
| Included | 53912 | 82,5%  |
| Excluded | 11470 | 17,5%  |
| Total    | 65382 | 100,0% |

**Correlated Data Summary**

|                                    |                       |                                      |       |
|------------------------------------|-----------------------|--------------------------------------|-------|
| Number of Levels                   | Subject Effect        | ID                                   | 26956 |
|                                    | Within-Subject Effect | Exposure to the pandemia environment | 2     |
| Number of Subjects                 |                       |                                      | 26956 |
| Number of Measurements per Subject | Minimum               |                                      | 2     |
|                                    | Maximum               |                                      | 2     |
| Correlation Matrix Dimension       |                       |                                      | 2     |

**Categorical Variable Information**

|                    |                                                           |                    | N     | Percent |
|--------------------|-----------------------------------------------------------|--------------------|-------|---------|
| Dependent Variable | Any work absence due to ALL CAUSES occurred in the period | No                 | 27181 | 50,4%   |
|                    |                                                           | Yes                | 26731 | 49,6%   |
|                    |                                                           | Total              | 53912 | 100,0%  |
| Factor             | Exposure to the pandemia environment                      | Exposed (2020)     | 26956 | 50,0%   |
|                    |                                                           | Non-Exposed (2019) | 26956 | 50,0%   |
|                    |                                                           | Total              | 53912 | 100,0%  |
|                    | Healthcare provider category                              | Other HCP          | 6460  | 12,0%   |

|        |                  |       |        |
|--------|------------------|-------|--------|
|        | Nurse assistants | 20532 | 38,1%  |
|        | Physiotherapists | 2038  | 3,8%   |
|        | Nurses           | 11140 | 20,7%  |
|        | Physicians       | 13742 | 25,5%  |
|        | Total            | 53912 | 100,0% |
| Gender | Male             | 14216 | 26,4%  |
|        | Female           | 39696 | 73,6%  |
|        | Total            | 53912 | 100,0% |

**Goodness of Fit<sup>a</sup>**

|                                                                                   | Value     |
|-----------------------------------------------------------------------------------|-----------|
| Quasi Likelihood under Independence Model Criterion (QIC) <sup>b</sup>            | 72063,421 |
| Corrected Quasi Likelihood under Independence Model Criterion (QICC) <sup>b</sup> | 72061,646 |

Dependent Variable: Any work absence due to ALL CAUSES occurred in the period

Model: (Intercept), Exposure to the pandemia environment, Healthcare provider category, Gender<sup>a</sup>

a. Information criteria are in smaller-is-better form.

b. Computed using the full log quasi-likelihood function.



**Tests of Model Effects**

| Source                               | Wald Chi-Square | Type III<br>df | Sig. |
|--------------------------------------|-----------------|----------------|------|
| (Intercept)                          | 99,058          | 1              | ,000 |
| Exposure to the pandemia environment | 301,494         | 1              | ,000 |
| Healthcare provider category         | 1078,491        | 4              | ,000 |
| Gender                               | 468,751         | 1              | ,000 |

Dependent Variable: Any work absence due to ALL CAUSES occurred in the period

Model: (Intercept), Exposure to the pandemia environment, Healthcare provider category, Gender

**Parameter Estimates**

| Parameter                                | B              | Std. Error | 95% Wald Confidence Interval |       | Hypothesis Test |    |      | Exp(B) | 95% Wald Confidence Interval for Exp(B) |       |
|------------------------------------------|----------------|------------|------------------------------|-------|-----------------|----|------|--------|-----------------------------------------|-------|
|                                          |                |            | Lower                        | Upper | Wald Chi-Square | df | Sig. |        | Lower                                   | Upper |
| (Intercept)                              | -,310          | ,0231      | -,355                        | -,265 | 181,102         | 1  | ,000 | ,733   | ,701                                    | ,767  |
| [Exposure to the pandemia environment=1] | -,277          | ,0159      | -,308                        | -,246 | 301,494         | 1  | ,000 | ,758   | ,735                                    | ,782  |
| [Exposure to the pandemia environment=0] | 0 <sup>a</sup> | .          | .                            | .     | .               | .  | .    | 1      | .                                       | .     |
| [Healthcare provider category=5]         | ,637           | ,0334      | ,571                         | ,702  | 364,013         | 1  | ,000 | 1,890  | 1,771                                   | 2,018 |

Supporting Information Part 4

|                                  |                |       |       |       |         |   |      |       |       |       |
|----------------------------------|----------------|-------|-------|-------|---------|---|------|-------|-------|-------|
| [Healthcare provider category=4] | ,779           | ,0255 | ,729  | ,829  | 931,393 | 1 | ,000 | 2,179 | 2,073 | 2,291 |
| [Healthcare provider category=3] | ,595           | ,0524 | ,492  | ,698  | 128,992 | 1 | ,000 | 1,813 | 1,636 | 2,009 |
| [Healthcare provider category=2] | ,772           | ,0292 | ,715  | ,829  | 697,433 | 1 | ,000 | 2,164 | 2,044 | 2,292 |
| [Healthcare provider category=1] | 0 <sup>a</sup> | .     | .     | .     | .       | . | .    | 1     | .     | .     |
| [Gender=1]                       | -,493          | ,0228 | -,538 | -,449 | 468,751 | 1 | ,000 | ,611  | ,584  | ,638  |
| [Gender=0]                       | 0 <sup>a</sup> | .     | .     | .     | .       | . | .    | 1     | .     | .     |
| (Scale)                          | 1              |       |       |       |         |   |      |       |       |       |

Dependent Variable: Any work absence due to ALL CAUSES occurred in the period

Model: (Intercept), Exposure to the pandemic environment, Healthcare provider category, Gender

a. Set to zero because this parameter is redundant.

## Generalized Linear Models

### Model Information

|                          |                                                                                   |
|--------------------------|-----------------------------------------------------------------------------------|
| Dependent Variable       | Any work absence due to HEALTH-RELATED CAUSES occurred in the period <sup>a</sup> |
| Probability Distribution | Binomial                                                                          |
| Link Function            | Logit                                                                             |
| Subject Effect           | 1 ID                                                                              |

|                                      |   |                                      |
|--------------------------------------|---|--------------------------------------|
| Within-Subject Effect                | 1 | Exposure to the pandemia environment |
| Working Correlation Matrix Structure |   | Unstructured                         |

a. The procedure models Yes as the response, treating No as the reference category.

\* Generalized Estimating Equations.

GENLIN AbHrel (REFERENCE=FIRST) BY AsgnGrp HCPcateg Sex (ORDER=DESCENDING)

/MODEL AsgnGrp HCPcateg Sex INTERCEPT=YES

DISTRIBUTION=BINOMIAL LINK=LOGIT

/CRITERIA METHOD=FISHER(1) SCALE=1 MAXITERATIONS=100 MAXSTEPHALVING=5 PCONVERGE=1E-006 (ABSOLUTE)

SINGULAR=1E-012 ANALYSISTYPE=3 (WALD) CILEVEL=95 LIKELIHOOD=FULL

/REPEATED SUBJECT=ID WITHINSUBJECT=AsgnGrp SORT=YES CORRTYPE=UNSTRUCTURED ADJUSTCORR=YES

COVB=ROBUST MAXITERATIONS=100 PCONVERGE=1e-006 (ABSOLUTE) UPDATECORR=1

/MISSING CLASSMISSING=EXCLUDE

/PRINT CPS DESCRIPTIVES MODELINFO FIT SUMMARY SOLUTION (EXPONENTIATED).

### Case Processing Summary

|          | N     | Percent |
|----------|-------|---------|
| Included | 53912 | 82,5%   |
| Excluded | 11470 | 17,5%   |
| Total    | 65382 | 100,0%  |

### Correlated Data Summary

|                  |                |    |       |
|------------------|----------------|----|-------|
| Number of Levels | Subject Effect | ID | 26956 |
|------------------|----------------|----|-------|

|                                    |                       |                                      |       |
|------------------------------------|-----------------------|--------------------------------------|-------|
|                                    | Within-Subject Effect | Exposure to the pandemia environment | 2     |
| Number of Subjects                 |                       |                                      | 26956 |
| Number of Measurements per Subject | Minimum               |                                      | 2     |
|                                    | Maximum               |                                      | 2     |
| Correlation Matrix Dimension       |                       |                                      | 2     |

### Categorical Variable Information

|                    |                                                                      |                    | N     | Percent |
|--------------------|----------------------------------------------------------------------|--------------------|-------|---------|
| Dependent Variable | Any work absence due to HEALTH-RELATED CAUSES occurred in the period | No                 | 32588 | 60,4%   |
|                    |                                                                      | Yes                | 21324 | 39,6%   |
|                    |                                                                      | Total              | 53912 | 100,0%  |
| Factor             | Exposure to the pandemia environment                                 | Exposed (2020)     | 26956 | 50,0%   |
|                    |                                                                      | Non-Exposed (2019) | 26956 | 50,0%   |
|                    |                                                                      | Total              | 53912 | 100,0%  |
|                    | Healthcare provider category                                         | Other HCP          | 6460  | 12,0%   |
|                    |                                                                      | Nurse assistants   | 20532 | 38,1%   |
|                    |                                                                      | Physiotherapists   | 2038  | 3,8%    |
|                    |                                                                      | Nurses             | 11140 | 20,7%   |
| Physicians         |                                                                      | 13742              | 25,5% |         |
| Total              | 53912                                                                | 100,0%             |       |         |
| Gender             | Male                                                                 | 14216              | 26,4% |         |
|                    | Female                                                               | 39696              | 73,6% |         |

|       |       |        |
|-------|-------|--------|
| Total | 53912 | 100,0% |
|-------|-------|--------|

**Goodness of Fit<sup>a</sup>**

|                                                                                   | Value     |
|-----------------------------------------------------------------------------------|-----------|
| Quasi Likelihood under Independence Model Criterion (QIC) <sup>b</sup>            | 69123,422 |
| Corrected Quasi Likelihood under Independence Model Criterion (QICC) <sup>b</sup> | 69121,573 |

Dependent Variable: Any work absence due to HEALTH-RELATED CAUSES occurred in the period

Model: (Intercept), Exposure to the pandemia environment, Healthcare provider category, Gender<sup>a</sup>

a. Information criteria are in smaller-is-better form.

b. Computed using the full log quasi-likelihood function.

**Tests of Model Effects**

| Source      | Wald Chi-Square | Type III df | Sig. |
|-------------|-----------------|-------------|------|
| (Intercept) | 1676,559        | 1           | ,000 |

Supporting Information Part 4

|                                      |          |   |      |
|--------------------------------------|----------|---|------|
| Exposure to the pandemia environment | 209,671  | 1 | ,000 |
| Healthcare provider category         | 1372,876 | 4 | ,000 |
| Gender                               | 508,863  | 1 | ,000 |

Dependent Variable: Any work absence due to HEALTH-RELATED CAUSES occurred in the period

Model: (Intercept), Exposure to the pandemia environment, Healthcare provider category, Gender

**Parameter Estimates**

| Parameter                                | B              | Std. Error | 95% Wald Confidence Interval |       | Hypothesis Test |    |      | Exp(B) | 95% Wald Confidence Interval for |       |
|------------------------------------------|----------------|------------|------------------------------|-------|-----------------|----|------|--------|----------------------------------|-------|
|                                          |                |            | Lower                        | Upper | Wald Chi-Square | df | Sig. |        | Lower                            | Upper |
| (Intercept)                              | -.882          | ,0253      | -.932                        | -.833 | 1213,556        | 1  | ,000 | ,414   | ,394                             | ,435  |
| [Exposure to the pandemia environment=1] | -.236          | ,0163      | -.267                        | -.204 | 209,671         | 1  | ,000 | ,790   | ,765                             | ,816  |
| [Exposure to the pandemia environment=0] | 0 <sup>a</sup> | .          | .                            | .     | .               | .  | .    | 1      | .                                | .     |
| [Healthcare provider category=5]         | ,745           | ,0356      | ,675                         | ,814  | 438,316         | 1  | ,000 | 2,106  | 1,964                            | 2,258 |
| [Healthcare provider category=4]         | ,987           | ,0277      | ,933                         | 1,041 | 1270,416        | 1  | ,000 | 2,684  | 2,542                            | 2,833 |
| [Healthcare provider category=3]         | ,732           | ,0542      | ,626                         | ,838  | 182,236         | 1  | ,000 | 2,080  | 1,870                            | 2,313 |
| [Healthcare provider category=2]         | ,921           | ,0310      | ,860                         | ,982  | 882,148         | 1  | ,000 | 2,512  | 2,364                            | 2,669 |
| [Healthcare provider category=1]         | 0 <sup>a</sup> | .          | .                            | .     | .               | .  | .    | 1      | .                                | .     |
| [Gender=1]                               | -.554          | ,0245      | -.602                        | -.505 | 508,863         | 1  | ,000 | ,575   | ,548                             | ,603  |

Supporting Information Part 4

|            |                |   |   |   |   |   |   |   |   |   |
|------------|----------------|---|---|---|---|---|---|---|---|---|
| [Gender=0] | 0 <sup>a</sup> | . | . | . | . | . | . | 1 | . | . |
| (Scale)    | 1              |   |   |   |   |   |   |   |   |   |

Dependent Variable: Any work absence due to HEALTH-RELATED CAUSES occurred in the period

Model: (Intercept), Exposure to the pandemia environment, Healthcare provider category, Gender

a. Set to zero because this parameter is redundant.

\* Generalized Estimating Equations.

```

GENLIN AbMnt (REFERENCE=FIRST) BY AsgnGrp HCPcateg Sex (ORDER=DESCENDING)
  /MODEL AsgnGrp HCPcateg Sex INTERCEPT=YES
DISTRIBUTION=BINOMIAL LINK=LOGIT
  /CRITERIA METHOD=FISHER(1) SCALE=1 MAXITERATIONS=100 MAXSTEPHALVING=5 PCONVERGE=1E-006 (ABSOLUTE)
  SINGULAR=1E-012 ANALYSISTYPE=3 (WALD) CILEVEL=95 LIKELIHOOD=FULL
  /REPEATED SUBJECT=ID WITHINSUBJECT=AsgnGrp SORT=YES CORRTYPE=UNSTRUCTURED ADJUSTCORR=YES
  COVB=ROBUST MAXITERATIONS=100 PCONVERGE=1e-006 (ABSOLUTE) UPDATECORR=1
  /MISSING CLASSMISSING=EXCLUDE
  /PRINT CPS DESCRIPTIVES MODELINFO FIT SUMMARY SOLUTION (EXPONENTIATED).
    
```

Supporting Information. Continues in the next file.
