# Supplementary material for: Impact of COVID-19 on the mental health of public university hospital workers in Brazil: A cohort-based analysis of 32,691 workers
Source: PubMed Central journal article supplement (PMC9202958; doi:10.1371/journal.pone.0269318), 2022-06-16
Supplement: pone.0269318.s005.pdf [file pone.0269318.s005.pdf]

## Generalized Linear Models

### Model Information

|                                      |                                                                            |                                      |
|--------------------------------------|----------------------------------------------------------------------------|--------------------------------------|
| Dependent Variable                   | Any work absence due to MENTAL DISEASE occurred in the period <sup>a</sup> |                                      |
| Probability Distribution             | Binomial                                                                   |                                      |
| Link Function                        | Logit                                                                      |                                      |
| Subject Effect                       | 1                                                                          | ID                                   |
| Within-Subject Effect                | 1                                                                          | Exposure to the pandemia environment |
| Working Correlation Matrix Structure | Unstructured                                                               |                                      |

a. The procedure models Yes as the response, treating No as the reference category.

### Case Processing Summary

|          | N     | Percent |
|----------|-------|---------|
| Included | 53912 | 82,5%   |
| Excluded | 11470 | 17,5%   |
| Total    | 65382 | 100,0%  |

### Correlated Data Summary

|                    |                       |                                      |       |
|--------------------|-----------------------|--------------------------------------|-------|
| Number of Levels   | Subject Effect        | ID                                   | 26956 |
|                    | Within-Subject Effect | Exposure to the pandemia environment | 2     |
| Number of Subjects |                       |                                      | 26956 |

|                                    |         |   |
|------------------------------------|---------|---|
| Number of Measurements per Subject | Minimum | 2 |
|                                    | Maximum | 2 |
| Correlation Matrix Dimension       |         | 2 |

### Categorical Variable Information

|                    |                                                               |                    | N      | Percent |
|--------------------|---------------------------------------------------------------|--------------------|--------|---------|
| Dependent Variable | Any work absence due to MENTAL DISEASE occurred in the period | No                 | 52244  | 96,9%   |
|                    |                                                               | Yes                | 1668   | 3,1%    |
|                    |                                                               | Total              | 53912  | 100,0%  |
| Factor             | Exposure to the pandemia environment                          | Exposed (2020)     | 26956  | 50,0%   |
|                    |                                                               | Non-Exposed (2019) | 26956  | 50,0%   |
|                    |                                                               | Total              | 53912  | 100,0%  |
|                    | Healthcare provider category                                  | Other HCP          | 6460   | 12,0%   |
|                    |                                                               | Nurse assistants   | 20532  | 38,1%   |
|                    |                                                               | Physiotherapists   | 2038   | 3,8%    |
|                    |                                                               | Nurses             | 11140  | 20,7%   |
|                    |                                                               | Physicians         | 13742  | 25,5%   |
|                    |                                                               | Total              | 53912  | 100,0%  |
|                    | Gender                                                        | Male               | 14216  | 26,4%   |
| Female             |                                                               | 39696              | 73,6%  |         |
| Total              |                                                               | 53912              | 100,0% |         |

### Goodness of Fit<sup>a</sup>

|                                                                        | Value     |
|------------------------------------------------------------------------|-----------|
| Quasi Likelihood under Independence Model Criterion (QIC) <sup>b</sup> | 14506,229 |

|                                                                                   |           |
|-----------------------------------------------------------------------------------|-----------|
| Corrected Quasi Likelihood under Independence Model Criterion (QICC) <sup>b</sup> | 14504,580 |
|-----------------------------------------------------------------------------------|-----------|

Dependent Variable: Any work absence due to MENTAL DISEASE occurred in the period

Model: (Intercept), Exposure to the pandemia environment, Healthcare provider category, Gender<sup>a</sup>

a. Information criteria are in smaller-is-better form.

b. Computed using the full log quasi-likelihood function.

### Tests of Model Effects

| Source                               | Wald Chi-Square | Type III df | Sig. |
|--------------------------------------|-----------------|-------------|------|
| (Intercept)                          | 7205,049        | 1           | ,000 |
| Exposure to the pandemia environment | 65,221          | 1           | ,000 |
| Healthcare provider category         | 124,516         | 4           | ,000 |
| Gender                               | 50,744          | 1           | ,000 |

Dependent Variable: Any work absence due to MENTAL DISEASE occurred in the period

Model: (Intercept), Exposure to the pandemia environment, Healthcare provider category, Gender

### Parameter Estimates

| Parameter   | B      | Std. Error | 95% Wald Confidence Interval |        | Hypothesis Test |    |      | Exp(B) | 95% Wald Confidence Interval for Exp(B) |       |
|-------------|--------|------------|------------------------------|--------|-----------------|----|------|--------|-----------------------------------------|-------|
|             |        |            | Lower                        | Upper  | Wald Chi-Square | df | Sig. |        | Lower                                   | Upper |
| (Intercept) | -4,349 | ,0916      | -4,529                       | -4,170 | 2254,693        | 1  | ,000 | ,013   | ,011                                    | ,015  |

Supporting Information. Part5

|                                          |                |       |       |       |         |   |      |       |       |       |
|------------------------------------------|----------------|-------|-------|-------|---------|---|------|-------|-------|-------|
| [Exposure to the pandemic environment=1] | ,375           | ,0464 | ,284  | ,465  | 65,221  | 1 | ,000 | 1,454 | 1,328 | 1,593 |
| [Exposure to the pandemic environment=0] | 0 <sup>a</sup> | .     | .     | .     | .       | . | .    | 1     | .     | .     |
| [Healthcare provider category=5]         | ,868           | ,1127 | ,647  | 1,089 | 59,247  | 1 | ,000 | 2,381 | 1,909 | 2,970 |
| [Healthcare provider category=4]         | ,966           | ,0948 | ,780  | 1,152 | 103,855 | 1 | ,000 | 2,628 | 2,182 | 3,164 |
| [Healthcare provider category=3]         | 1,014          | ,1511 | ,718  | 1,310 | 45,049  | 1 | ,000 | 2,756 | 2,050 | 3,706 |
| [Healthcare provider category=2]         | 1,069          | ,1001 | ,873  | 1,265 | 114,061 | 1 | ,000 | 2,911 | 2,393 | 3,542 |
| [Healthcare provider category=1]         | 0 <sup>a</sup> | .     | .     | .     | .       | . | .    | 1     | .     | .     |
| [Gender=1]                               | -,571          | ,0802 | -,728 | -,414 | 50,744  | 1 | ,000 | ,565  | ,483  | ,661  |
| [Gender=0]                               | 0 <sup>a</sup> | .     | .     | .     | .       | . | .    | 1     | .     | .     |
| (Scale)                                  | 1              |       |       |       |         |   |      |       |       |       |

Dependent Variable: Any work absence due to MENTAL DISEASE occurred in the period

Model: (Intercept), Exposure to the pandemic environment, Healthcare provider category, Gender

a. Set to zero because this parameter is redundant.

Did the physicians themselves changed their profile regarding work absences across the periods of pre-pandemia (2019) and pandemic (2020)?

USE ALL.

COMPUTE filter\_\$=(HCPcateg = 1).

VARIABLE LABELS filter\_\$ 'HCPcateg = 1 (FILTER)'.  
 VALUE LABELS filter\_\$ 0 'Not Selected' 1 'Selected'.  
 FORMATS filter\_\$ (f1.0).  
 FILTER BY filter\_\$.  
 EXECUTE.

\* Generalized Estimating Equations.

GENLIN AbAC (REFERENCE=FIRST) BY AsgnGrp Sex (ORDER=DESCENDING)

/MODEL AsgnGrp Sex INTERCEPT=YES

DISTRIBUTION=BINOMIAL LINK=LOGIT

/CRITERIA METHOD=FISHER(1) SCALE=1 MAXITERATIONS=100 MAXSTEPHALVING=5 PCONVERGE=1E-006 (ABSOLUTE)

SINGULAR=1E-012 ANALYSISTYPE=3(WALD) CILEVEL=95 LIKELIHOOD=FULL

/REPEATED SUBJECT=ID WITHINSUBJECT=AsgnGrp SORT=YES CORRTYPE=UNSTRUCTURED ADJUSTCORR=YES

COVB=ROBUST MAXITERATIONS=100 PCONVERGE=1e-006 (ABSOLUTE) UPDATECORR=1

Supporting Information. Part5

```
/MISSING CLASSMISSING=EXCLUDE  
/PRINT CPS DESCRIPTIVES MODELINFO FIT SUMMARY SOLUTION (EXPONENTIATED).
```

## Generalized Linear Models

### Model Information

|                                      |   |                                                                        |
|--------------------------------------|---|------------------------------------------------------------------------|
| Dependent Variable                   |   | Any work absence due to ALL CAUSES occurred in the period <sup>a</sup> |
| Probability Distribution             |   | Binomial                                                               |
| Link Function                        |   | Logit                                                                  |
| Subject Effect                       | 1 | ID                                                                     |
| Within-Subject Effect                | 1 | Exposure to the pandemia environment                                   |
| Working Correlation Matrix Structure |   | Unstructured                                                           |

a. The procedure models Yes as the response, treating No as the reference category.

### Case Processing Summary

|          | N     | Percent |
|----------|-------|---------|
| Included | 13742 | 100,0%  |
| Excluded | 0     | 0,0%    |
| Total    | 13742 | 100,0%  |

### Correlated Data Summary

|                                    |                       |                                      |      |
|------------------------------------|-----------------------|--------------------------------------|------|
| Number of Levels                   | Subject Effect        | ID                                   | 6871 |
|                                    | Within-Subject Effect | Exposure to the pandemia environment | 2    |
| Number of Subjects                 |                       |                                      | 6871 |
| Number of Measurements per Subject | Minimum               |                                      | 2    |
|                                    | Maximum               |                                      | 2    |
| Correlation Matrix Dimension       |                       |                                      | 2    |

### Categorical Variable Information

|                    |                                                           |                    | N     | Percent |
|--------------------|-----------------------------------------------------------|--------------------|-------|---------|
| Dependent Variable | Any work absence due to ALL CAUSES occurred in the period | No                 | 9068  | 66,0%   |
|                    |                                                           | Yes                | 4674  | 34,0%   |
|                    |                                                           | Total              | 13742 | 100,0%  |
| Factor             | Exposure to the pandemia environment                      | Exposed (2020)     | 6871  | 50,0%   |
|                    |                                                           | Non-Exposed (2019) | 6871  | 50,0%   |
|                    |                                                           | Total              | 13742 | 100,0%  |
|                    | Gender                                                    | Male               | 6310  | 45,9%   |
|                    |                                                           | Female             | 7432  | 54,1%   |
|                    |                                                           | Total              | 13742 | 100,0%  |

### Goodness of Fit<sup>a</sup>

|                                                                        | Value     |
|------------------------------------------------------------------------|-----------|
| Quasi Likelihood under Independence Model Criterion (QIC) <sup>b</sup> | 17171,106 |

|                                                                                   |           |
|-----------------------------------------------------------------------------------|-----------|
| Corrected Quasi Likelihood under Independence Model Criterion (QICC) <sup>b</sup> | 17170,830 |
|-----------------------------------------------------------------------------------|-----------|

Dependent Variable: Any work absence due to ALL CAUSES occurred in the period

Model: (Intercept), Exposure to the pandemia environment, Gender<sup>a</sup>

a. Information criteria are in smaller-is-better form.

b. Computed using the full log quasi-likelihood function.

### Tests of Model Effects

| Source                               | Wald Chi-Square | Type III df | Sig. |
|--------------------------------------|-----------------|-------------|------|
| (Intercept)                          | 1288,536        | 1           | ,000 |
| Exposure to the pandemia environment | 111,548         | 1           | ,000 |
| Gender                               | 309,243         | 1           | ,000 |

Dependent Variable: Any work absence due to ALL CAUSES occurred in the period

Model: (Intercept), Exposure to the pandemia environment, Gender

### Parameter Estimates

| Parameter                                | B     | Std. Error | 95% Wald Confidence Interval |       | Hypothesis Test |    |      | Exp(B) | 95% Wald Confidence Interval for Exp(B) |       |
|------------------------------------------|-------|------------|------------------------------|-------|-----------------|----|------|--------|-----------------------------------------|-------|
|                                          |       |            | Lower                        | Upper | Wald Chi-Square | df | Sig. |        | Lower                                   | Upper |
| (Intercept)                              | -,186 | ,0301      | -,245                        | -,127 | 38,172          | 1  | ,000 | ,830   | ,783                                    | ,881  |
| [Exposure to the pandemia environment=1] | -,359 | ,0340      | -,426                        | -,293 | 111,548         | 1  | ,000 | ,698   | ,653                                    | ,746  |

Supporting Information. Part5

|                                          |                |       |       |       |         |   |      |      |      |      |
|------------------------------------------|----------------|-------|-------|-------|---------|---|------|------|------|------|
| [Exposure to the pandemia environment=0] | 0 <sup>a</sup> | .     | .     | .     | .       | . | .    | 1    | .    | .    |
| [Gender=1]                               | -,701          | ,0399 | -,779 | -,623 | 309,243 | 1 | ,000 | ,496 | ,459 | ,537 |
| [Gender=0]                               | 0 <sup>a</sup> | .     | .     | .     | .       | . | .    | 1    | .    | .    |
| (Scale)                                  | 1              |       |       |       |         |   |      |      |      |      |

Dependent Variable: Any work absence due to ALL CAUSES occurred in the period

Model: (Intercept), Exposure to the pandemia environment, Gender

a. Set to zero because this parameter is redundant.

\* Generalized Estimating Equations.

GENLIN AbHRel (REFERENCE=FIRST) BY AsgnGrp Sex (ORDER=DESCENDING)

/MODEL AsgnGrp Sex INTERCEPT=YES

DISTRIBUTION=BINOMIAL LINK=LOGIT

/CRITERIA METHOD=FISHER(1) SCALE=1 MAXITERATIONS=100 MAXSTEPHALVING=5 PCONVERGE=1E-006 (ABSOLUTE)

SINGULAR=1E-012 ANALYSISTYPE=3 (WALD) CILEVEL=95 LIKELIHOOD=FULL

/REPEATED SUBJECT=ID WITHINSUBJECT=AsgnGrp SORT=YES CORRTYPE=UNSTRUCTURED ADJUSTCORR=YES

COVB=ROBUST MAXITERATIONS=100 PCONVERGE=1e-006 (ABSOLUTE) UPDATECORR=1

/MISSING CLASSMISSING=EXCLUDE

/PRINT CPS DESCRIPTIVES MODELINFO FIT SUMMARY SOLUTION (EXPONENTIATED).

## Generalized Linear Models

### Model Information

|                          |                                                                                   |
|--------------------------|-----------------------------------------------------------------------------------|
| Dependent Variable       | Any work absence due to HEALTH-RELATED CAUSES occurred in the period <sup>a</sup> |
| Probability Distribution | Binomial                                                                          |
| Link Function            | Logit                                                                             |



|                                      |   |                                      |
|--------------------------------------|---|--------------------------------------|
| Subject Effect                       | 1 | ID                                   |
| Within-Subject Effect                | 1 | Exposure to the pandemia environment |
| Working Correlation Matrix Structure |   | Unstructured                         |

a. The procedure models Yes as the response, treating No as the reference category.

### Case Processing Summary

|          | N     | Percent |
|----------|-------|---------|
| Included | 13742 | 100,0%  |
| Excluded | 0     | 0,0%    |
| Total    | 13742 | 100,0%  |

### Correlated Data Summary

|                                    |                       |                                      |      |
|------------------------------------|-----------------------|--------------------------------------|------|
| Number of Levels                   | Subject Effect        | ID                                   | 6871 |
|                                    | Within-Subject Effect | Exposure to the pandemia environment | 2    |
| Number of Subjects                 |                       |                                      | 6871 |
| Number of Measurements per Subject | Minimum               |                                      | 2    |
|                                    | Maximum               |                                      | 2    |
| Correlation Matrix Dimension       |                       |                                      | 2    |

### Categorical Variable Information

|                    |                                                                      |       | N     | Percent |
|--------------------|----------------------------------------------------------------------|-------|-------|---------|
| Dependent Variable | Any work absence due to HEALTH-RELATED CAUSES occurred in the period | No    | 10631 | 77,4%   |
|                    |                                                                      | Yes   | 3111  | 22,6%   |
|                    |                                                                      | Total | 13742 | 100,0%  |

|        |                                      |                    |       |        |
|--------|--------------------------------------|--------------------|-------|--------|
| Factor | Exposure to the pandemia environment | Exposed (2020)     | 6871  | 50,0%  |
|        |                                      | Non-Exposed (2019) | 6871  | 50,0%  |
|        |                                      | Total              | 13742 | 100,0% |
| Gender |                                      | Male               | 6310  | 45,9%  |
|        |                                      | Female             | 7432  | 54,1%  |
|        |                                      | Total              | 13742 | 100,0% |

### Goodness of Fit<sup>a</sup>

|                                                                                   | Value     |
|-----------------------------------------------------------------------------------|-----------|
| Quasi Likelihood under Independence Model Criterion (QIC) <sup>b</sup>            | 14323,357 |
| Corrected Quasi Likelihood under Independence Model Criterion (QICC) <sup>b</sup> | 14323,057 |

Dependent Variable: Any work absence due to HEALTH-RELATED CAUSES occurred in the period

Model: (Intercept), Exposure to the pandemia environment, Gender<sup>a</sup>

a. Information criteria are in smaller-is-better form.

b. Computed using the full log quasi-likelihood function.

### Tests of Model Effects

| Source      | Wald Chi-Square | Type III df | Sig. |
|-------------|-----------------|-------------|------|
| (Intercept) | 3160,331        | 1           | ,000 |

|                                      |         |   |      |
|--------------------------------------|---------|---|------|
| Exposure to the pandemia environment | 15,702  | 1 | ,000 |
| Gender                               | 306,043 | 1 | ,000 |

Dependent Variable: Any work absence due to HEALTH-RELATED CAUSES occurred in the period

Model: (Intercept), Exposure to the pandemia environment, Gender

**Parameter Estimates**

| Parameter                                | B              | Std. Error | 95% Wald Confidence Interval |       | Hypothesis Test |    |      | Exp(B) | 95% Wald Confidence Interval for Exp(B) |       |
|------------------------------------------|----------------|------------|------------------------------|-------|-----------------|----|------|--------|-----------------------------------------|-------|
|                                          |                |            | Lower                        | Upper | Wald Chi-Square | df | Sig. |        | Lower                                   | Upper |
| (Intercept)                              | -.826          | ,0332      | -.891                        | -.761 | 619,786         | 1  | ,000 | ,438   | ,410                                    | ,467  |
| [Exposure to the pandemia environment=1] | -.151          | ,0382      | -.226                        | -.076 | 15,702          | 1  | ,000 | ,860   | ,798                                    | ,926  |
| [Exposure to the pandemia environment=0] | 0 <sup>a</sup> | .          | .                            | .     | .               | .  | .    | 1      | .                                       | .     |
| [Gender=1]                               | -.814          | ,0465      | -.905                        | -.722 | 306,043         | 1  | ,000 | ,443   | ,405                                    | ,486  |
| [Gender=0]                               | 0 <sup>a</sup> | .          | .                            | .     | .               | .  | .    | 1      | .                                       | .     |
| (Scale)                                  | 1              |            |                              |       |                 |    |      |        |                                         |       |

Dependent Variable: Any work absence due to HEALTH-RELATED CAUSES occurred in the period

Model: (Intercept), Exposure to the pandemia environment, Gender

a. Set to zero because this parameter is redundant.

\* Generalized Estimating Equations.

GENLIN AbMnt (REFERENCE=FIRST) BY AsgnGrp Sex (ORDER=DESCENDING)

/MODEL AsgnGrp Sex INTERCEPT=YES

DISTRIBUTION=BINOMIAL LINK=LOGIT

/CRITERIA METHOD=FISHER(1) SCALE=1 MAXITERATIONS=100 MAXSTEPHALVING=5 PCONVERGE=1E-006 (ABSOLUTE)

SINGULAR=1E-012 ANALYSISTYPE=3 (WALD) CILEVEL=95 LIKELIHOOD=FULL

/REPEATED SUBJECT=ID WITHINSUBJECT=AsgnGrp SORT=YES CORRTYPE=UNSTRUCTURED ADJUSTCORR=YES

COVB=ROBUST MAXITERATIONS=100 PCONVERGE=1e-006 (ABSOLUTE) UPDATECORR=1

/MISSING CLASSMISSING=EXCLUDE

/PRINT CPS DESCRIPTIVES MODELINFO FIT SUMMARY SOLUTION (EXPONENTIATED).

## Generalized Linear Models

### Model Information

|                                      |                                                                            |                                      |
|--------------------------------------|----------------------------------------------------------------------------|--------------------------------------|
| Dependent Variable                   | Any work absence due to MENTAL DISEASE occurred in the period <sup>a</sup> |                                      |
| Probability Distribution             | Binomial                                                                   |                                      |
| Link Function                        | Logit                                                                      |                                      |
| Subject Effect                       | 1                                                                          | ID                                   |
| Within-Subject Effect                | 1                                                                          | Exposure to the pandemia environment |
| Working Correlation Matrix Structure | Unstructured                                                               |                                      |

a. The procedure models Yes as the response, treating No as the reference category.

### Case Processing Summary

|          | N     | Percent |
|----------|-------|---------|
| Included | 13742 | 100,0%  |
| Excluded | 0     | 0,0%    |
| Total    | 13742 | 100,0%  |

### Correlated Data Summary

|                                    |                       |                                      |      |
|------------------------------------|-----------------------|--------------------------------------|------|
| Number of Levels                   | Subject Effect        | ID                                   | 6871 |
|                                    | Within-Subject Effect | Exposure to the pandemia environment | 2    |
| Number of Subjects                 |                       |                                      | 6871 |
| Number of Measurements per Subject | Minimum               |                                      | 2    |
|                                    | Maximum               |                                      | 2    |
| Correlation Matrix Dimension       |                       |                                      | 2    |

### Categorical Variable Information

|                    |                                                               |                    | N     | Percent |
|--------------------|---------------------------------------------------------------|--------------------|-------|---------|
| Dependent Variable | Any work absence due to MENTAL DISEASE occurred in the period | No                 | 13571 | 98,8%   |
|                    |                                                               | Yes                | 171   | 1,2%    |
|                    |                                                               | Total              | 13742 | 100,0%  |
| Factor             | Exposure to the pandemia environment                          | Exposed (2020)     | 6871  | 50,0%   |
|                    |                                                               | Non-Exposed (2019) | 6871  | 50,0%   |
|                    |                                                               | Total              | 13742 | 100,0%  |
|                    | Gender                                                        | Male               | 6310  | 45,9%   |
|                    |                                                               | Female             | 7432  | 54,1%   |
|                    |                                                               | Total              | 13742 | 100,0%  |

### Goodness of Fit<sup>a</sup>

|                                                                        | Value    |
|------------------------------------------------------------------------|----------|
| Quasi Likelihood under Independence Model Criterion (QIC) <sup>b</sup> | 1780,015 |

|                                                                                   |          |
|-----------------------------------------------------------------------------------|----------|
| Corrected Quasi Likelihood under Independence Model Criterion (QICC) <sup>b</sup> | 1779,872 |
|-----------------------------------------------------------------------------------|----------|

Dependent Variable: Any work absence due to MENTAL DISEASE occurred in the period

Model: (Intercept), Exposure to the pandemia environment, Gender<sup>a</sup>

a. Information criteria are in smaller-is-better form.

b. Computed using the full log quasi-likelihood function.

### Tests of Model Effects

| Source                               | Wald Chi-Square | Type III df | Sig. |
|--------------------------------------|-----------------|-------------|------|
| (Intercept)                          | 2065,771        | 1           | ,000 |
| Exposure to the pandemia environment | 21,295          | 1           | ,000 |
| Gender                               | 36,296          | 1           | ,000 |

Dependent Variable: Any work absence due to MENTAL DISEASE occurred in the period

Model: (Intercept), Exposure to the pandemia environment, Gender

### Parameter Estimates

| Parameter                                | B      | Std. Error | 95% Wald Confidence Interval |        | Hypothesis Test |    |      | Exp(B) | 95% Wald Confidence Interval for Exp(B) |       |
|------------------------------------------|--------|------------|------------------------------|--------|-----------------|----|------|--------|-----------------------------------------|-------|
|                                          |        |            | Lower                        | Upper  | Wald Chi-Square | df | Sig. |        | Lower                                   | Upper |
| (Intercept)                              | -4,400 | ,1398      | -4,674                       | -4,126 | 990,904         | 1  | ,000 | ,012   | ,009                                    | ,016  |
| [Exposure to the pandemia environment=1] | ,704   | ,1525      | ,405                         | 1,003  | 21,295          | 1  | ,000 | 2,021  | 1,499                                   | 2,725 |

Supporting Information. Part5

|                                          |                |       |        |       |        |   |      |      |      |      |
|------------------------------------------|----------------|-------|--------|-------|--------|---|------|------|------|------|
| [Exposure to the pandemia environment=0] | 0 <sup>a</sup> | .     | .      | .     | .      | . | .    | 1    | .    | .    |
| [Gender=1]                               | -1,175         | ,1951 | -1,558 | -,793 | 36,296 | 1 | ,000 | ,309 | ,211 | ,452 |
| [Gender=0]                               | 0 <sup>a</sup> | .     | .      | .     | .      | . | .    | 1    | .    | .    |
| (Scale)                                  | 1              |       |        |       |        |   |      |      |      |      |

Dependent Variable: Any work absence due to MENTAL DISEASE occurred in the period

Model: (Intercept), Exposure to the pandemia environment, Gender

a. Set to zero because this parameter is redundant.

Did the cumulative incidence of COVID cases in the city of the professionals affect the profile of non-COVID Health-Related work absences among health-care providers in those locations?

## GGraph

Simple Scatter with Fit Line of Work absence events due to ANY CAUSE (except COVID) per 100 HCP professionals in the city by COVID cases / 100K inhab in the city

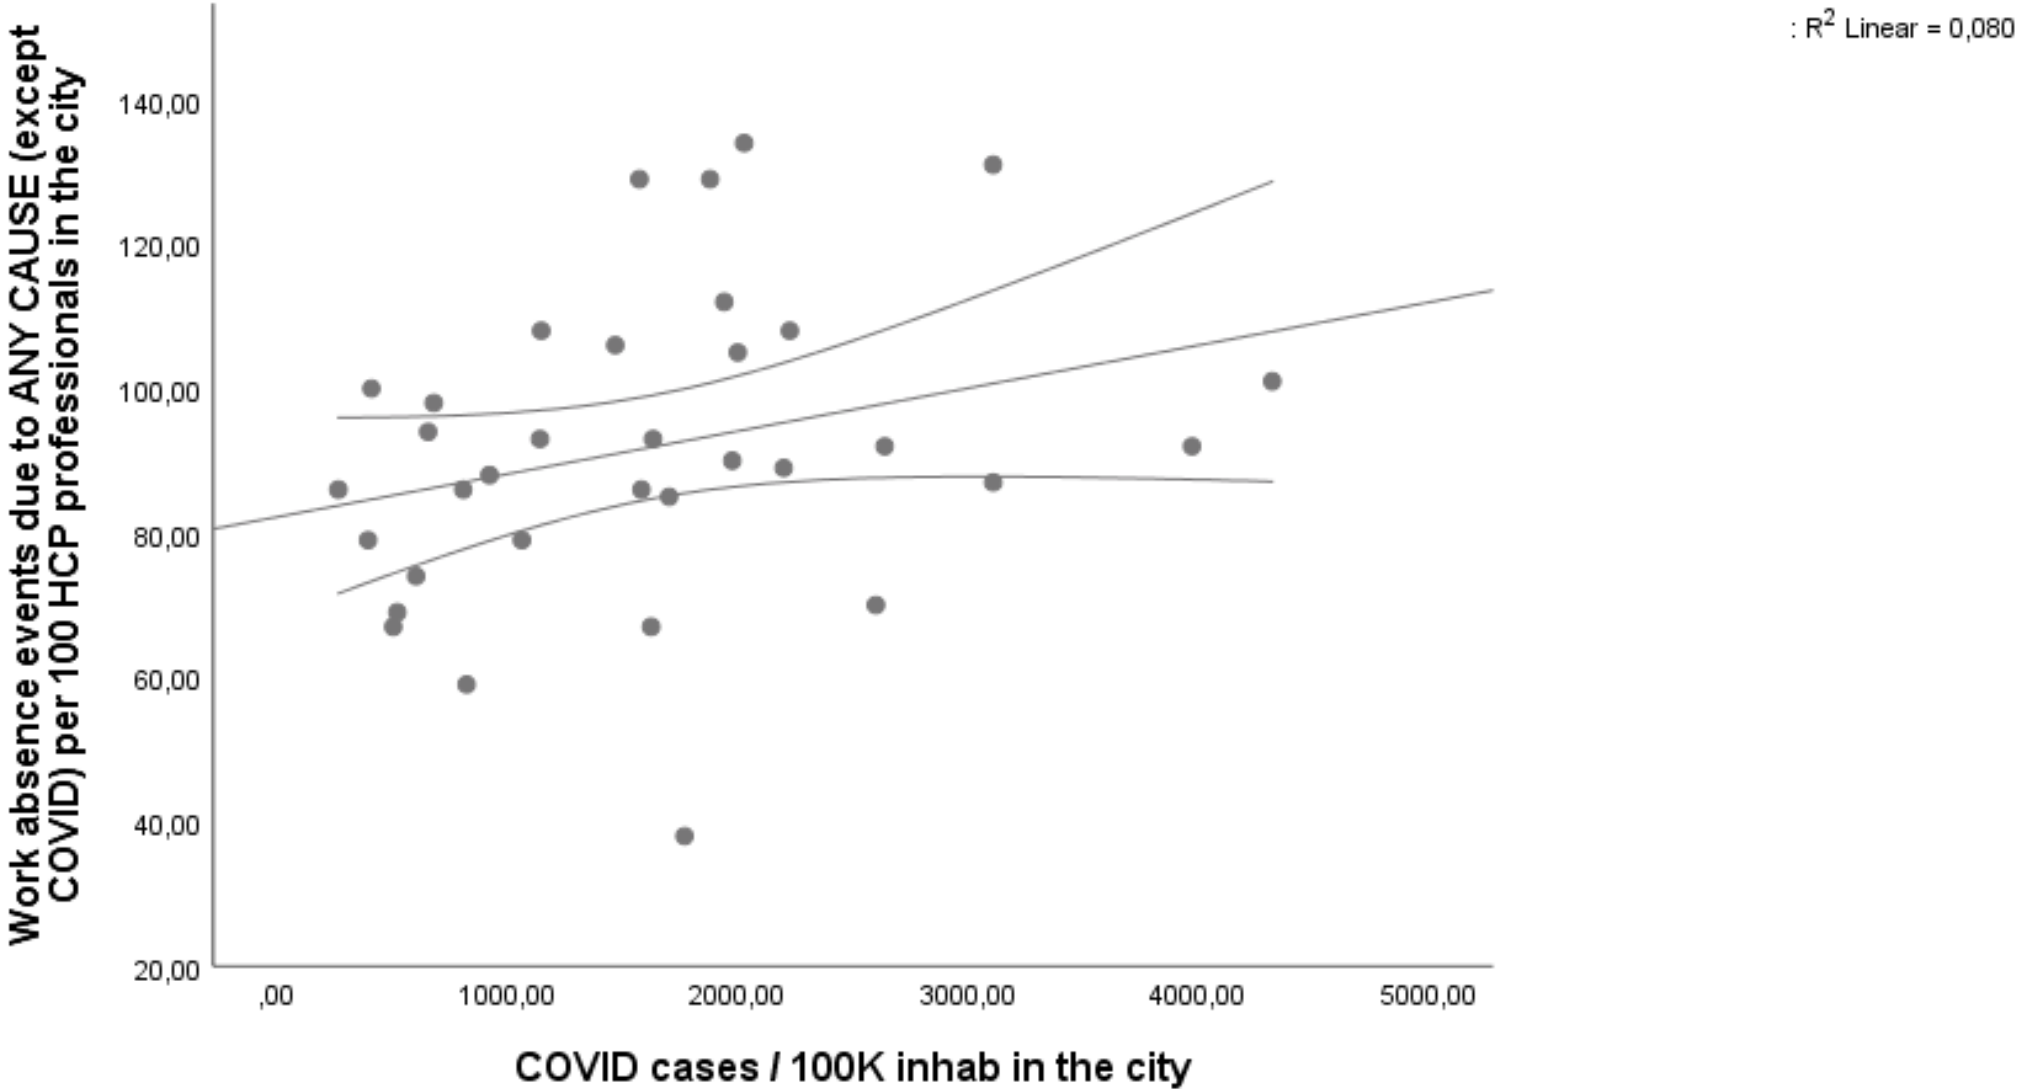



Supporting Information. Part5

```

/PLOT HISTOGRAM NPLOT
/PERCENTILES (5,10,25,50,75,90,95) HAVERAGE
/STATISTICS DESCRIPTIVES
/CINTERVAL 95
/MISSING PAIRWISE
/NOTOTAL.
    
```

**Explore**

**Case Processing Summary**

|                                                                                           | Valid |         | Cases Missing |         | Total |         |
|-------------------------------------------------------------------------------------------|-------|---------|---------------|---------|-------|---------|
|                                                                                           | N     | Percent | N             | Percent | N     | Percent |
| COVID cases / 100K inhab in the city                                                      | 34    | 100,0%  | 0             | 0,0%    | 34    | 100,0%  |
| Work absence events due to ANY CAUSE (except COVID) per 100 HCP professionals in the city | 34    | 100,0%  | 0             | 0,0%    | 34    | 100,0%  |

**Descriptives**

|                                      |                                  | Statistic   | Std. Error |
|--------------------------------------|----------------------------------|-------------|------------|
| COVID cases / 100K inhab in the city | Mean                             | 1624,7937   | 172,14783  |
|                                      | 95% Confidence Interval for Mean | Lower Bound | 1274,5563  |
|                                      |                                  | Upper Bound | 1975,0311  |
|                                      | 5% Trimmed Mean                  | 1555,7030   |            |
|                                      | Median                           | 1601,5129   |            |

Supporting Information. Part5

|                                                                                           |                                  |             |             |         |
|-------------------------------------------------------------------------------------------|----------------------------------|-------------|-------------|---------|
|                                                                                           | Variance                         |             | 1007585,741 |         |
|                                                                                           | Std. Deviation                   |             | 1003,78570  |         |
|                                                                                           | Minimum                          |             | 264,89      |         |
|                                                                                           | Maximum                          |             | 4318,79     |         |
|                                                                                           | Range                            |             | 4053,90     |         |
|                                                                                           | Interquartile Range              |             | 1293,95     |         |
|                                                                                           | Skewness                         |             | ,890        | ,403    |
|                                                                                           | Kurtosis                         |             | ,643        | ,788    |
| Work absence events due to ANY CAUSE (except COVID) per 100 HCP professionals in the city | Mean                             |             | 91,8824     | 3,61068 |
|                                                                                           | 95% Confidence Interval for Mean | Lower Bound | 84,5364     |         |
|                                                                                           |                                  | Upper Bound | 99,2283     |         |
|                                                                                           | 5% Trimmed Mean                  |             | 92,1242     |         |
|                                                                                           | Median                           |             | 91,0000     |         |
|                                                                                           | Variance                         |             | 443,258     |         |
|                                                                                           | Std. Deviation                   |             | 21,05370    |         |
|                                                                                           | Minimum                          |             | 38,00       |         |
|                                                                                           | Maximum                          |             | 134,00      |         |
|                                                                                           | Range                            |             | 96,00       |         |
|                                                                                           | Interquartile Range              |             | 26,25       |         |
|                                                                                           | Skewness                         |             | ,012        | ,403    |
|                                                                                           | Kurtosis                         |             | ,536        | ,788    |

**Percentiles**

|                                |                                      | Percentiles |          |          |           |           |           |           |
|--------------------------------|--------------------------------------|-------------|----------|----------|-----------|-----------|-----------|-----------|
|                                |                                      | 5           | 10       | 25       | 50        | 75        | 90        | 95        |
| Weighted Average(Definition 1) | COVID cases / 100K inhab in the city | 361,5726    | 455,7713 | 775,1292 | 1601,5129 | 2069,0827 | 3107,3040 | 4057,3388 |

Supporting Information. Part5

|                |                                                                                           |         |         |          |           |           |          |          |
|----------------|-------------------------------------------------------------------------------------------|---------|---------|----------|-----------|-----------|----------|----------|
|                | Work absence events due to ANY CAUSE (except COVID) per 100 HCP professionals in the city | 53,7500 | 67,0000 | 79,0000  | 91,0000   | 105,2500  | 129,0000 | 131,7500 |
| Tukey's Hinges | COVID cases / 100K inhab in the city                                                      |         |         | 807,1431 | 1601,5129 | 2026,0278 |          |          |
|                | Work absence events due to ANY CAUSE (except COVID) per 100 HCP professionals in the city |         |         | 79,0000  | 91,0000   | 105,0000  |          |          |

**Tests of Normality**

|                                                                                           | Kolmogorov-Smirnov <sup>a</sup> |    |       | Shapiro-Wilk |    |      |
|-------------------------------------------------------------------------------------------|---------------------------------|----|-------|--------------|----|------|
|                                                                                           | Statistic                       | df | Sig.  | Statistic    | df | Sig. |
| COVID cases / 100K inhab in the city                                                      | ,109                            | 34 | ,200* | ,930         | 34 | ,031 |
| Work absence events due to ANY CAUSE (except COVID) per 100 HCP professionals in the city | ,107                            | 34 | ,200* | ,968         | 34 | ,409 |

\*. This is a lower bound of the true significance.

a. Lilliefors Significance Correction

**COVID cases / 100K inhab in the city**

### Histogram

— Normal

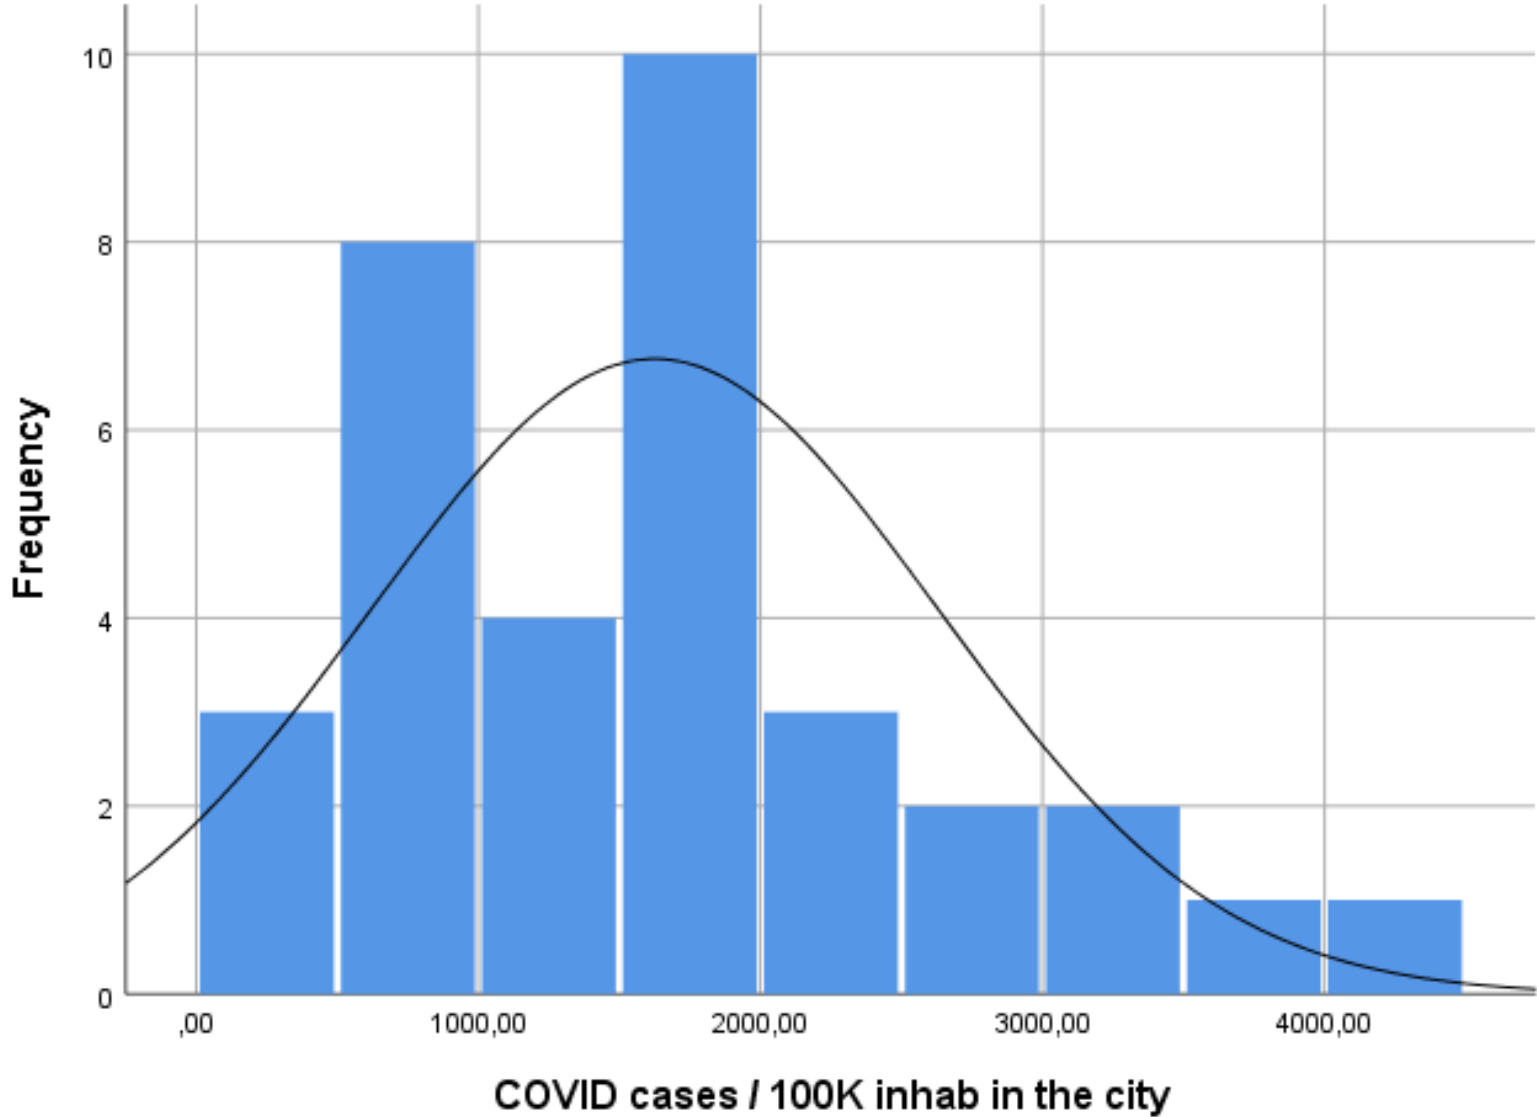

Normal Q-Q Plot of COVID cases / 100K inhab in the city

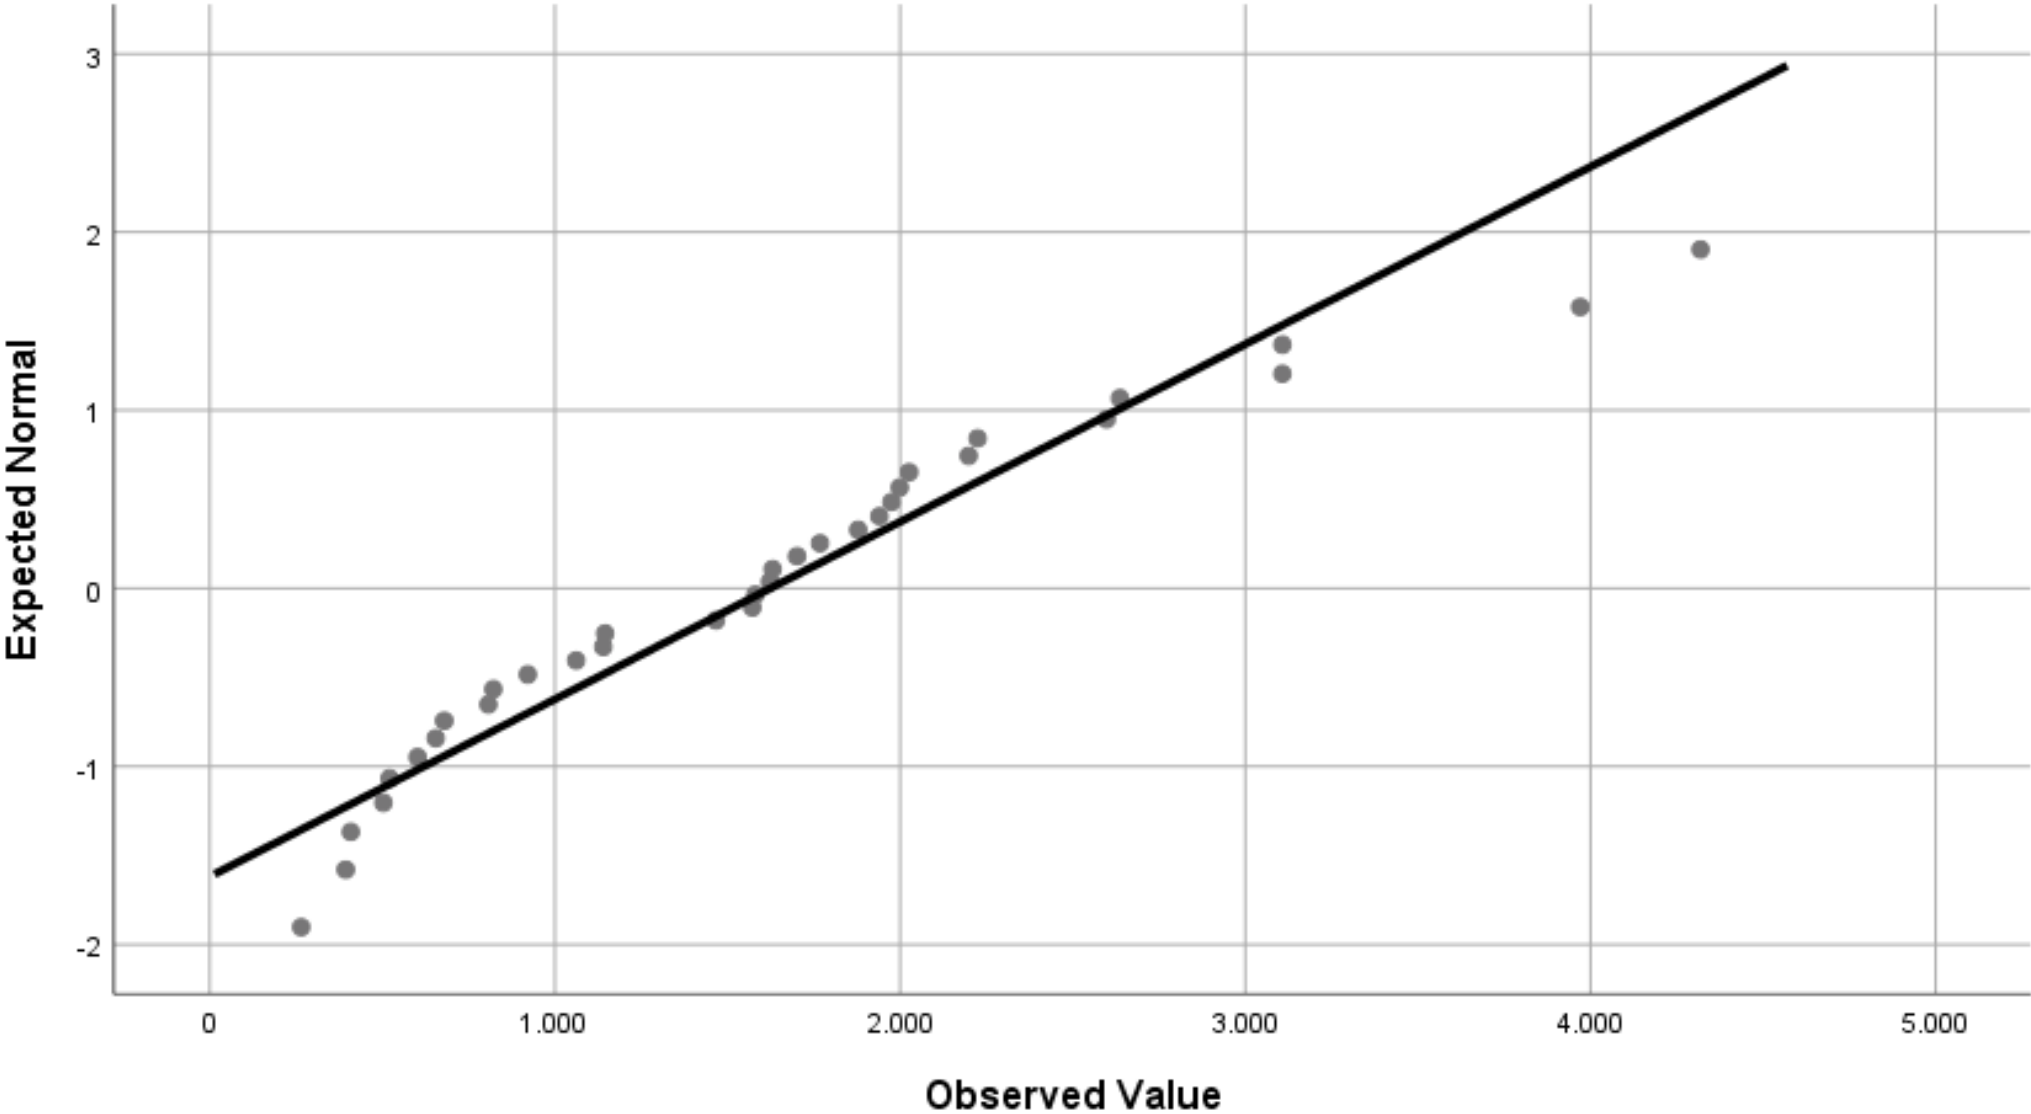

Detrended Normal Q-Q Plot of COVID cases / 100K inhab in the city

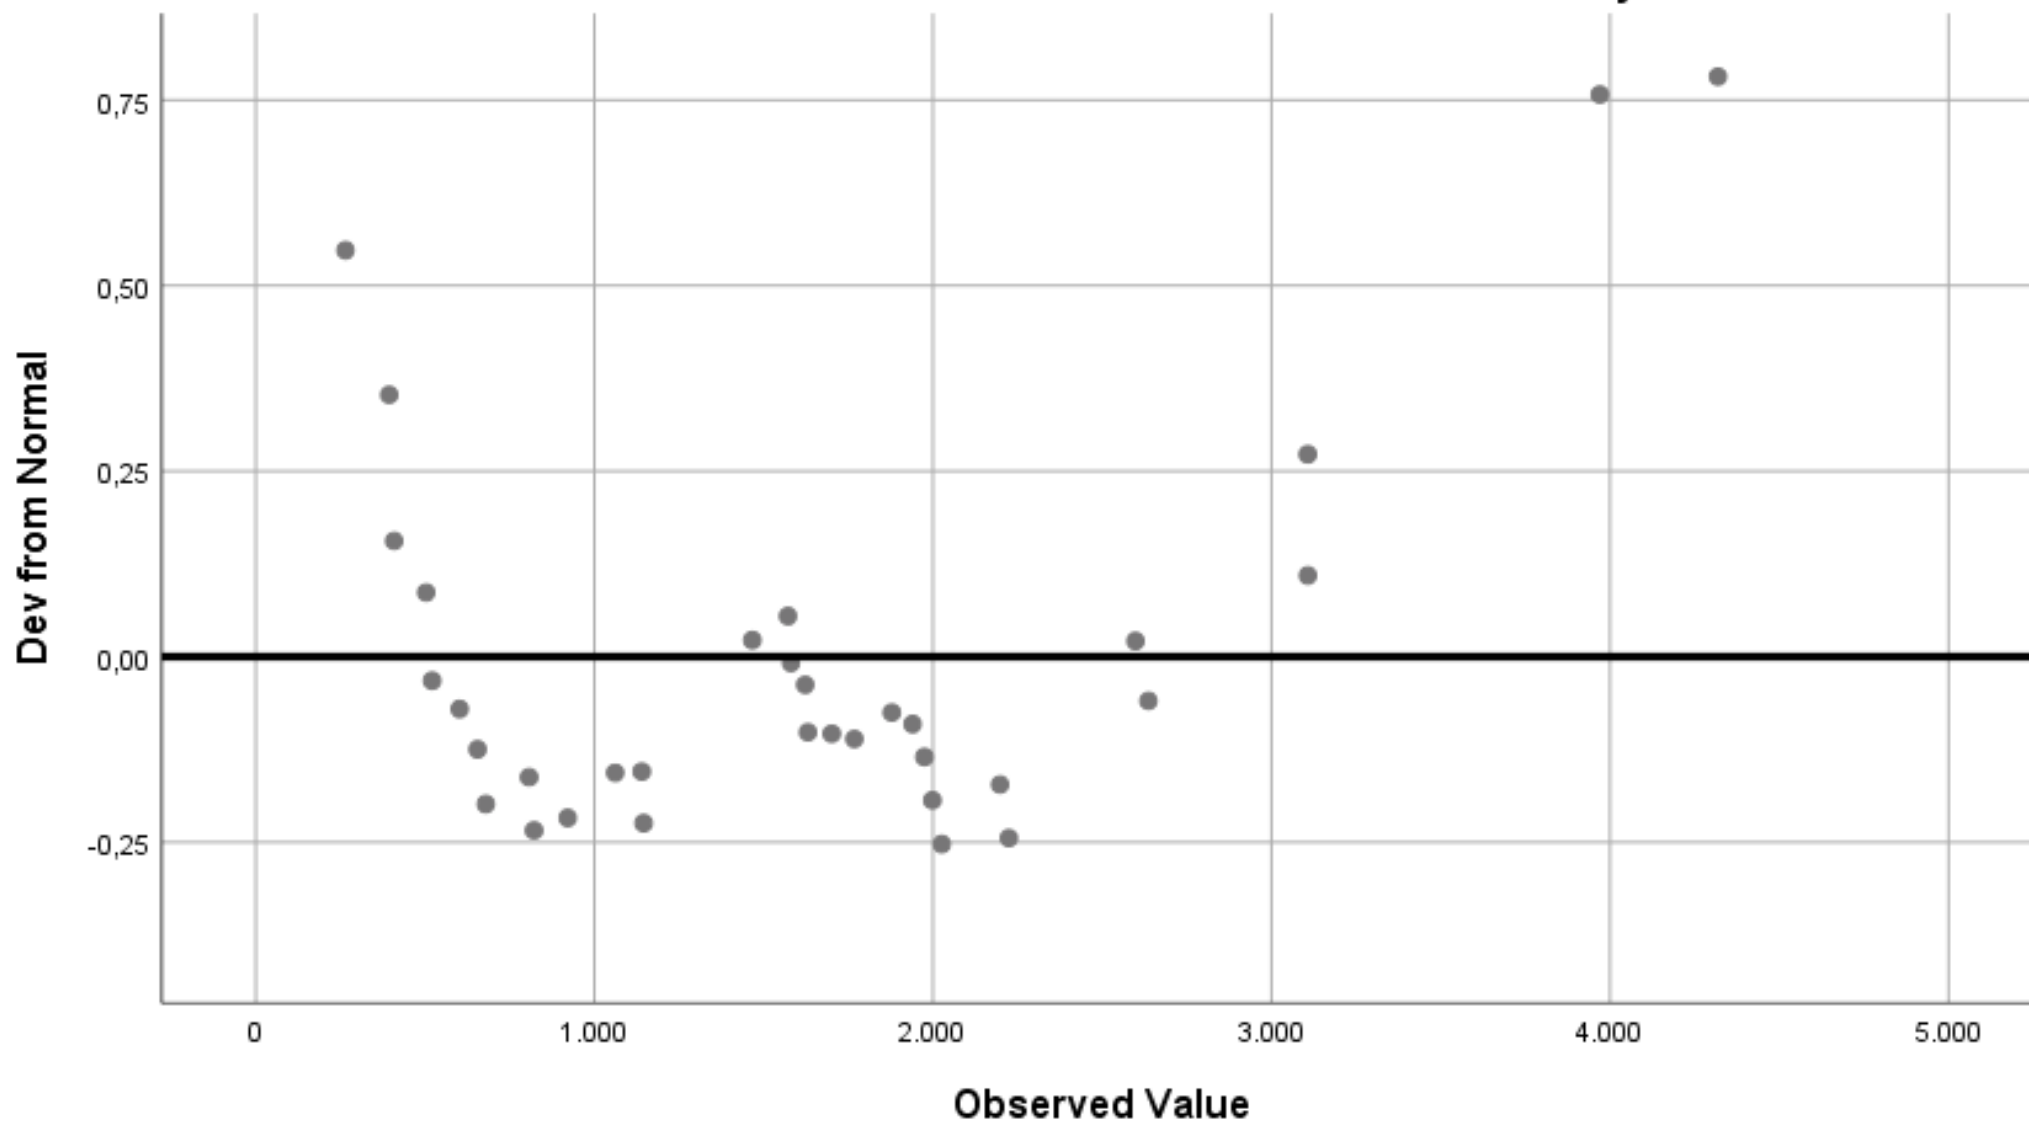

**Work absence events due to ANY CAUSE (except COVID) per 100 HCP professionals in the city**

### Histogram

— Normal

Mean = 91,88  
Std. Dev. = 21,054  
N = 34

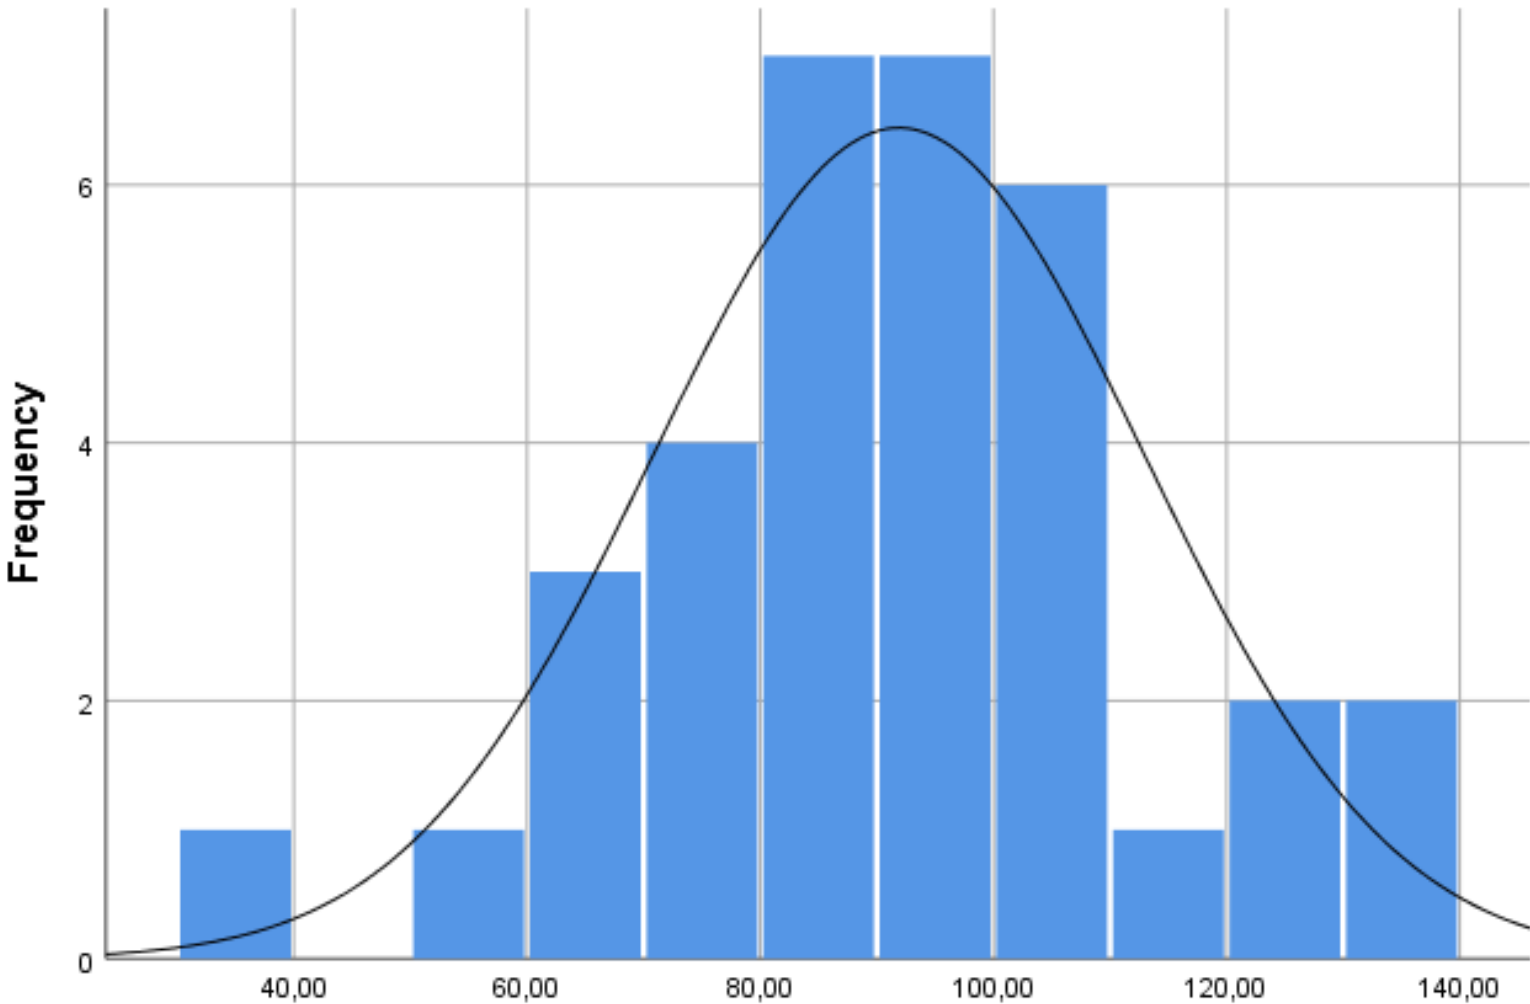

**Work absence events due to ANY CAUSE (except COVID) per 100 HCP professionals in the city**



**Normal Q-Q Plot of Work absence events due to ANY CAUSE (except COVID) per 100 HCP professionals in the city**

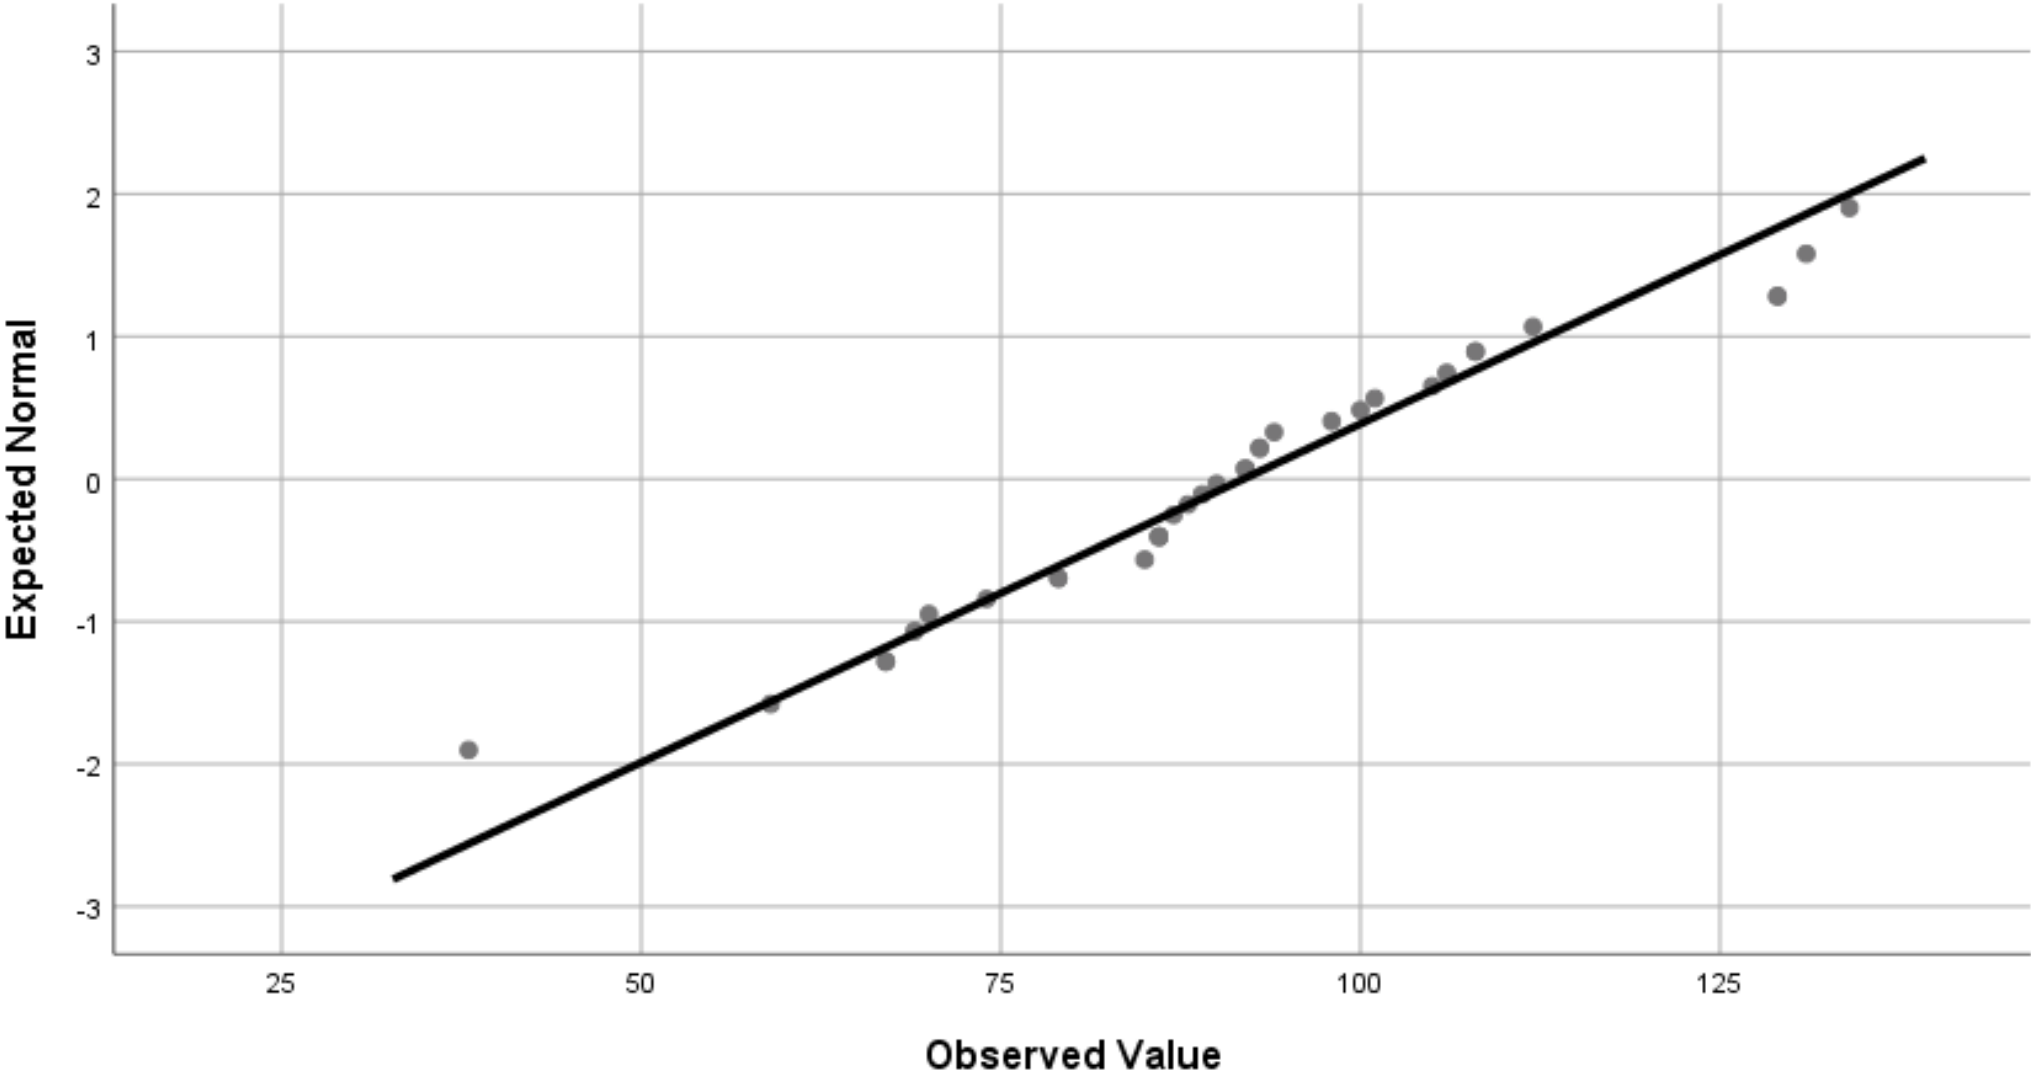

**Detrended Normal Q-Q Plot of Work absence events due to ANY CAUSE (except COVID) per 100 HCP professionals in the city**

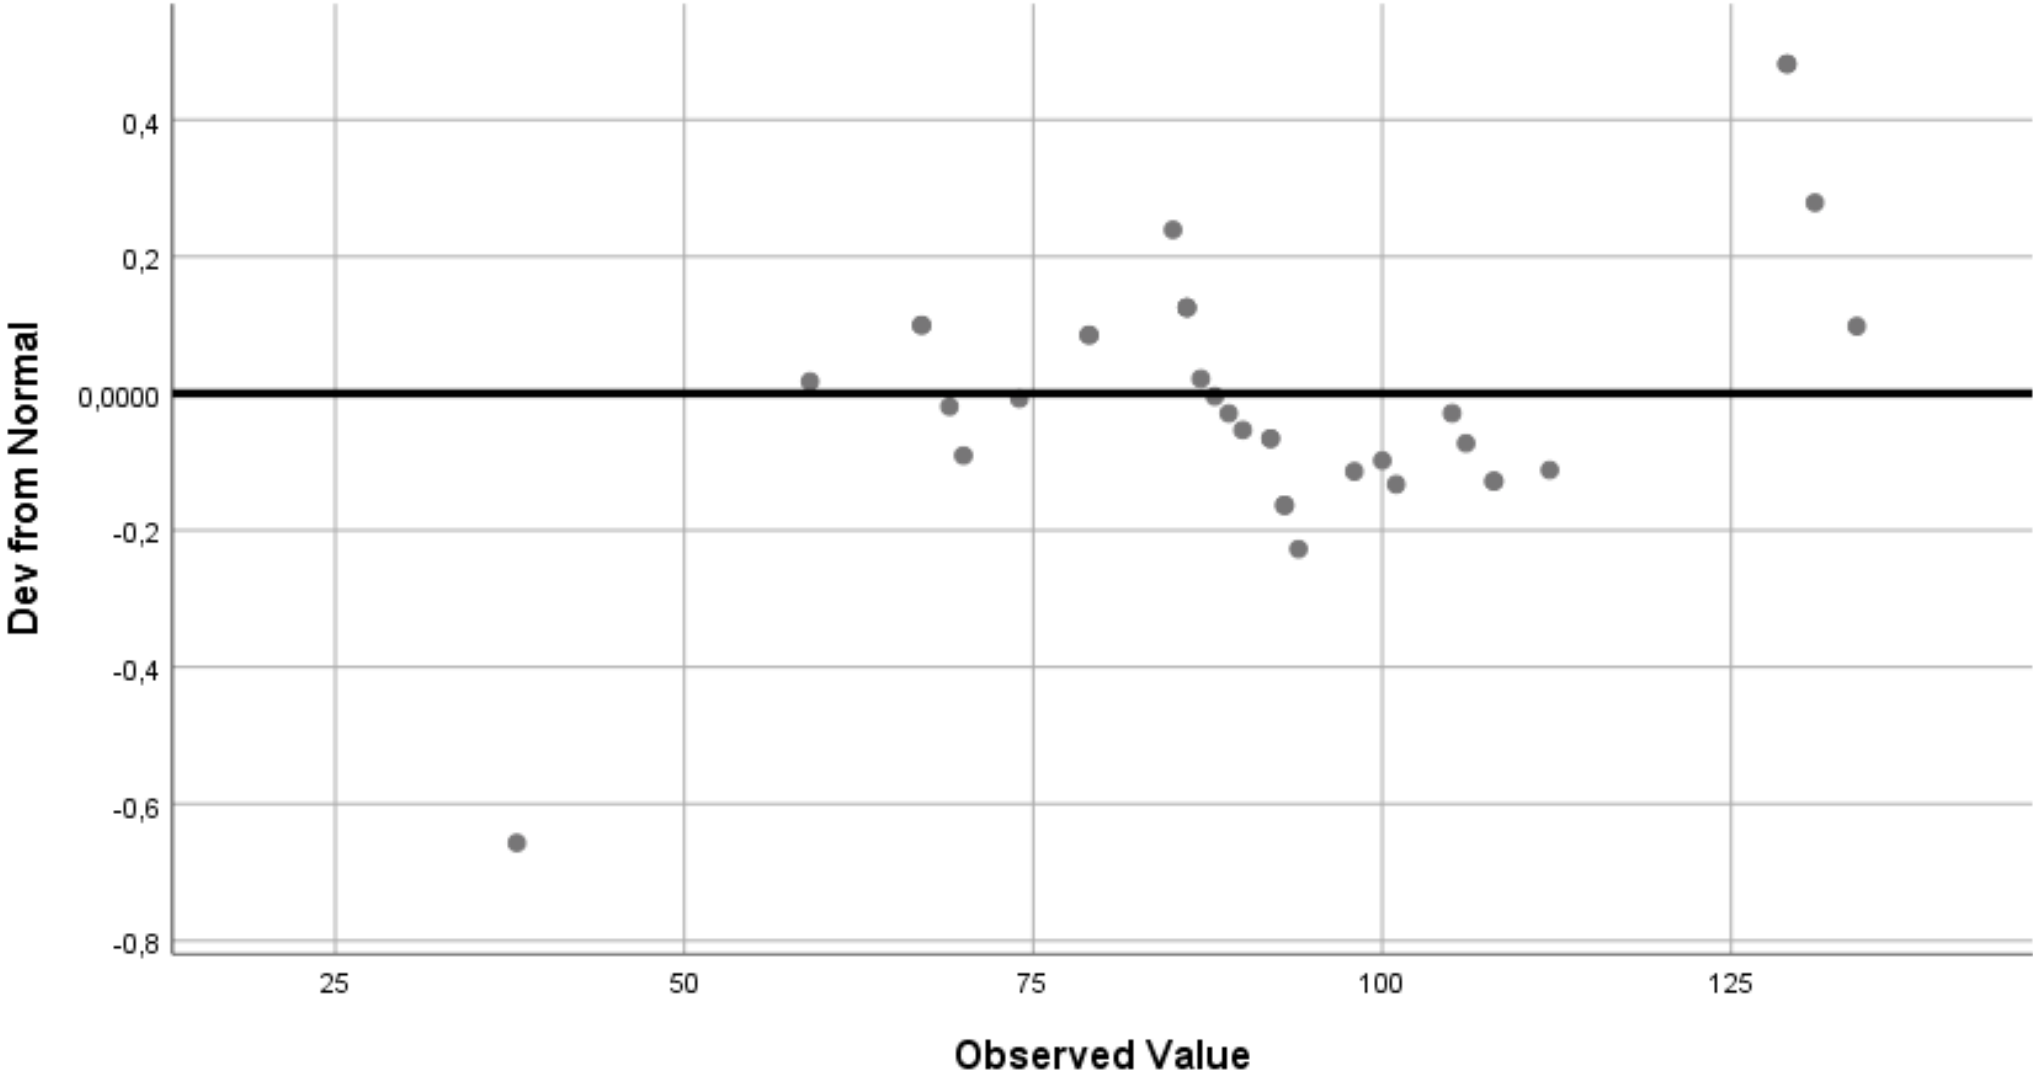

Supporting Information. Part5

```
VARIABLE LABELS LogCovCases100k 'Log COVID cases / 100K inhab in the city'.
```

```
EXECUTE.
```

```
* Chart Builder.
```

```
GGRAPH  
  /GRAPHDATASET NAME="graphdataset" VARIABLES=LogCovCases100k AbAC_HCP_N MISSING=LISTWISE  
  REPORTMISSING=NO  
  /GRAPHSPEC SOURCE=INLINE  
  /FITLINE TOTAL=YES.  
BEGIN GPL  
  SOURCE: s=userSource(id("graphdataset"))  
  DATA: LogCovCases100k=col(source(s), name("LogCovCases100k"))  
  DATA: AbAC_HCP_N=col(source(s), name("AbAC_HCP_N"))  
  GUIDE: axis(dim(1), label("Log COVID cases / 100K inhab in the city"))  
  GUIDE: axis(dim(2), label("Work absence events due to ANY CAUSE (except COVID) per 100 HCP ",  
    "professionals in the city"))  
  GUIDE: text.title(label("Simple Scatter with Fit Line of Work absence events due to ANY CAUSE ",  
    "(except COVID) per 100 HCP professionals in the city by Log COVID cases / 100K inhab in the city"))  
  ELEMENT: point(position(LogCovCases100k*AbAC_HCP_N))  
END GPL.
```

## GGraph

Simple Scatter with Fit Line of Work absence events due to ANY CAUSE (except COVID) per 100 HCP professionals in the city by Log COVID cases / 100K inhab in the city

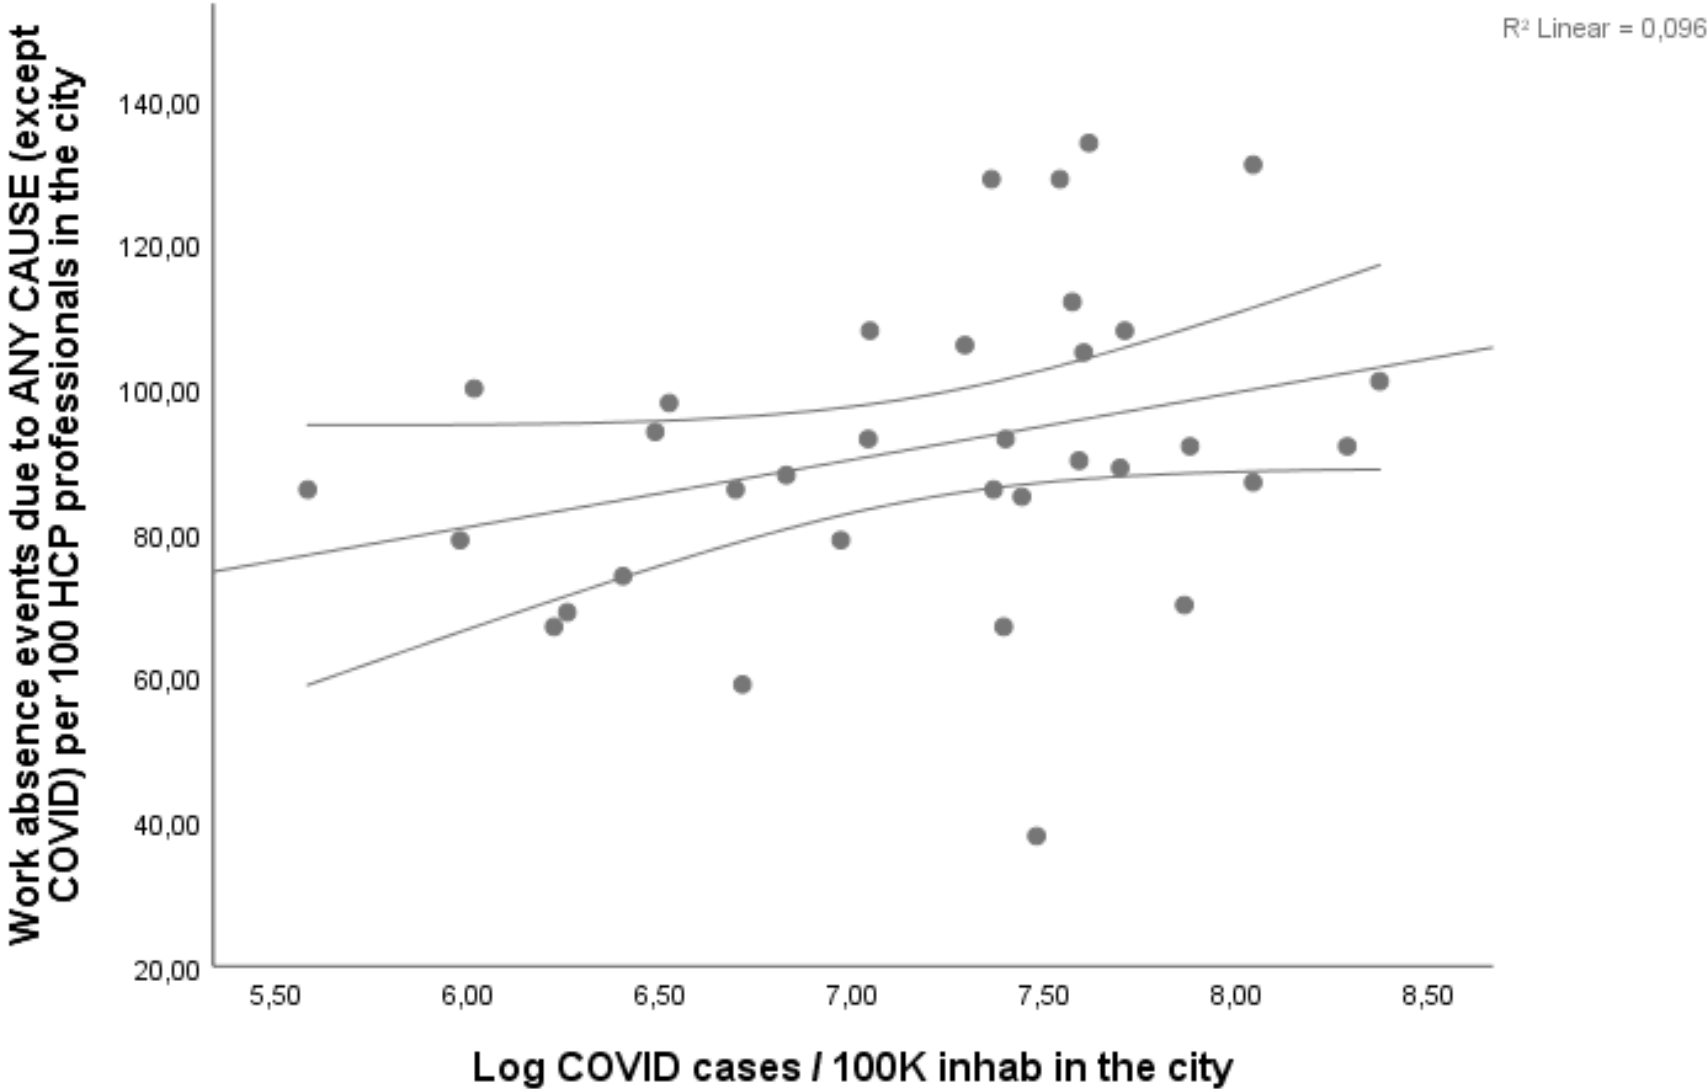

Supporting Information. Part5

```

/VARIABLES=CityCovCases100k AbAC_N AbAC_HCP_N AbHRel_N AbHRel_HCP_N AbMnt_N AbMnt_HCP_N
/PRINT=SPEARMAN TWOTAIL NOSIG
/MISSING=PAIRWISE.
    
```

## Nonparametric Correlations

|                |                                                                                           |                         | Correlations                               |                                                                                                      |                                                                                                          |                                                                                                                     |                                                                                                                         |                                                                                            |                                                                                                |
|----------------|-------------------------------------------------------------------------------------------|-------------------------|--------------------------------------------|------------------------------------------------------------------------------------------------------|----------------------------------------------------------------------------------------------------------|---------------------------------------------------------------------------------------------------------------------|-------------------------------------------------------------------------------------------------------------------------|--------------------------------------------------------------------------------------------|------------------------------------------------------------------------------------------------|
|                |                                                                                           |                         | COVID cases /<br>100K inhab in the<br>city | Work absence<br>events due to ANY<br>CAUSE (except<br>COVID) per 100<br>professionals in the<br>city | Work absence<br>events due to ANY<br>CAUSE (except<br>COVID) per 100<br>HCP professionals<br>in the city | Work absence<br>events due to<br>HEALTH-RELATED<br>causes (except<br>COVID) per 100<br>professionals in the<br>city | Work absence<br>events due to<br>HEALTH-RELATED<br>causes (except<br>COVID) per 100<br>HCP professionals<br>in the city | Work absence<br>events due to<br>MENTAL DISEASE<br>per 100<br>professionals in the<br>city | Work absence<br>events due to<br>MENTAL DISEASE<br>per 100 HCP<br>professionals in the<br>city |
| Spearman's rho | COVID cases / 100K inhab in the city                                                      | Correlation Coefficient | 1,000                                      | ,349 <sup>*</sup>                                                                                    | ,358 <sup>*</sup>                                                                                        | ,301                                                                                                                | ,266                                                                                                                    | ,219                                                                                       | ,188                                                                                           |
|                |                                                                                           | Sig. (2-tailed)         | .                                          | ,043                                                                                                 | ,038                                                                                                     | ,084                                                                                                                | ,128                                                                                                                    | ,214                                                                                       | ,286                                                                                           |
|                |                                                                                           | N                       | 34                                         | 34                                                                                                   | 34                                                                                                       | 34                                                                                                                  | 34                                                                                                                      | 34                                                                                         | 34                                                                                             |
|                | Work absence events due to ANY CAUSE (except COVID) per 100 professionals in the city     | Correlation Coefficient | ,349 <sup>*</sup>                          | 1,000                                                                                                | ,954 <sup>**</sup>                                                                                       | ,834 <sup>**</sup>                                                                                                  | ,830 <sup>**</sup>                                                                                                      | ,318                                                                                       | ,291                                                                                           |
|                |                                                                                           | Sig. (2-tailed)         | ,043                                       | .                                                                                                    | ,000                                                                                                     | ,000                                                                                                                | ,000                                                                                                                    | ,067                                                                                       | ,095                                                                                           |
|                |                                                                                           | N                       | 34                                         | 34                                                                                                   | 34                                                                                                       | 34                                                                                                                  | 34                                                                                                                      | 34                                                                                         | 34                                                                                             |
|                | Work absence events due to ANY CAUSE (except COVID) per 100 HCP professionals in the city | Correlation Coefficient | ,358 <sup>*</sup>                          | ,954 <sup>**</sup>                                                                                   | 1,000                                                                                                    | ,810 <sup>**</sup>                                                                                                  | ,834 <sup>**</sup>                                                                                                      | ,363 <sup>*</sup>                                                                          | ,359 <sup>*</sup>                                                                              |
|                |                                                                                           | Sig. (2-tailed)         | ,038                                       | ,000                                                                                                 | .                                                                                                        | ,000                                                                                                                | ,000                                                                                                                    | ,035                                                                                       | ,037                                                                                           |
|                |                                                                                           | N                       | 34                                         | 34                                                                                                   | 34                                                                                                       | 34                                                                                                                  | 34                                                                                                                      | 34                                                                                         | 34                                                                                             |
|                | Work absence events due to HEALTH-RELATED causes                                          | Correlation Coefficient | ,301                                       | ,834 <sup>**</sup>                                                                                   | ,810 <sup>**</sup>                                                                                       | 1,000                                                                                                               | ,981 <sup>**</sup>                                                                                                      | ,414 <sup>*</sup>                                                                          | ,338                                                                                           |
|                |                                                                                           | Sig. (2-tailed)         | ,084                                       | ,000                                                                                                 | ,000                                                                                                     | .                                                                                                                   | ,000                                                                                                                    | ,015                                                                                       | ,051                                                                                           |

Supporting Information. Part5

|                                                                                 |                         |      |        |        |        |       |        |        |
|---------------------------------------------------------------------------------|-------------------------|------|--------|--------|--------|-------|--------|--------|
| (except COVID) per 100 professionals in the city                                | N                       | 34   | 34     | 34     | 34     | 34    | 34     | 34     |
| Work absence events due to HEALTH-RELATED causes                                | Correlation Coefficient | ,266 | ,830** | ,834** | ,981** | 1,000 | ,396*  | ,337   |
| (except COVID) per 100 HCP professionals in the city                            | Sig. (2-tailed)         | ,128 | ,000   | ,000   | ,000   | .     | ,020   | ,052   |
| Work absence events due to MENTAL DISEASE per 100 professionals in the city     | N                       | 34   | 34     | 34     | 34     | 34    | 34     | 34     |
| Work absence events due to MENTAL DISEASE per 100 HCP professionals in the city | Correlation Coefficient | ,219 | ,318   | ,363*  | ,414*  | ,396* | 1,000  | ,974** |
|                                                                                 | Sig. (2-tailed)         | ,214 | ,067   | ,035   | ,015   | ,020  | .      | ,000   |
| Work absence events due to MENTAL DISEASE per 100 HCP professionals in the city | N                       | 34   | 34     | 34     | 34     | 34    | 34     | 34     |
| Work absence events due to MENTAL DISEASE per 100 HCP professionals in the city | Correlation Coefficient | ,188 | ,291   | ,359*  | ,338   | ,337  | ,974** | 1,000  |
|                                                                                 | Sig. (2-tailed)         | ,286 | ,095   | ,037   | ,051   | ,052  | ,000   | .      |
| Work absence events due to MENTAL DISEASE per 100 HCP professionals in the city | N                       | 34   | 34     | 34     | 34     | 34    | 34     | 34     |

\*. Correlation is significant at the 0.05 level (2-tailed).

\*\*. Correlation is significant at the 0.01 level (2-tailed).

Graphs (Forrest Plots) summarizing the differences (Odds Ratios) between individuals, regarding several causes of work absences, found along the aforementioned analyses.

Graph

**Figure - Comparisons between exposed vs. non-exposed individuals (N=32961) regarding several causes of work absences (unadjusted)**

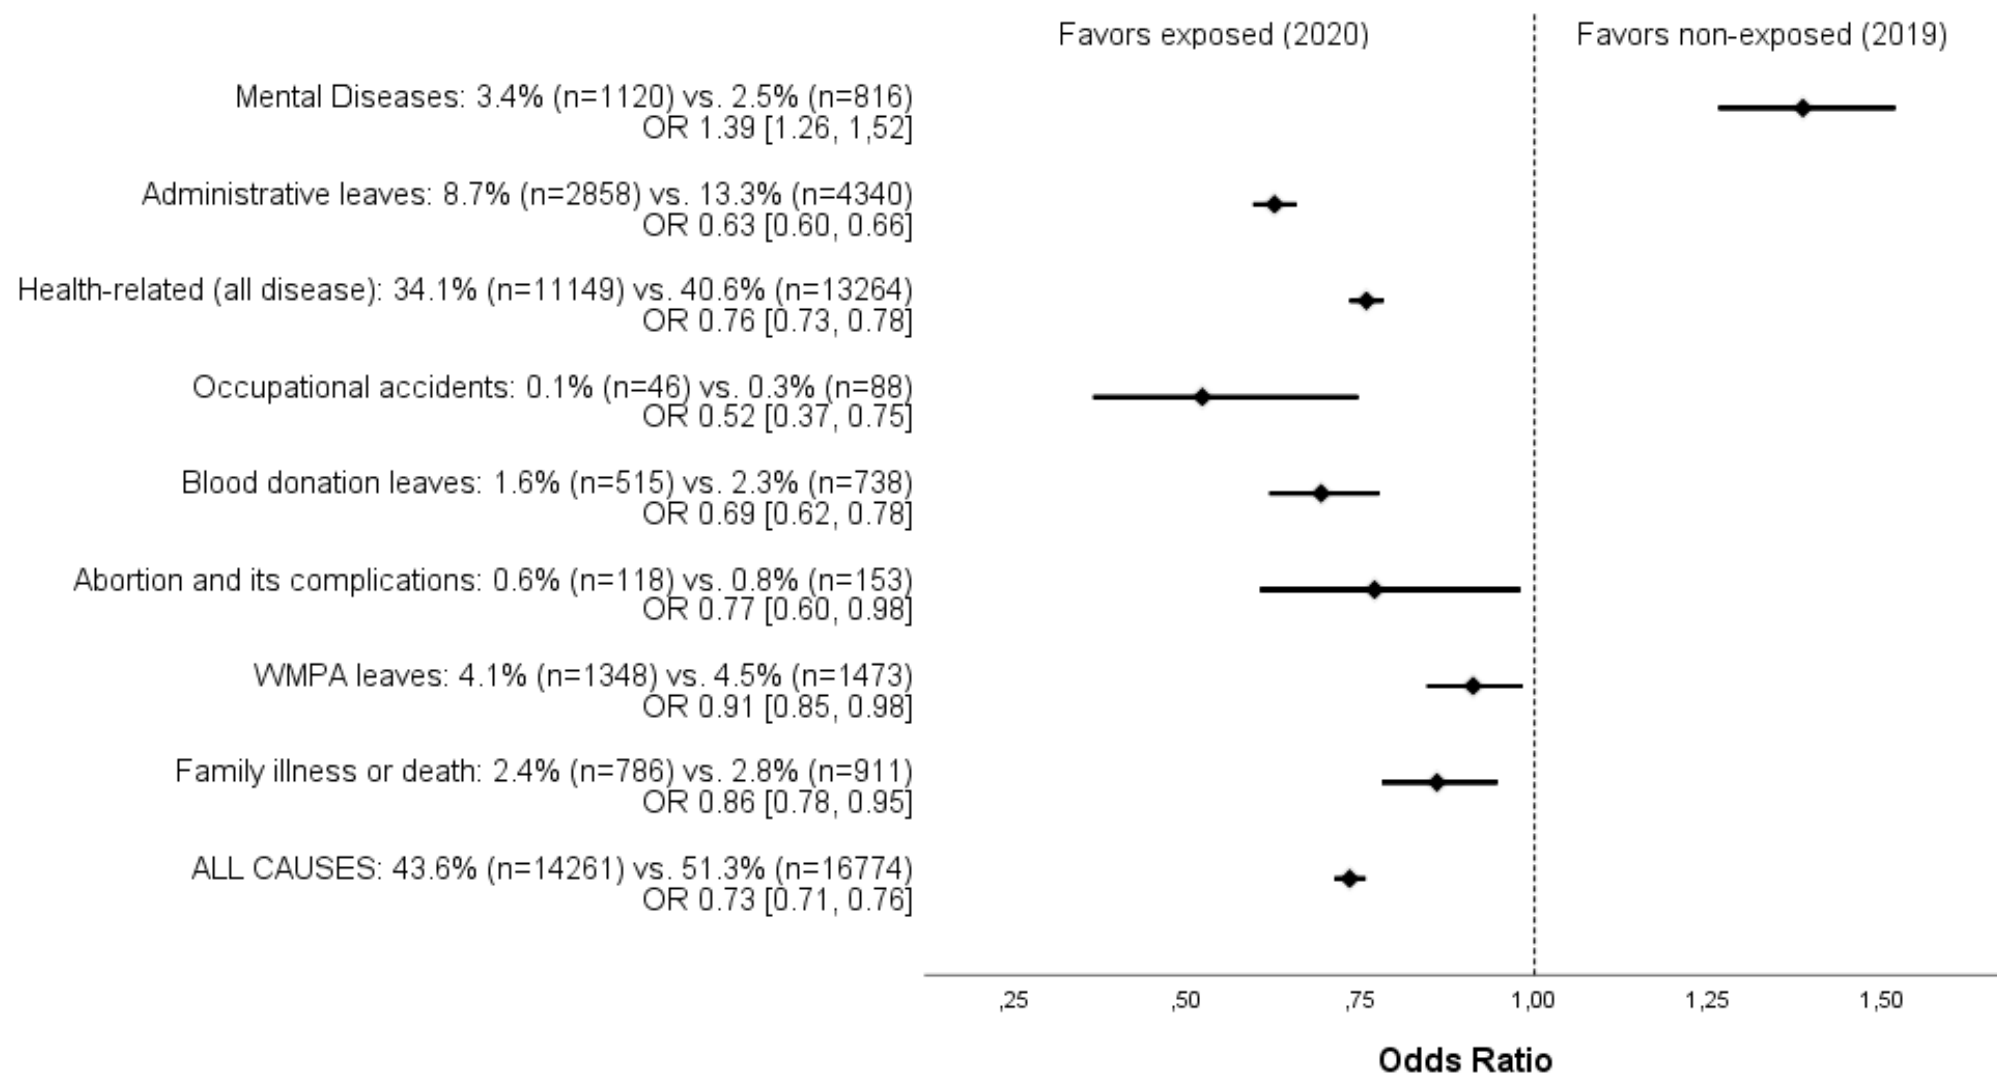

## Graph



**Figure - Comparisons between exposed vs. non-exposed Healthcare Professionals (N=26956) regarding work absences due to All Causes, Health-Related Causes and Mental Diseases, adjusted for differences in HCP categories and gender**

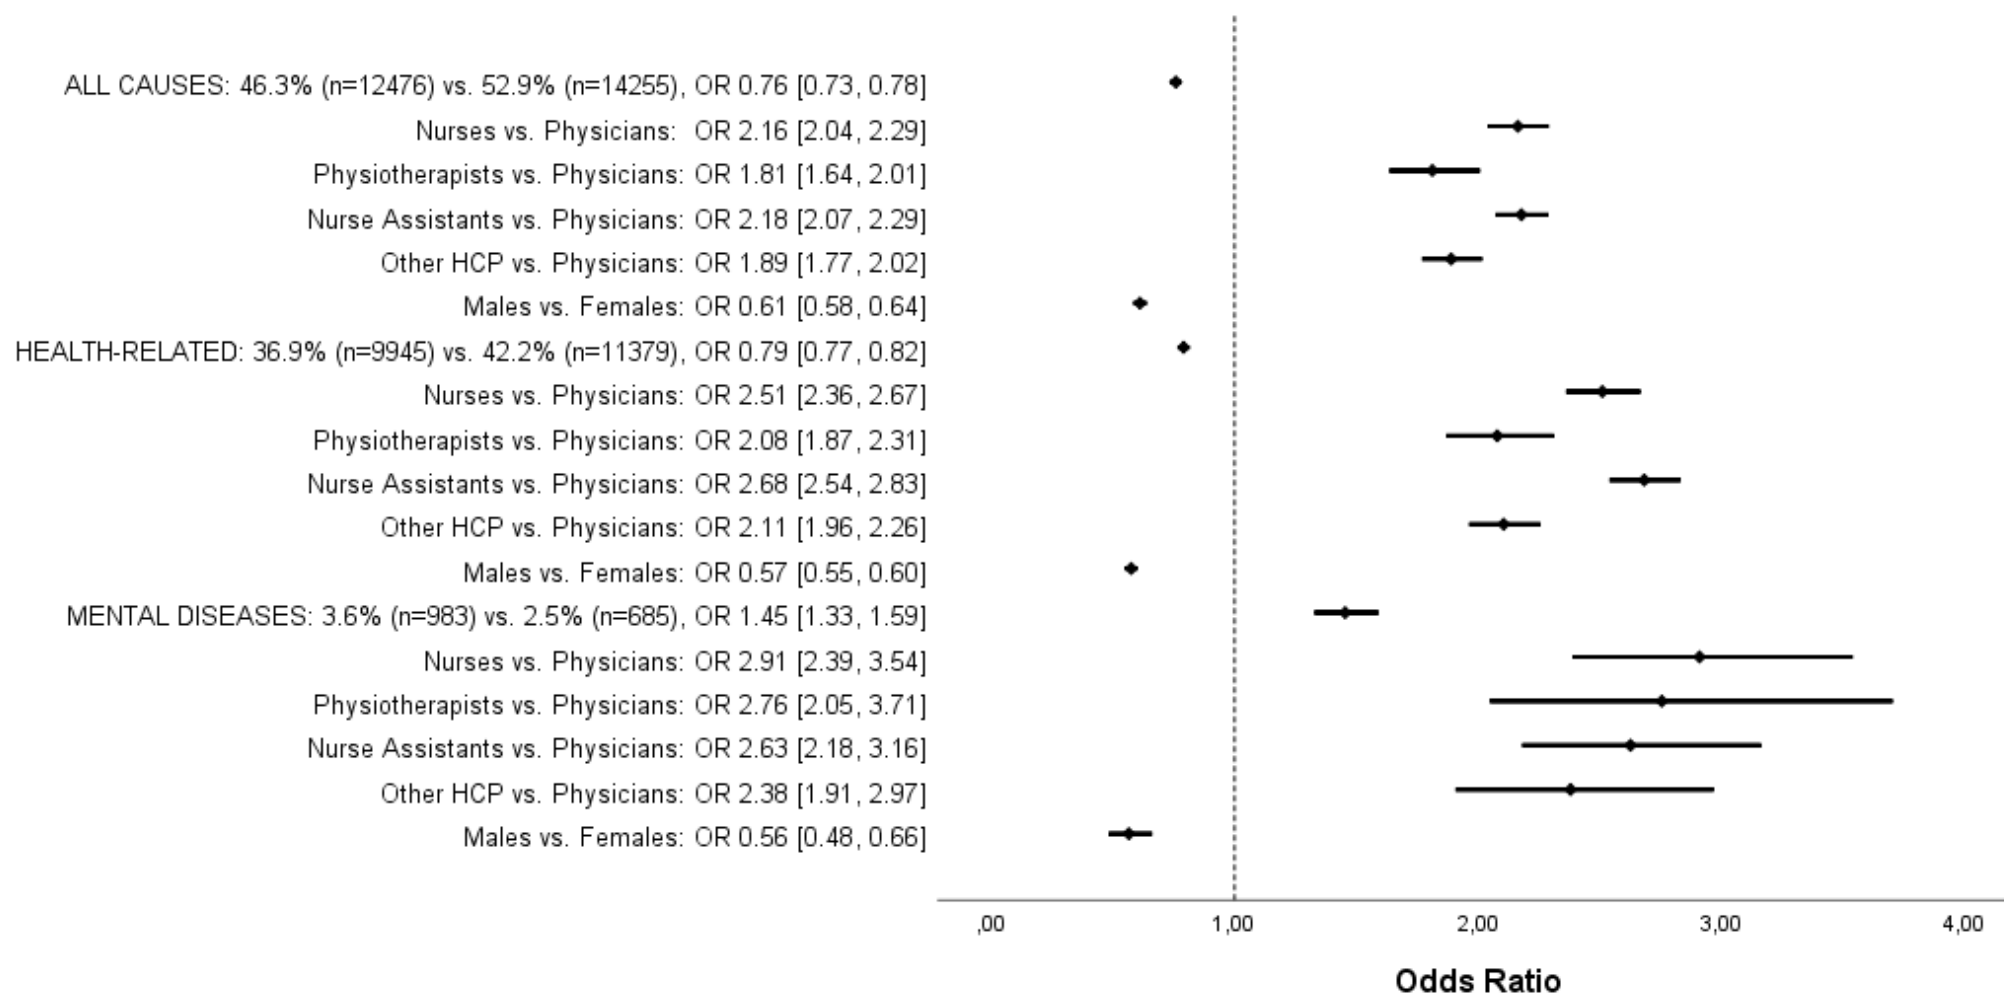

## Graph

**Figure - Comparisons between exposed vs. non-exposed PHYSICIANS (N = 6871) regarding work absences due to All Causes, Health-Related Causes and Mental Diseases, adjusted for gender differences**

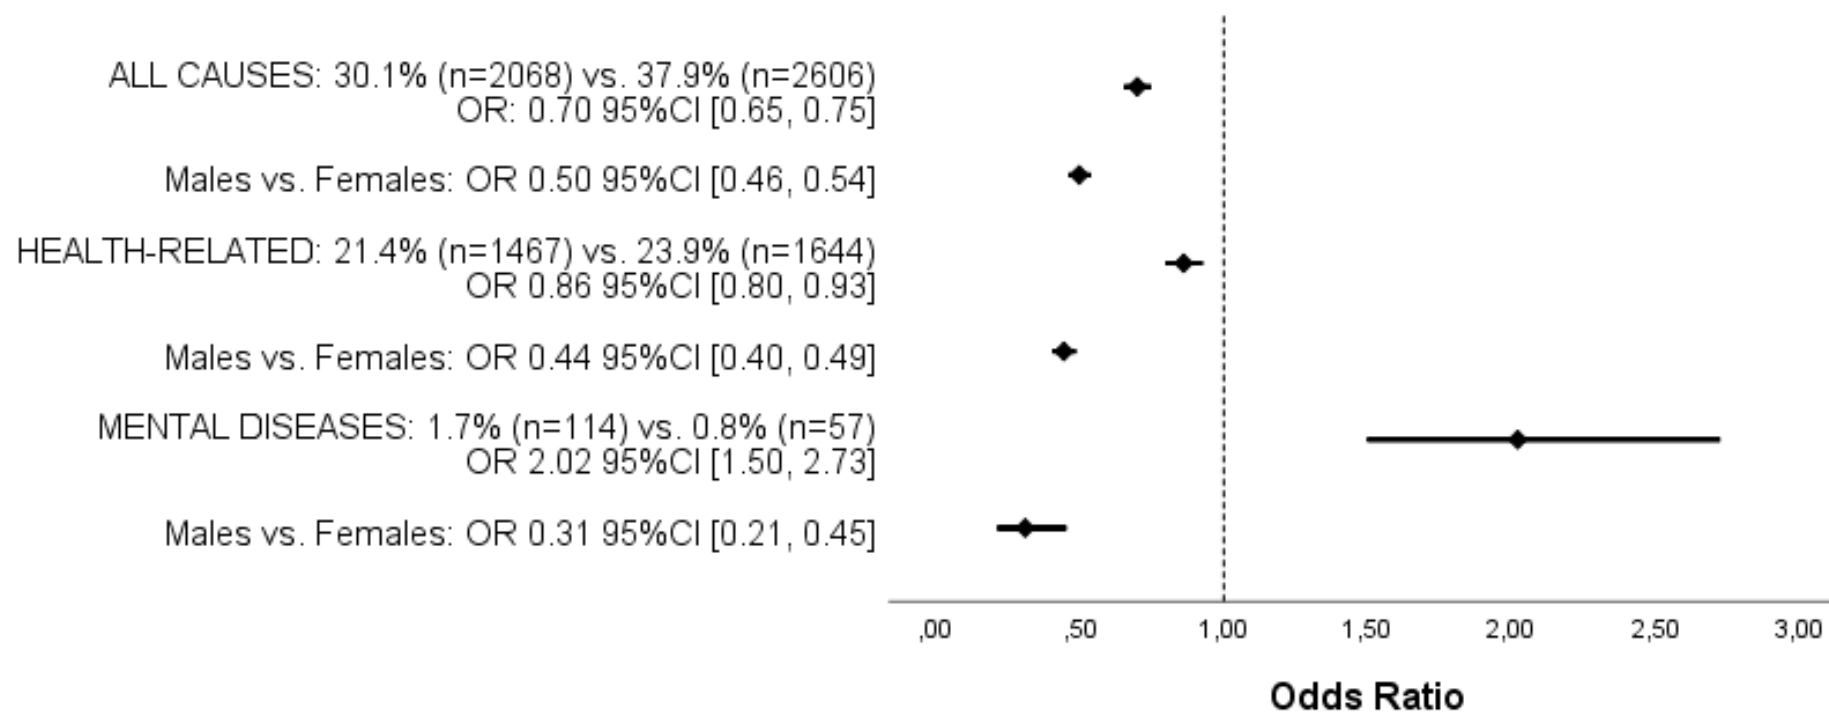

## Custom Tables

| Healthcare provider category                                  |                                                                      | Exposure to the pandemia environment                                 |            |                |            |        |        |
|---------------------------------------------------------------|----------------------------------------------------------------------|----------------------------------------------------------------------|------------|----------------|------------|--------|--------|
|                                                               |                                                                      | Non-Exposed (2019)                                                   |            | Exposed (2020) |            |        |        |
|                                                               |                                                                      | Count                                                                | Column N % | Count          | Column N % |        |        |
| Physicians                                                    | Any work absence due to ALL CAUSES occurred in the period            | No                                                                   | 4265       | 62,1%          | 4803       | 69,9%  |        |
|                                                               |                                                                      | Yes                                                                  | 2606       | 37,9%          | 2068       | 30,1%  |        |
|                                                               |                                                                      | Total                                                                | 6871       | 100,0%         | 6871       | 100,0% |        |
|                                                               | Any work absence due to HEALTH-RELATED CAUSES occurred in the period | No                                                                   | 5227       | 76,1%          | 5404       | 78,6%  |        |
|                                                               |                                                                      | Yes                                                                  | 1644       | 23,9%          | 1467       | 21,4%  |        |
|                                                               |                                                                      | Total                                                                | 6871       | 100,0%         | 6871       | 100,0% |        |
|                                                               | Any work absence due to MENTAL DISEASE occurred in the period        | No                                                                   | 6814       | 99,2%          | 6757       | 98,3%  |        |
|                                                               |                                                                      | Yes                                                                  | 57         | 0,8%           | 114        | 1,7%   |        |
|                                                               |                                                                      | Total                                                                | 6871       | 100,0%         | 6871       | 100,0% |        |
|                                                               | Nurses                                                               | Any work absence due to ALL CAUSES occurred in the period            | No         | 2226           | 40,0%      | 2668   | 47,9%  |
|                                                               |                                                                      |                                                                      | Yes        | 3344           | 60,0%      | 2902   | 52,1%  |
|                                                               |                                                                      |                                                                      | Total      | 5570           | 100,0%     | 5570   | 100,0% |
|                                                               |                                                                      | Any work absence due to HEALTH-RELATED CAUSES occurred in the period | No         | 2808           | 50,4%      | 3214   | 57,7%  |
|                                                               |                                                                      |                                                                      | Yes        | 2762           | 49,6%      | 2356   | 42,3%  |
|                                                               |                                                                      |                                                                      | Total      | 5570           | 100,0%     | 5570   | 100,0% |
| Any work absence due to MENTAL DISEASE occurred in the period |                                                                      | No                                                                   | 5382       | 96,6%          | 5300       | 95,2%  |        |
|                                                               |                                                                      | Yes                                                                  | 188        | 3,4%           | 270        | 4,8%   |        |
|                                                               |                                                                      | Total                                                                | 5570       | 100,0%         | 5570       | 100,0% |        |
| Physiotherapists                                              | Any work absence due to ALL CAUSES occurred in the period            | No                                                                   | 454        | 44,6%          | 547        | 53,7%  |        |
|                                                               |                                                                      | Yes                                                                  | 565        | 55,4%          | 472        | 46,3%  |        |

|                  |                                                                      |       |       |        |       |        |
|------------------|----------------------------------------------------------------------|-------|-------|--------|-------|--------|
|                  |                                                                      | Total | 1019  | 100,0% | 1019  | 100,0% |
|                  | Any work absence due to HEALTH-RELATED CAUSES occurred in the period | No    | 564   | 55,3%  | 649   | 63,7%  |
|                  |                                                                      | Yes   | 455   | 44,7%  | 370   | 36,3%  |
|                  |                                                                      | Total | 1019  | 100,0% | 1019  | 100,0% |
|                  | Any work absence due to MENTAL DISEASE occurred in the period        | No    | 988   | 97,0%  | 973   | 95,5%  |
|                  |                                                                      | Yes   | 31    | 3,0%   | 46    | 4,5%   |
|                  |                                                                      | Total | 1019  | 100,0% | 1019  | 100,0% |
| Nurse assistants | Any work absence due to ALL CAUSES occurred in the period            | No    | 4331  | 42,2%  | 4711  | 45,9%  |
|                  |                                                                      | Yes   | 5935  | 57,8%  | 5555  | 54,1%  |
|                  |                                                                      | Total | 10266 | 100,0% | 10266 | 100,0% |
|                  | Any work absence due to HEALTH-RELATED CAUSES occurred in the period | No    | 5171  | 50,4%  | 5652  | 55,1%  |
|                  |                                                                      | Yes   | 5095  | 49,6%  | 4614  | 44,9%  |
|                  |                                                                      | Total | 10266 | 100,0% | 10266 | 100,0% |
|                  | Any work absence due to MENTAL DISEASE occurred in the period        | No    | 9936  | 96,8%  | 9837  | 95,8%  |
|                  |                                                                      | Yes   | 330   | 3,2%   | 429   | 4,2%   |
|                  |                                                                      | Total | 10266 | 100,0% | 10266 | 100,0% |
| Other HCP        | Any work absence due to ALL CAUSES occurred in the period            | No    | 1425  | 44,1%  | 1751  | 54,2%  |
|                  |                                                                      | Yes   | 1805  | 55,9%  | 1479  | 45,8%  |
|                  |                                                                      | Total | 3230  | 100,0% | 3230  | 100,0% |
|                  | Any work absence due to HEALTH-RELATED CAUSES occurred in the period | No    | 1807  | 55,9%  | 2092  | 64,8%  |
|                  |                                                                      | Yes   | 1423  | 44,1%  | 1138  | 35,2%  |
|                  |                                                                      | Total | 3230  | 100,0% | 3230  | 100,0% |
|                  | Any work absence due to MENTAL DISEASE occurred in the period        | No    | 3151  | 97,6%  | 3106  | 96,2%  |
|                  |                                                                      | Yes   | 79    | 2,4%   | 124   | 3,8%   |
|                  |                                                                      | Total | 3230  | 100,0% | 3230  | 100,0% |
| Total            | Any work absence due to ALL CAUSES occurred in the period            | No    | 12701 | 47,1%  | 14480 | 53,7%  |
|                  |                                                                      | Yes   | 14255 | 52,9%  | 12476 | 46,3%  |
|                  |                                                                      | Total | 26956 | 100,0% | 26956 | 100,0% |
|                  | Any work absence due to HEALTH-                                      | No    | 15577 | 57,8%  | 17011 | 63,1%  |

Supporting Information. Part5

|                                                               |       |       |        |       |        |
|---------------------------------------------------------------|-------|-------|--------|-------|--------|
| RELATED CAUSES occurred in the period                         | Yes   | 11379 | 42,2%  | 9945  | 36,9%  |
|                                                               | Total | 26956 | 100,0% | 26956 | 100,0% |
| Any work absence due to MENTAL DISEASE occurred in the period | No    | 26271 | 97,5%  | 25973 | 96,4%  |
|                                                               | Yes   | 685   | 2,5%   | 983   | 3,6%   |
|                                                               | Total | 26956 | 100,0% | 26956 | 100,0% |
